# Supplementary material for: Dinuclear osmium complexes as mitochondrion-targeting antitumor photothermal agentsin vivo
Source: Royal Society of Chemistry journal article supplement (doi:10.1039/d2cc05230j), 2022-01-01
Supplement: d2cc05230j1.pdf [file d2cc05230j1.pdf]

## Electronic Supplementary Information

### **Dinuclear osmium complexes as mitochondrion-targeting antitumor photothermal agents in vivo**

Meng-Fan Wang,<sup>a</sup> Yu-Ang Deng,<sup>a</sup> Qing-Fang Li,<sup>a</sup> Shi-Jie Tang,<sup>a</sup> Rong Yang,<sup>a</sup> Run-Yu Zhao,<sup>a</sup> Fu-Dan Liu,<sup>a</sup> Xiaoxia Ren,<sup>b</sup> Dan Zhang,<sup>c</sup> Feng Gao\*<sup>a</sup>

<sup>a</sup> *Key Laboratory of Medicinal Chemistry for Natural Resource, Ministry of Education; Yunnan Provincial Center for Research & Development of Natural Products; School of Pharmacy, Yunnan University, Kunming, 650091, P. R. China.*

<sup>b</sup> *Animal Research and Resource Center, School of Life Sciences, Yunnan University, Kunming, 650091, P. R. China.*

<sup>c</sup> *First Affiliated Hospital of Kunming Medical University, Kunming 650032, P. R. China.*

---

\* Corresponding author

E-mail: gaofeng@ynu.edu.cn

## 1. General

**Instruments.**  $^1\text{H}$  NMR spectra were recorded on a Bruker Avance 300 spectrometer at 400 MHz. All chemical shifts are given relative to tetramethylsilane (TMS). Electron Spray ionization mass spectra (ESI-MS) were recorded on AB QSTAR Pulsar mass spectrometer. UV-Vis spectra were recorded on a Perkin-Elmer Lambda 365 spectrophotometer equipped with a temperature controller accessory and circulating water system. Fluorescence spectra were recorded on a Hitachi F-4700 fluorescence spectrophotometer. FT-IR spectra were recorded on a Nicolet iS 10 FTIR spectrometer.

**Materials.** The compounds 1,10-phenanthroline-5,6-dione and *cis*- $[\text{Os}(\text{L})_2\text{Cl}_2]$  (L = bpy, tbubpy, phen, dip, where bpy = 2,2'-bipyridine, tbubpy = 4,4'-di-*tert*-butyl-2,2'-bipyridine, phen = 1,10-phenanthroline, dip = 4,7-diphenyl-1,10-phenanthroline) were synthesized according to the literature methods.<sup>1,2</sup> The bridging ligand **pppp** ([1,10]phenanthrolino[5'',6'':5',6']pyrazino[2',3':5,6]pyrazino[2,3-*f*][1,10]phenanthroline) were prepared according a 6-step method previously designed by us.<sup>3</sup> Potassium phthalimide, 3,4-dichloro-1,2,5-thiadiazole, acetonitrile (MeCN) and methylamine hydrochloride were purchased from Adamas-beta. DMSO-*d*<sub>6</sub> were purchased from Energy Chemical. Alumina (200–300 mesh), ammonium hydroxide, tetrahydrofuran (THF), N,N-dimethylformamide (DMF), ethanol (EtOH), trichloromethane (CHCl<sub>3</sub>), acetone and toluene were purchased from Greagent.

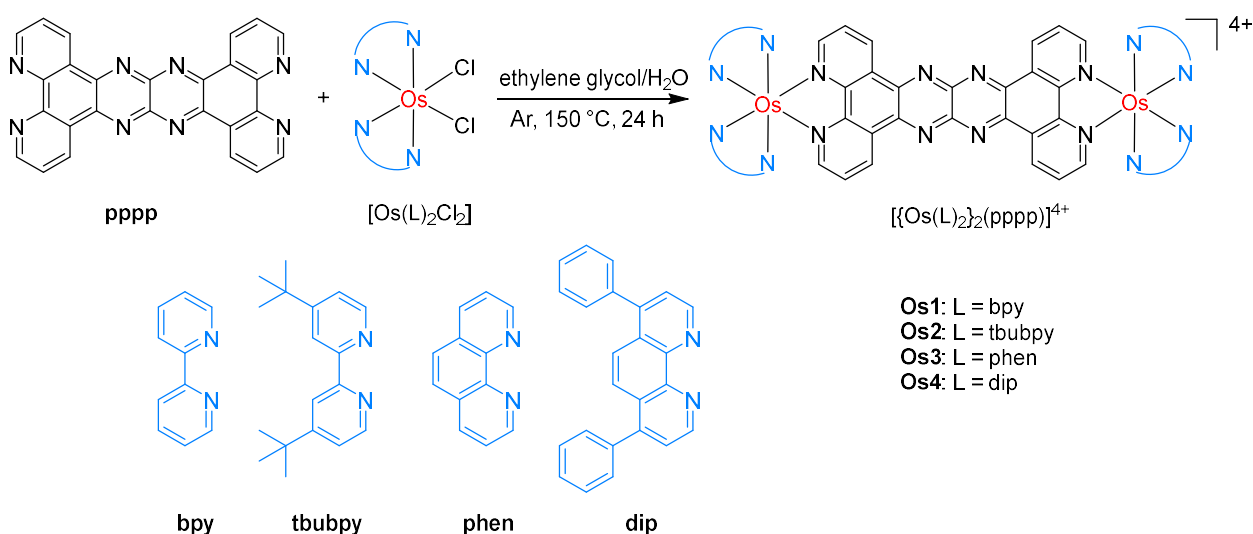

**Scheme S1.** Synthetic route to the dinuclear Os(II) complexes (DOCs).

## 2. Synthesis and Characterization

The ligand **pppp** (34 mg, 0.08 mmol) was stirred with *cis*-[Os(L)<sub>2</sub>Cl<sub>2</sub>] (0.17 mmol, 2.1 eq.), 1 mL water and 6 mL ethylene glycol under Ar at 150 °C for 24 h. The black solution was cooled to 20 °C and poured into water (20 mL). Upon addition of NH<sub>4</sub>PF<sub>6</sub> (1 g, 6.2 mmol) in water (5 mL), the dinuclear Os(II) complexes precipitated as black solid, which was isolated by suction filtration, washed by small amount of water, EtOH and diethyl ether (3 × 10 mL), and dried in vacuo. The crude product was purified by flash column chromatography on alumina (200–300 mesh) with MeCN/Tol (1:2) as eluent.

**Os1** (L = bpy): <sup>1</sup>H NMR (400 MHz, DMSO-*d*<sub>6</sub>): 9.55 (d, *J* = 8.0 Hz, 4H), 8.91 (d, *J* = 8.0 Hz, 4H), 8.88 (d, *J* = 8.0 Hz, 4H), 8.30 (d, *J* = 4.0 Hz, 4H), 8.07 (t, *J* = 8.0 Hz, 4H), 8.01 (d, *J* = 8.0 Hz, 4H), 7.99 (t, *J* = 8.0 Hz, 4H), 7.76 (d, *J* = 8.0 Hz, 4H), 7.71 (d, *J* = 4.0 Hz, 4H), 7.54 (t, *J* = 4.0 Hz, 4H), 7.33 (t, *J* = 4.0 Hz, 4H); MS (ESI) calcd for C<sub>66</sub>H<sub>44</sub>N<sub>16</sub>Os<sub>2</sub> [M–4PF<sub>6</sub>]<sup>4+</sup>: 360.5784; Found: 360.5747. FTIR (KBr)  $\nu_{\max}$  (cm<sup>-1</sup>): 2963 (CH, aryl), 2924 (CH, aryl), 1631 (C=C, aryl), 1464 (C=C, aryl), 1424 (CH, aryl), 1384 (CN, pyridyl), 1357 (CN, pyridyl), 1312 (CN, pyridyl), 1161 (CN, pyrazine), 1118 (CN, pyrazine), 845 (PF), 765 (C=C, aryl), 725 (C=C, aryl), 558 (PF).

**Os2** (L = tbubpy): <sup>1</sup>H NMR (400 MHz, DMSO-*d*<sub>6</sub>): 9.51 (d, *J* = 8.0 Hz, 4H), 8.89 (d, *J* = 12.0 Hz, 8H), 8.25 (d, *J* = 8.0 Hz, 4H), 8.01 (t, *J* = 8.0 Hz, 4H), 7.57 (s, 8H), 7.56 (d, *J* = 4.0 Hz, 4H), 7.32 (d, *J* = 8.0 Hz, 4H), 1.44 (s, 36H), 1.36 (s, 36H); MS (ESI) calcd for C<sub>98</sub>H<sub>107</sub>N<sub>16</sub>Os<sub>2</sub> [M–H–4PF<sub>6</sub>]<sup>4+</sup>: 472.7024; Found: 472.7000. FTIR (KBr)  $\nu_{\max}$  (cm<sup>-1</sup>): 2964 (CH, aryl), 2925 (CH, aryl), 1618 (C=C, aryl), 1481 (C=C, aryl), 1417 (CH, aryl), 1384 (CN, pyridyl), 1160 (CN, pyridyl), 1116 (CN, imidazolyl), 839 (PF), 719, (C=C, aryl), 558 (PF).

**Os3** (L = phen): <sup>1</sup>H NMR (400 MHz, DMSO-*d*<sub>6</sub>): 9.51 (d, *J* = 8.0 Hz, 4H), 8.62 (d, *J* = 8.0 Hz, 4H), 8.60 (d, *J* = 8.0 Hz, 4H), 8.43 (s, 8H), 8.23 (d, *J* = 8.0 Hz, 8H), 7.99 (d, *J* = 4.0 Hz, 4H), 7.88 (dd, *J* = 8.0, 4.0 Hz, 4H), 7.79 (dd, *J* = 8.0, 4.0 Hz, 4H), 7.74 (dd, *J* = 8.0, 4.0 Hz, 4H); MS (ESI) calcd for C<sub>74</sub>H<sub>44</sub>N<sub>16</sub>Os<sub>2</sub> [M–4PF<sub>6</sub>]<sup>4+</sup>: 384.5784; Found: 384.5742. FTIR (KBr)  $\nu_{\max}$  (cm<sup>-1</sup>): 2962 (CH, aryl),

2925 (CH, aryl), 1618 (C=C, aryl), 1481 (C=C, aryl), 1417 (CH, aryl), 1384 (CN, pyridyl), 1356 (CN, pyridyl), 1313 (CN, pyridyl), 1160 (CN, pyrazine), 1116 (CN, pyrazine), 840 (PF), 719 (C=C, aryl), 558 (PF).

**Os4** (L = dip):  $^1\text{H}$  NMR (400 MHz, DMSO- $d_6$ ): 9.59 (d,  $J = 8.0$  Hz, 4H), 8.40 (d,  $J = 4.0$  Hz, 4H), 8.36 (d,  $J = 4.0$  Hz, 4H), 8.32 (s, 8H), 8.27 (d,  $J = 4.0$  Hz, 4H), 8.00 (t,  $J = 4.0$  Hz, 4H), 7.79 (d,  $J = 4.0$  Hz, 8H), 7.68 (dd, 24H), 7.65 (s, 8H), 7.62 (m, 8H); MS (ESI) calcd for  $\text{C}_{122}\text{H}_{75}\text{N}_{16}\text{Os}_2 [\text{M-H-4PF}_6]^{4+}$ : 536.6398; Found: 536.6368. FTIR (KBr)  $\nu_{\text{max}}$  ( $\text{cm}^{-1}$ ): 2925 (CH, aryl), 2854 (CH, aryl), 1629 (C=C, aryl), 1384 (CN, pyridyl), 1117 (CN, imidazolyl), 839 (PF), 703 (C=C, aryl), 558 (PF).

For spectra, please see “6.  $^1\text{H}$  NMR, Mass, and FT-IR Spectra of DOCs Os1–4” (page 34–38).

### 3. Experimental Procedures

#### 1) DFT Calculations.

The density functional theory (DFT) calculations were carried out with the Gaussian16 quantum chemistry program package.<sup>4</sup> MN15,<sup>5</sup> a Kohn–Sham global-hybrid exchange–correlation density functional with simultaneous accuracy for photochemistry application, was selected because the theoretical data calculated by this functional were much closer to the experimental data than the other tested density functions, such as Becke’s three-parameter hybrid functional (B3LYP), CAM-B3LYP,<sup>6</sup> global-hybrid meta-GGA (generalized gradient approximation) M06,<sup>7</sup> and MN15-L.<sup>8</sup> For the same reason, Lanl2DZ basis set (a double-zeta basis set containing effective core potential) for all atoms was selected from a number of benchmarks, including SDD (Stuttgart/Dresden effective core potential) for all atoms, def2TZVP (Coulomb-fitting basis set) for all atoms, Lanl2DZ for Os/6-31G(d) for the others, Lanl2DZ for Os/6-311G(d,p) for the others, SDD for Os/6-31G(d) for the others, and SDD for Os/6-311G(d,p) for the others. The benchmark data is available to specialists in theoretical calculation upon request. DFT-D3 dispersion correction<sup>9</sup> containing Becke–Johnson (BJ) damping<sup>10</sup> was used in all calculations to improve accuracy. The full geometry optimization was carried out for the DOCs in

aqueous solution, using the conductor polarized continuum model (CPCM)<sup>11</sup>. The stability of the optimized conformation of the DOCs was confirmed by the frequency analysis, which shows no imaginary frequency for each energy minimum. For absorption spectral calculations, 80 lowest singlet excited states (ESs) were calculated using the analytical time-dependent DFT (TDDFT) theory to reproduce the experimental spectra. The discrete optical transitions with their corresponding oscillator strength were broadened by a Gaussian function with the full width at half maxima (FWHM) of 2200  $\text{cm}^{-1}$  to represent an experimental inhomogeneous spectral broadening. For fluorescence emission spectral calculations, the lowest singlet excited states (S1) were structurally optimized for the lowest 5 states and the theoretical spectra were generated as described for absorption spectra above. The structures of the excited triplet states were also optimized to reveal their transition properties. A compact representation of an ES *via* photoexcited hole–electron pair, which fits for chemical intuition, can be obtained using natural transition orbital (NTO) analysis.<sup>12</sup> By performing NTO calculations, a hole–electron pair transition from a ground state to an ES could be realized through unitary transformation of transition density matrix. NTO pairs contributing to the most important optical transitions were visualized for plotting excited charge densities (isovalue = 0.02).

## **2) Electrochemistry.**

Cyclic voltammetry (CV) measurements were performed with a CH Instruments 840D electrochemical workstation. Samples were dissolved in MeCN (water  $\leq$  30 ppm by Karl Fischer) with 0.1 M tetrabutylammonium hexafluorophosphate (TBAPF<sub>6</sub>) as a supporting electrolyte and the ferrocenium/ferrocene couple (Fc<sup>+</sup>/Fc) used as an internal standard. A 3 mm diameter platinum-plate working electrode, a Ag<sup>+</sup>/AgCl (0.1 M AgNO<sub>3</sub> in MeCN) reference electrode, and a platinum-wire counter electrode were used. All potentials are reported relative to Fc<sup>+</sup>/Fc.

## **3) DNA-binding Experiments.**

Calf thymus DNA (CT-DNA) was obtained from the Sigma Company. The preparation of DNA stock solution, determination of the DNA concentration and DNA-binding experiments of the DOCs, including absorption spectral titration, calculation of intrinsic binding constants, and thermal denaturation studies, were performed as described previously.<sup>13</sup>

#### **4) Topoisomerase Inhibition Assay.**

DNA Topoisomerase I (TopoI) was purchased from Invitrogen. The reaction mixture (20  $\mu$ L) contained 50 mM Tris HCl (pH 7.5), 50 mM KCl, 10 mM MgCl<sub>2</sub>, 0.5 mM DTT (dithiothreitol), 0.1 mM EDTA, 30  $\mu$ g/mL BSA, 0.1  $\mu$ g pBR322 DNA, 2 Unit of Topo, and different concentrations of DOC. The reaction mixtures were incubated for 30 min at 37°C. The samples were electrophoresed through 1% agarose gel (Sangon) in TBE at 90 V for 30 min. The gel was stained with 4S Red Plus Nucleic Acid Stain (Sangon), photographed and quantified on a FluorChem FC3 imaging system (ProteinSimple). The concentrations of DOC that prevented 50% of the supercoiled DNA from being converted into relaxed DNA (IC<sub>50</sub>) were calculated by the midpoint concentration for DOC-induced DNA unwinding.

#### **5) Singlet Oxygen Generation.**

Singlet oxygen (<sup>1</sup>O<sub>2</sub>) generation in air-saturated water was examined by monitoring the photo-oxidation of 9,10-anthracenediyl-bis(methylene)dimalonic acid (ABDA) induced by the DOCs at specific time intervals, under irradiation by 450, 520 and 600 nm light emitting diode (LED) array and 808 nm low-power laser (LPL) with external air-cooling devices. In air-saturated water, the absorbance of ABDA was adjusted to 0.4 at 378 nm, while the absorbance of DOCs was adjusted to 0.1 at 400 nm. The irradiances of LED array light sources were measured by an optical power meter (PM100D, Thorlabs) equipped with a thermal power sensor (S425C, Thorlabs), using the standard 5-point method, and unified to 50 mW cm<sup>-2</sup> by adjusting the distance between light source and sample. The power of

808 nm LPL was modified by a tunable controller, until the output irradiance reached  $0.1 \text{ W cm}^{-2}$ , as indicated by the optical power meter. ABDA without DOCs and ABDA with  $[\text{Os}(\text{bpy})_3]^{2+}$  (**Os0**) were tested as controls.

#### **6) Photothermal Effect Measurement.**

The temperature changes of **Os1–4** aqueous solution (1 mL) at different concentrations under 450, 520 and 600 nm LED ( $50 \text{ mW cm}^{-2}$ ) and 808 nm LPL ( $100 \text{ mW cm}^{-2}$ ) irradiation were monitored using an IR camera for living body (HIKvision). The photothermal conversion efficiencies ( $\eta$ ) of DOCs were calculated.<sup>14</sup>

#### **7) Two-photon Absorption Cross-section (TPACS) Measurement**

TPACSs of **Os4** (100  $\mu\text{M}$ ) in dry THF (water  $\leq 30$  ppm by Karl Fischer) were measured by the well-established method involving two-photon-induced fluorescence.<sup>15</sup> Two-photon photoluminescence spectra were recorded on a SpectroPro300i instrument, and the pump laser beam came from a Ti:sapphire laser system (pulse duration, 200 fs; repetition rate, 76 MHz; Coherent Mira900-D).

#### **8) Oil and Water Distribution Coefficient (Lipophilicity).**

Aqueous solution of DOC (5 mL, 10  $\mu\text{M}$ ) was mixed thoroughly with *n*-octanol (5 mL) in a 15 mL centrifuge tube. The tube was wrapped in aluminum foil, shaken for 24 h in an incubator equipped with a thermostatic shaker, and allowed to settle until the two phases were fully separated. The oil and water distribution coefficient ( $\log P_{\text{o/w}}$ ) was calculated using the relative concentrations of DOC in the two phases.<sup>16</sup>

#### **9) Cell Line and Culture Conditions.**

Human malignant melanoma A375 cell lines (STR authentication, Animal Research and Resource Center, Yunnan University) were cultured in Roswell Park Memorial Institute 1640 medium (RPMI 1640, Adamas Life) supplemented with 10% (v/v) fetal bovine serum (FBS, Gibco BRL) at 37 °C in a CO<sub>2</sub> incubator with a humidified atmosphere (95% air and 5% CO<sub>2</sub>). The tumor cells were routinely sub-cultured twice per week by trypsin-EDTA treatment. The cells in an exponential growth phase were harvested and counted for tumor inoculation.<sup>3</sup>

#### **10) Subcellular Colocalization Studied by Confocal Laser Scanning Microscope.**

A375 cells were grown on 8-Chamber Glass Slides (Thermo Fisher Scientific) at a density of  $6 \times 10^4$  cell mL<sup>-1</sup> and incubated for 1 h with the DOCs at 2.5 μM. The cells were washed with PBS (pH 7.4) twice. Nuclei and mitochondria were counterstained with Hoechst33342 (Invitrogen) and MitoTracker Green (MTG, Invitrogen), respectively. Fluorescence images were collected on a Leica TCS SP8 DIVE two-photon CLSM at three detection channels and processed by LAS X (Leica) software.<sup>3</sup>

#### **11) ICP-MS assay.**

Exponentially growing A375 cells were harvested, and the resulting single-cell suspension was plated into 100 mm tissue culture plates (Adamas) in  $1 \times 10^5$  cells per plate. After 24 h at 37 °C, the cells were incubated with 5 μM Os<sup>4</sup> for 2 h at 37 °C in either medium with serum or medium without serum. The cells were rinsed with PBS, detached with trypsin, counted and divided into three portions: (1) in portion 1, the nuclei were extracted using a nucleus extraction kit (Thermo); (2) in portion 2, the cytoplasm was extracted using a cytoplasm extraction kit (Thermo); (3) in portion 3, the mitochondria were extracted using a mitochondrial extraction kit (Thermo). All extraction procedures followed the manufacturer's protocols. The samples were digested with 60% HNO<sub>3</sub> at room temperature for one day. Each sample was diluted with water to obtain 2% HNO<sub>3</sub> sample solutions. The osmium content



was measured using PlasmaQuant PQ9000 inductively coupled plasma mass spectrometry (ICP-MS) using  $(\text{NH}_4)_2\text{OsCl}_6$  (99.99% trace metals basis, Sigma) as standard.

### **12) In vitro Cell Viability Test (CCK-8 assay).**

The cell viability was determined by the CCK-8 assay. Exponentially growing cells ( $1 \times 10^5$  cells per well) were seeded in 96-well plates, followed by a 24-hour incubation for attachment. Cells were incubated with different concentrations of DOCs or cisplatin. For phototoxicity studies, after 12 h of incubation, supernatant was replaced with fresh culture medium and cells were subjected to irradiation by the 808 nm LPL ( $100 \text{ mW cm}^{-2}$ , light dose =  $30.0 \text{ J cm}^{-2}$ ), and incubated for an additional 48 h. Cells without irradiation were replaced with fresh culture medium and maintained in the dark. Then 10  $\mu\text{L}$  of CCK-8 (Adamas Life) working solution was added and incubated for 1 h. Absorbance at 450 nm was measured on an iMark (Bio-rad) microplate reader, before and after CCK-8 incubation. Data were reported as the mean  $\pm$  standard deviation ( $n = 3$ ).  $\text{IC}_{50}$  values were determined by plotting the percentage of viability versus concentration on a logarithmic graph.<sup>3</sup>

### **13) Flow Cytometry Analysis.**

Cell apoptosis was measured by Annexin V-FITC (fluorescein isothiocyanate) and propidium iodide (PI) based on the manufacturer's manual (Beyotime). DOC-treated human melanoma cells A375 at a density of  $1 \times 10^5 \text{ cell mL}^{-1}$  in 1 mL of RPMI 1640 medium containing 10% FBS and  $1 \times 10^3$  units penicillin/streptomycin were incubated at  $37 \text{ }^\circ\text{C}$  (5%  $\text{CO}_2$ ) for 2 h. The DOC-containing medium were replaced with fresh DOC-free medium. Cells were irradiated by the 808 nm LPL, or away from the light, for 5 min at room temperature, stained with Annexin V-FITC and PI, and immediately examined with a BD FACSCalibur flow cytometer.<sup>17</sup>

### **14) In vivo photothermal therapy (PTT).**

All animal experiments were reviewed and approved by the Institutional Animal Care and Use Committee (IACUC) at Yunnan University, Kunming, China (Approval No: YNU20220269). BALB/c female nude mice aged 6–8 weeks (body weight 18–20 g) were purchased from GemPharmatech. The mice were kept in individually ventilated cage (IVC) systems at constant temperature (20–26 °C) and humidity (40–70%) with five animals in each cage. Each mouse was inoculated subcutaneously at the posterior right flank region with A375 tumor cells ( $5 \times 10^6$ ) in 0.1 ml of PBS for tumor development. The drug treatments were started when the mean tumor size reached  $66 \text{ mm}^3$ . The mice were randomly allocated into four groups (5 mice for each group): group 1, PBS injection only; group 2, PBS injection and subsequent irradiation with 808 nm laser ( $100 \text{ mW cm}^{-2}$ , light dose =  $30.0 \text{ J cm}^{-2}$ ); group 3, **Os4** (20  $\mu\text{L}$ , 10  $\mu\text{M}$ ) injection only; group 4, **Os4** (20  $\mu\text{L}$ , 10  $\mu\text{M}$ ) injection and subsequent irradiation with 808 nm laser ( $100 \text{ mW cm}^{-2}$ , light dose =  $30.0 \text{ J cm}^{-2}$ ). The temperature changes and photothermal imaging of tumor sites were monitored using an IR camera for living body (Hikvision). The body weight and tumor volume data were recorded every 2 or 3 days in the therapeutic regimen. Tumor volumes were expressed in  $\text{mm}^3$  using the formula:  $V = 0.5 a \times b^2$ , where  $a$  and  $b$  are the long and short diameters of the tumor, respectively. Tumor weight was measured at study termination. The entire procedure of dosing, as well as tumor and bodyweight measurement, were conducted in a Laminar Flow Cabinet. The relative tumor volume is calculated by  $V/V_0$  ( $V$  is the tumor volume on the day when data were recorded,  $V_0$  is the tumor volume on the day when treatment was started). After 14 days of therapy, the mice were sacrificed, and the tumors and primary organs (heart, lung, kidney, spleen, liver, intestine and brain) were obtained for histological analysis by hematoxylin-eosin (H&E) staining.<sup>3</sup>

## 4. Supplementary Figures

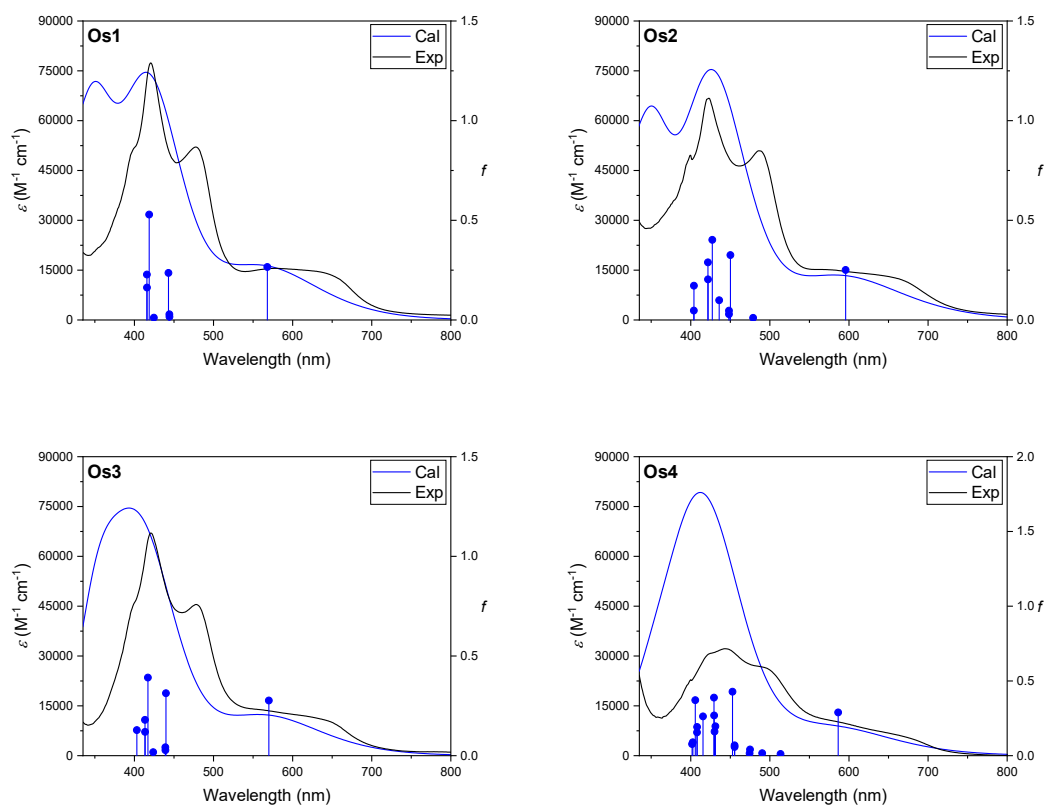

**Fig. S1.** Calculated (Cal, by Mn15/Lan12dz/CPCM method) and experimental (Exp) UV-Vis absorption spectra and oscillator strengths (blue spikes) of **Os1–4**.

Os1

Excitations

Singlet Emissions

Triplet Emissions

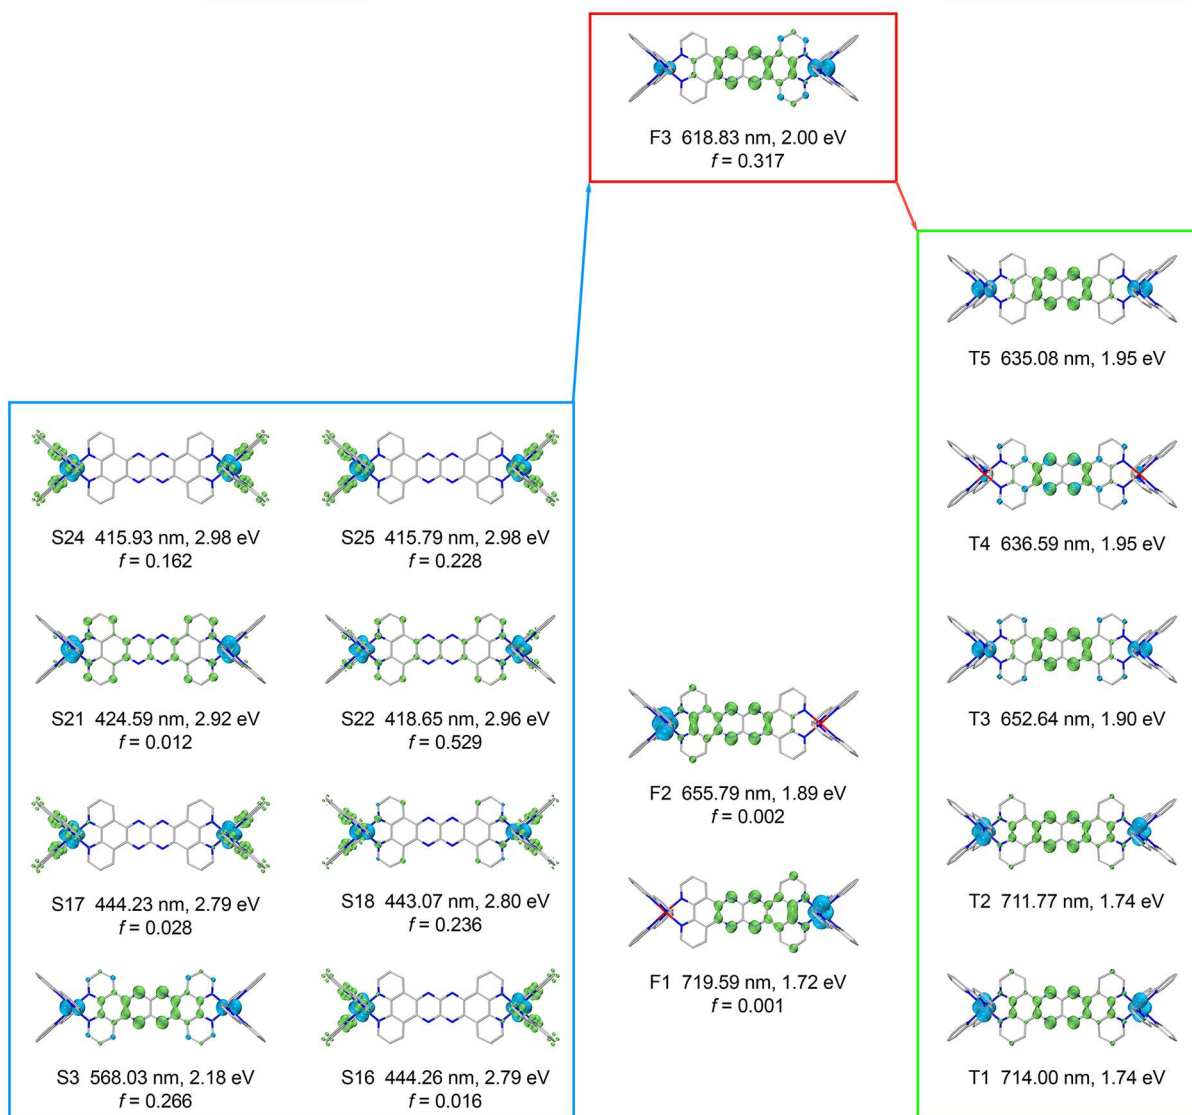

**Fig. S2.** Real space representation of hole (blue) and electron (green) distributions of **Os1** for ground, excited singlet and triplet states. Excitation wavelength (nm), excitation energy (eV), and oscillator strength ( $f$ ) for each hole-to-electron transition are presented.

Os2

Excitations

Singlet Emissions

Triplet Emissions

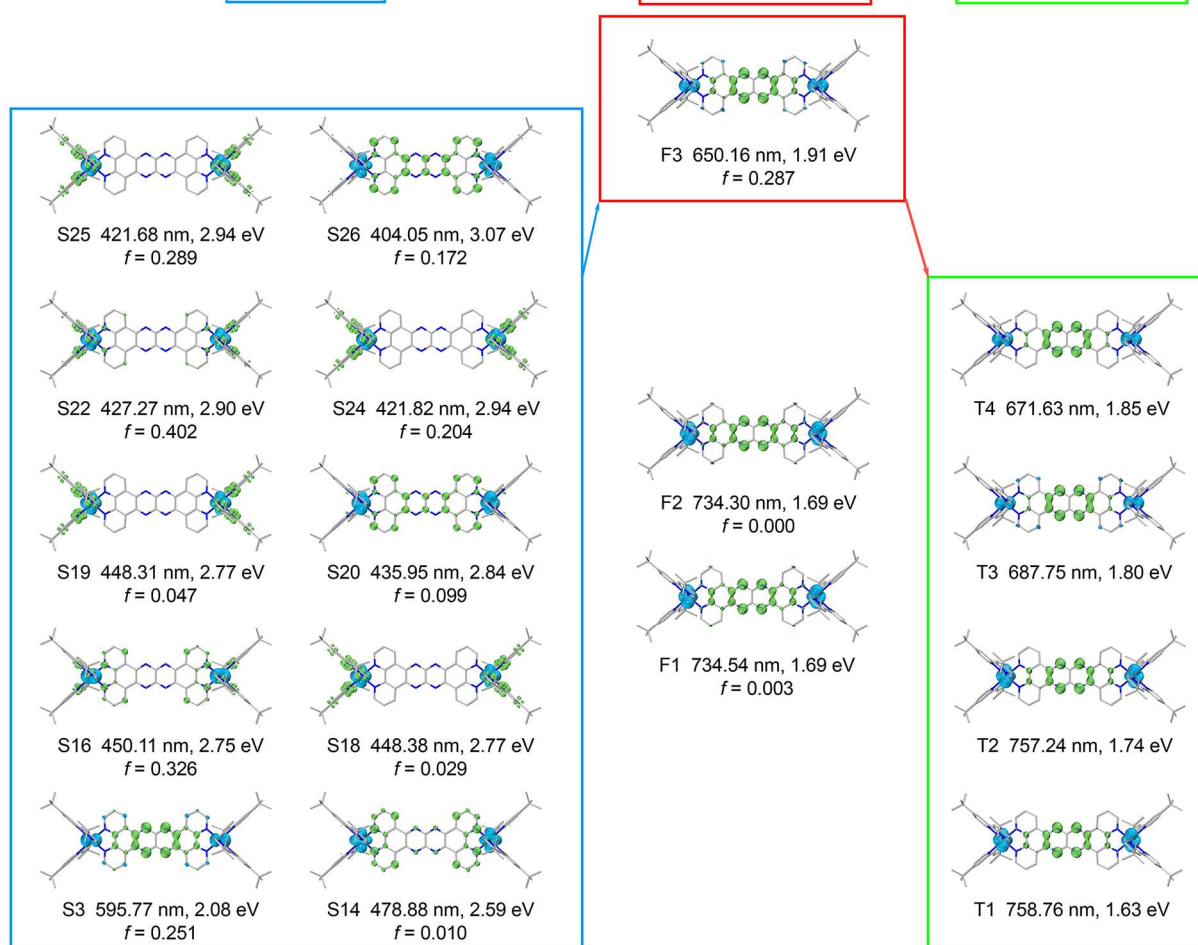

**Fig. S3.** Real space representation of hole (blue) and electron (green) distributions of **Os2** for ground, excited singlet and triplet states. Excitation wavelength (nm), excitation energy (eV), and oscillator strength ( $f$ ) for each hole-to-electron transition are presented.

Os3

Excitations

Singlet Emissions

Triplet Emissions

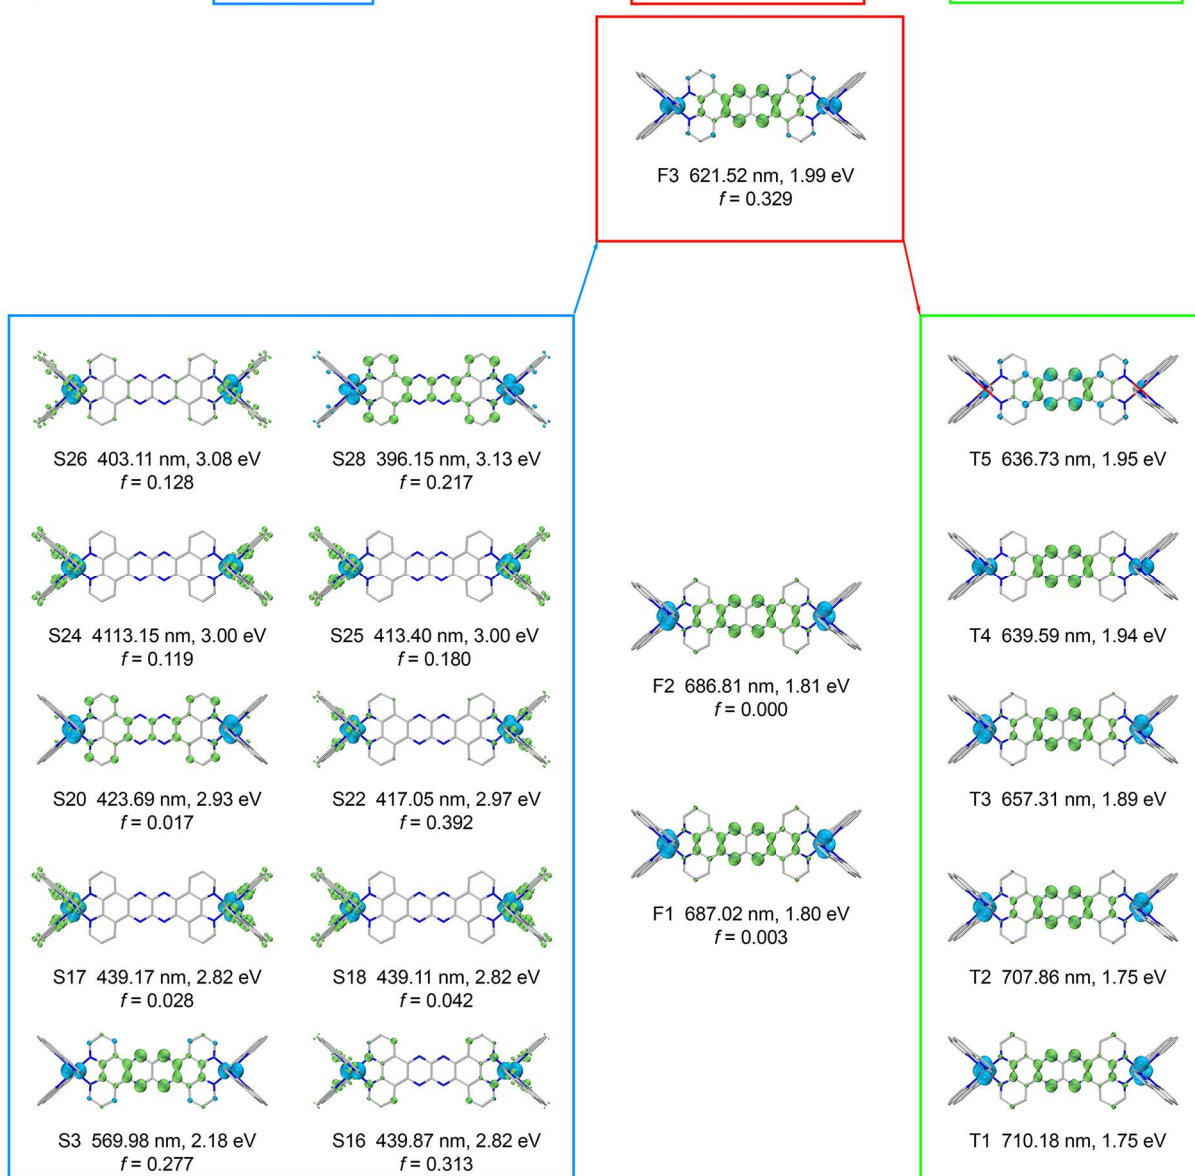

**Fig. S4.** Real space representation of hole (blue) and electron (green) distributions of **Os3** for ground, excited singlet and triplet states. Excitation wavelength (nm), excitation energy (eV), and oscillator strength ( $f$ ) for each hole-to-electron transition are presented.

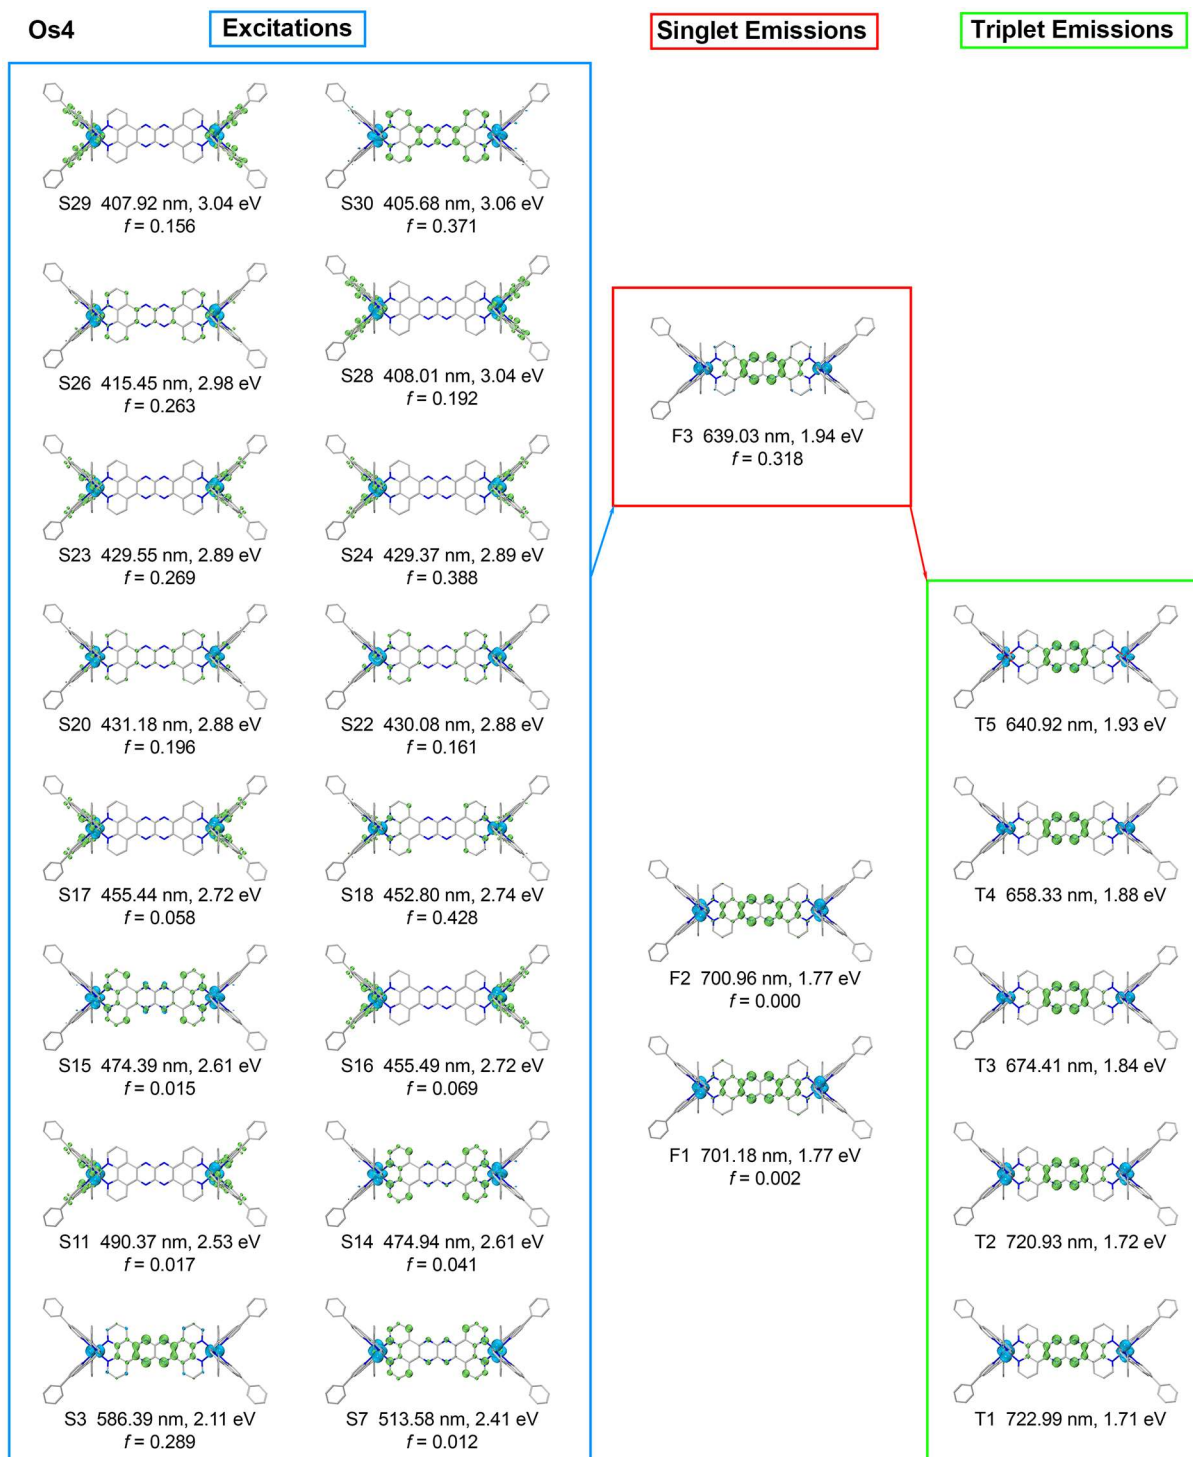

**Fig. S5.** Real space representation of hole (blue) and electron (green) distributions of **Os4** for ground, excited singlet and triplet states. Excitation wavelength (nm), excitation energy (eV), and oscillator strength ( $f$ ) for each hole-to-electron transition are presented.

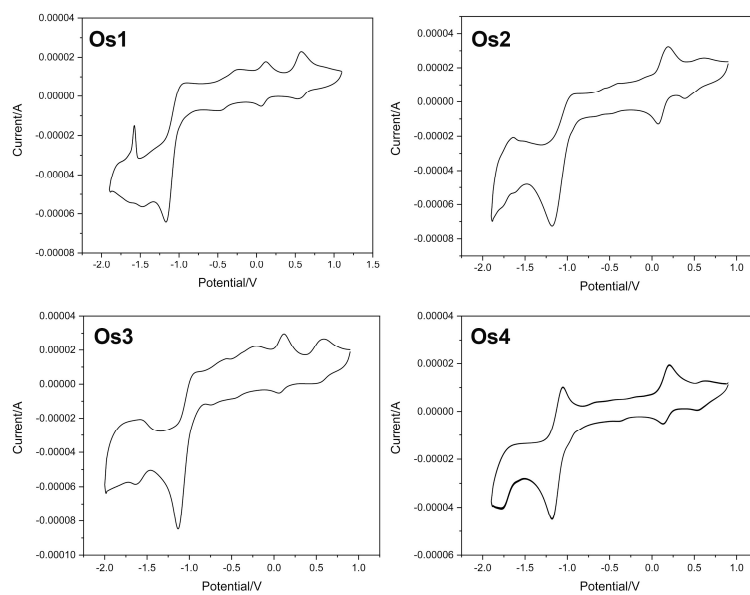

**Fig. S6.** Cyclic voltammetry of DOCs **Os1–4** in argon-saturated MeCN with ferrocenium/ferrocene couple (Fc<sup>+</sup>/Fc) used as an internal reference.



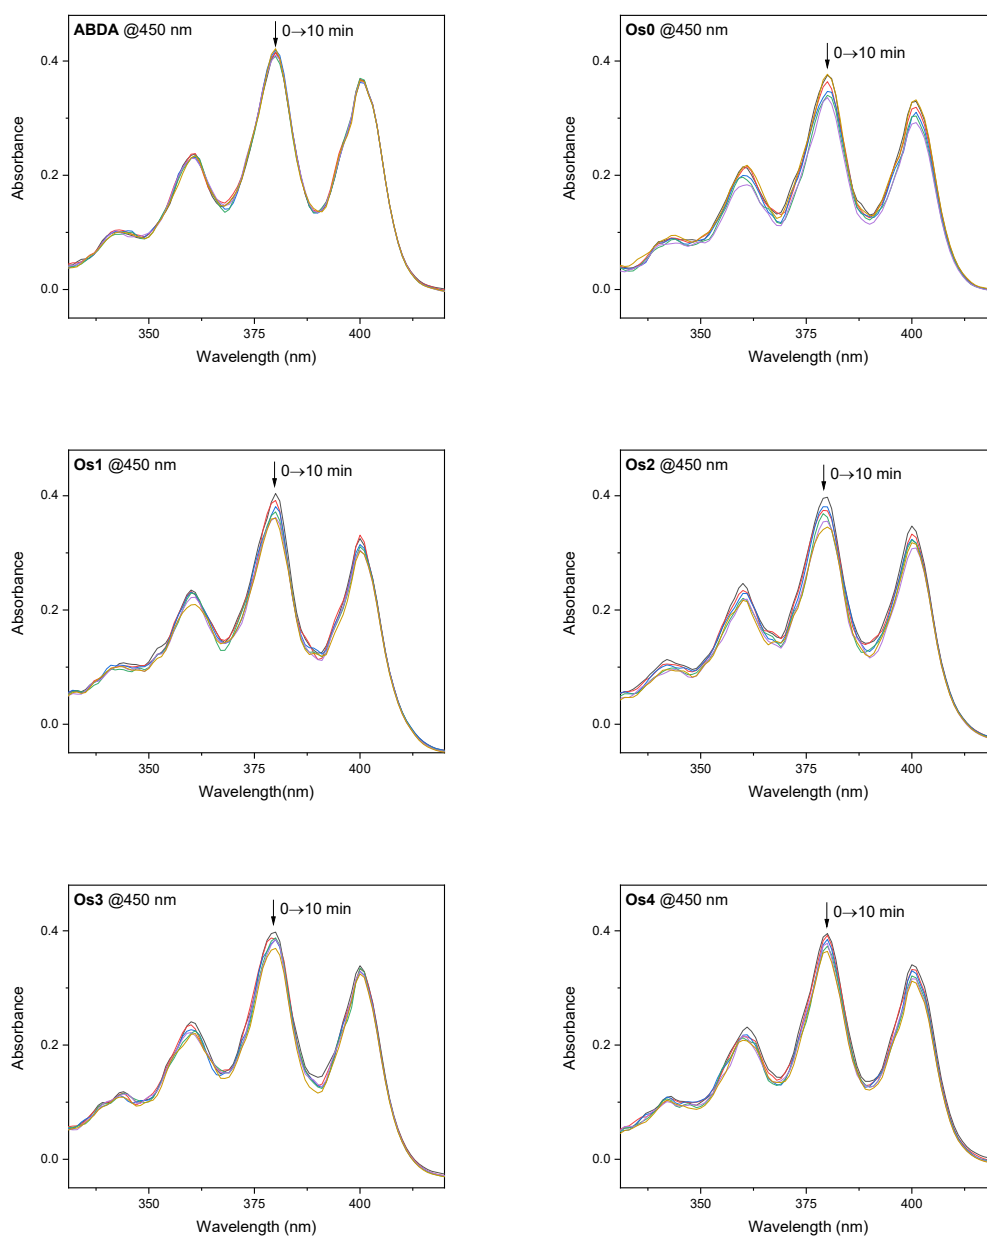

**Fig. S7.** Absorption spectral changes of ABDA in aqueous solution upon 450 nm LED ( $50 \text{ mW cm}^{-2}$ ) irradiation in the absence and presence of DOCs **Os1–4** and  $[\text{Os}(\text{bpy})_3]^{2+}$  (**Os0**).

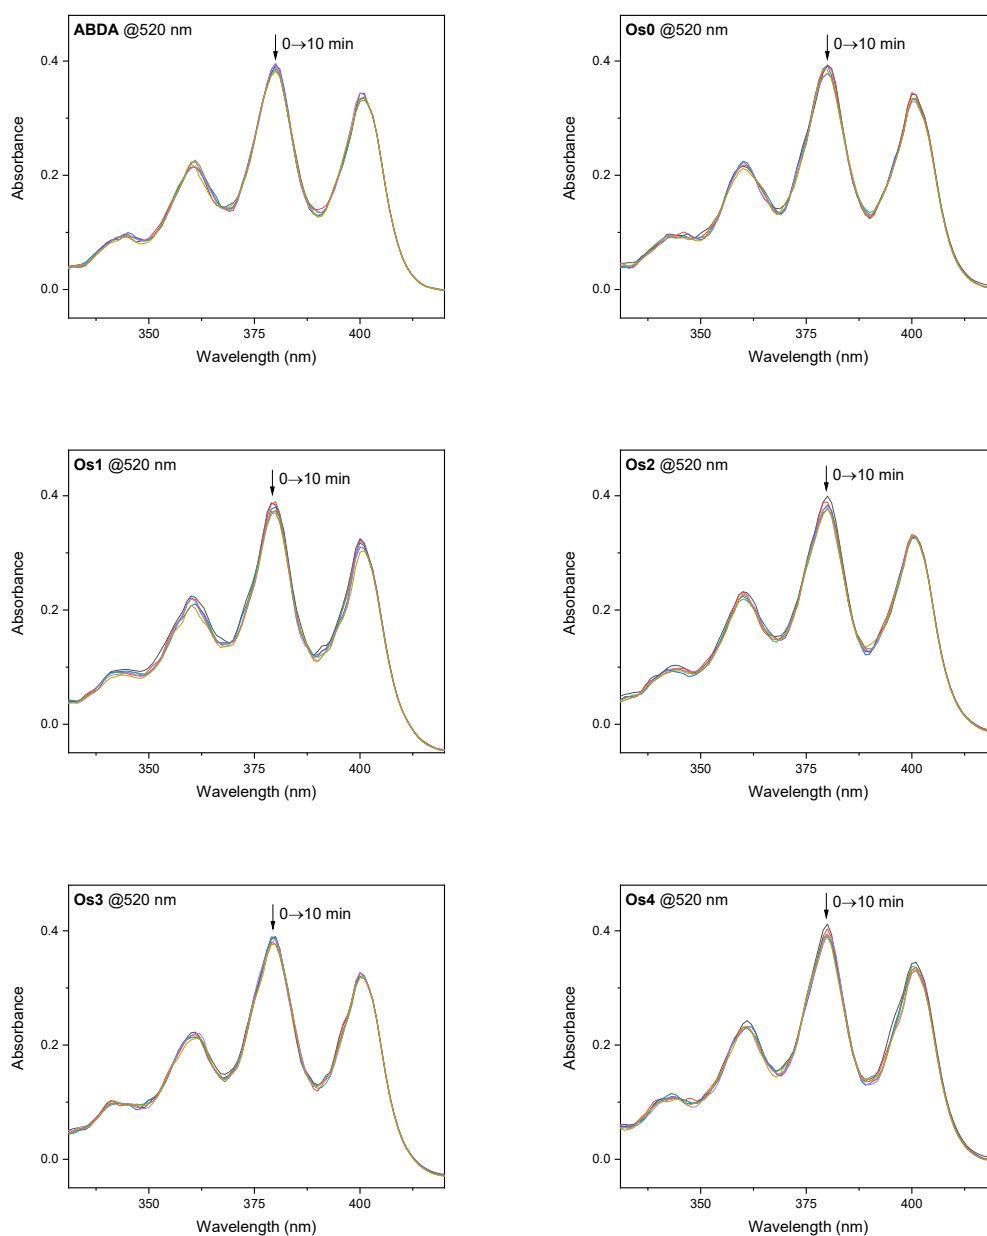

**Fig. S8.** Absorption spectral changes of ABDA in aqueous solution upon 520 nm LED ( $50 \text{ mW cm}^{-2}$ ) irradiation in the absence and presence of DOCs **Os1–4** and  $[\text{Os}(\text{bpy})_3]^{2+}$  (**Os0**).

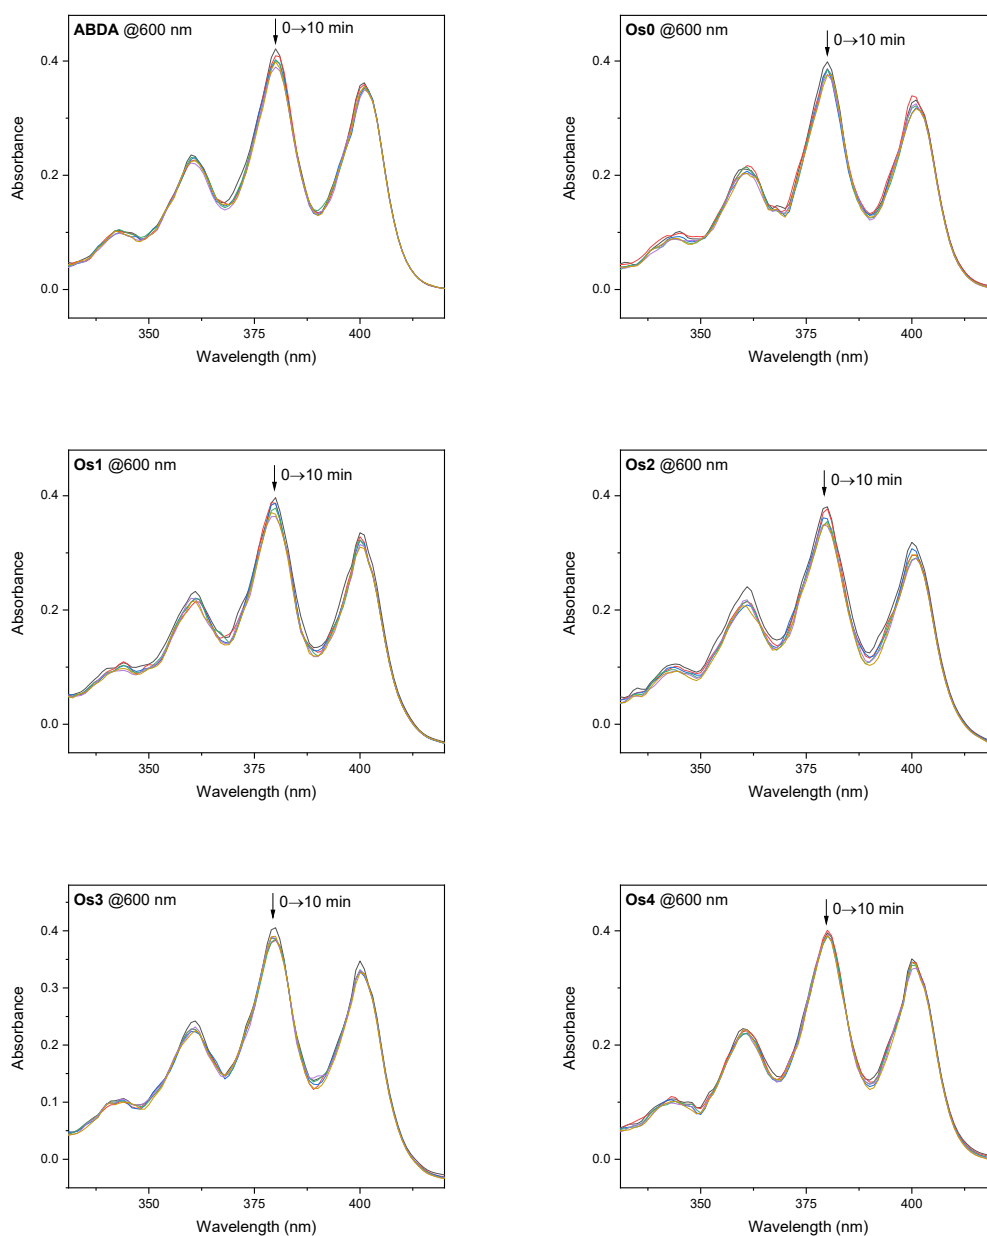

**Fig. S9.** Absorption spectral changes of ABDA in aqueous solution upon 600 nm LED ( $50 \text{ mW cm}^{-2}$ ) irradiation in the absence and presence of DOCs **Os1–4** and  $[\text{Os}(\text{bpy})_3]^{2+}$  (**Os0**).

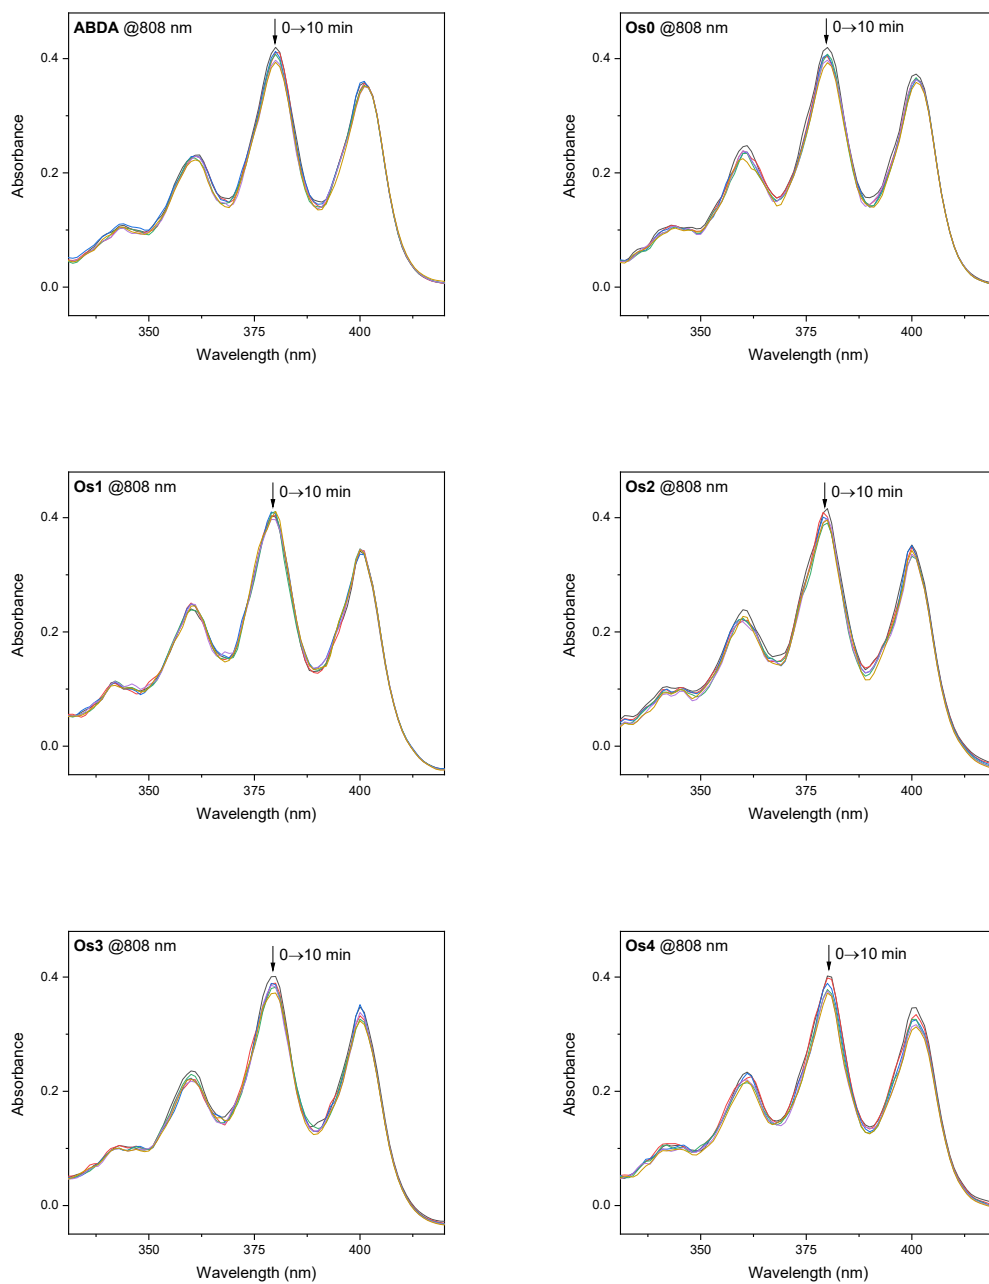

**Fig. S10.** Absorption spectral changes of ABDA in aqueous solution upon 808 nm LPL ( $100 \text{ mW cm}^{-2}$ ) irradiation in the absence and presence of DOCs **Os1–4** and  $[\text{Os}(\text{bpy})_3]^{2+}$  (**Os0**).

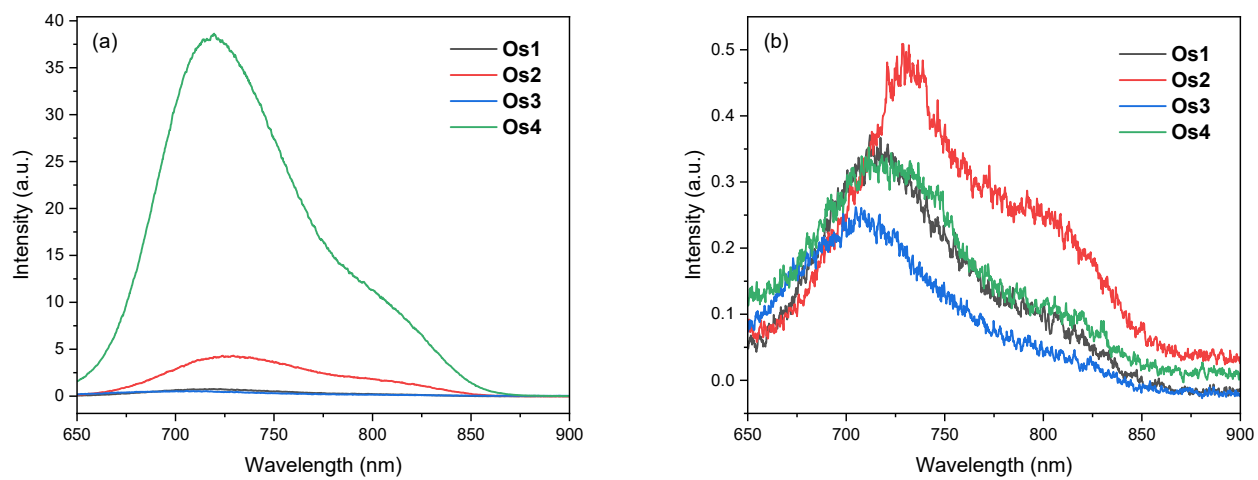

**Fig. S11.** Emission spectra of **Os1–4** (10  $\mu\text{M}$ ) in acetonitrile (a) and aqueous (b) solution.

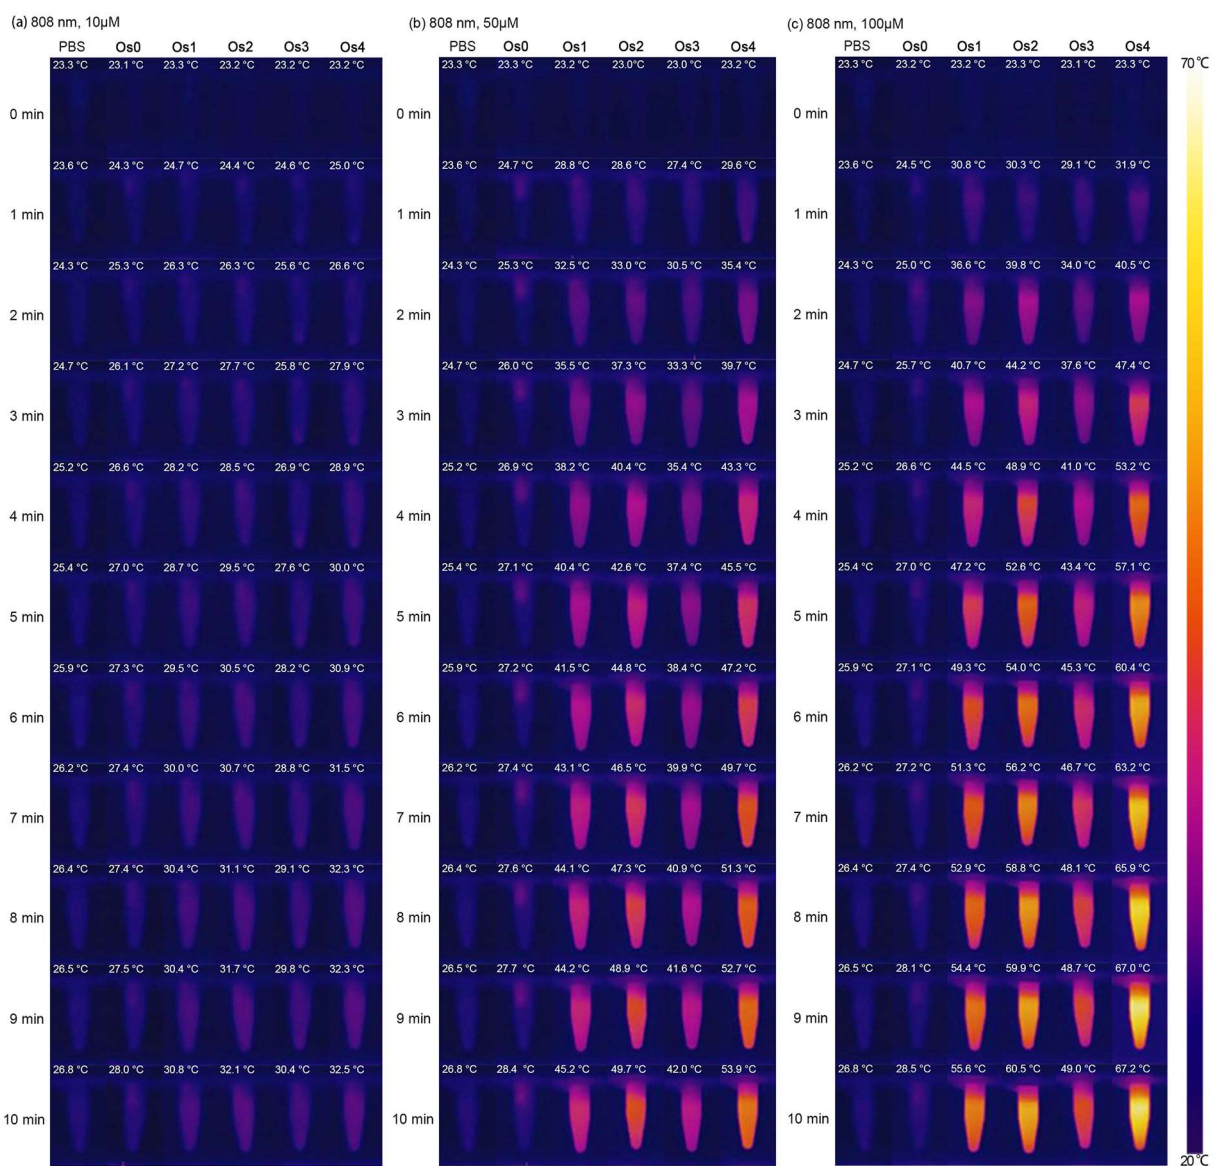

**Fig. S12.** Thermal images of PBS, **Os1–4** and  $[\text{Os}(\text{bpy})_3]^{2+}$  (**Os0**) at different concentrations in aqueous solution upon 808 nm LPL ( $100 \text{ mW cm}^{-2}$ ) irradiation for 10 min at 1 min intervals. (a) 10  $\mu\text{M}$ ; (b) 50  $\mu\text{M}$ ; (c) 100  $\mu\text{M}$ .

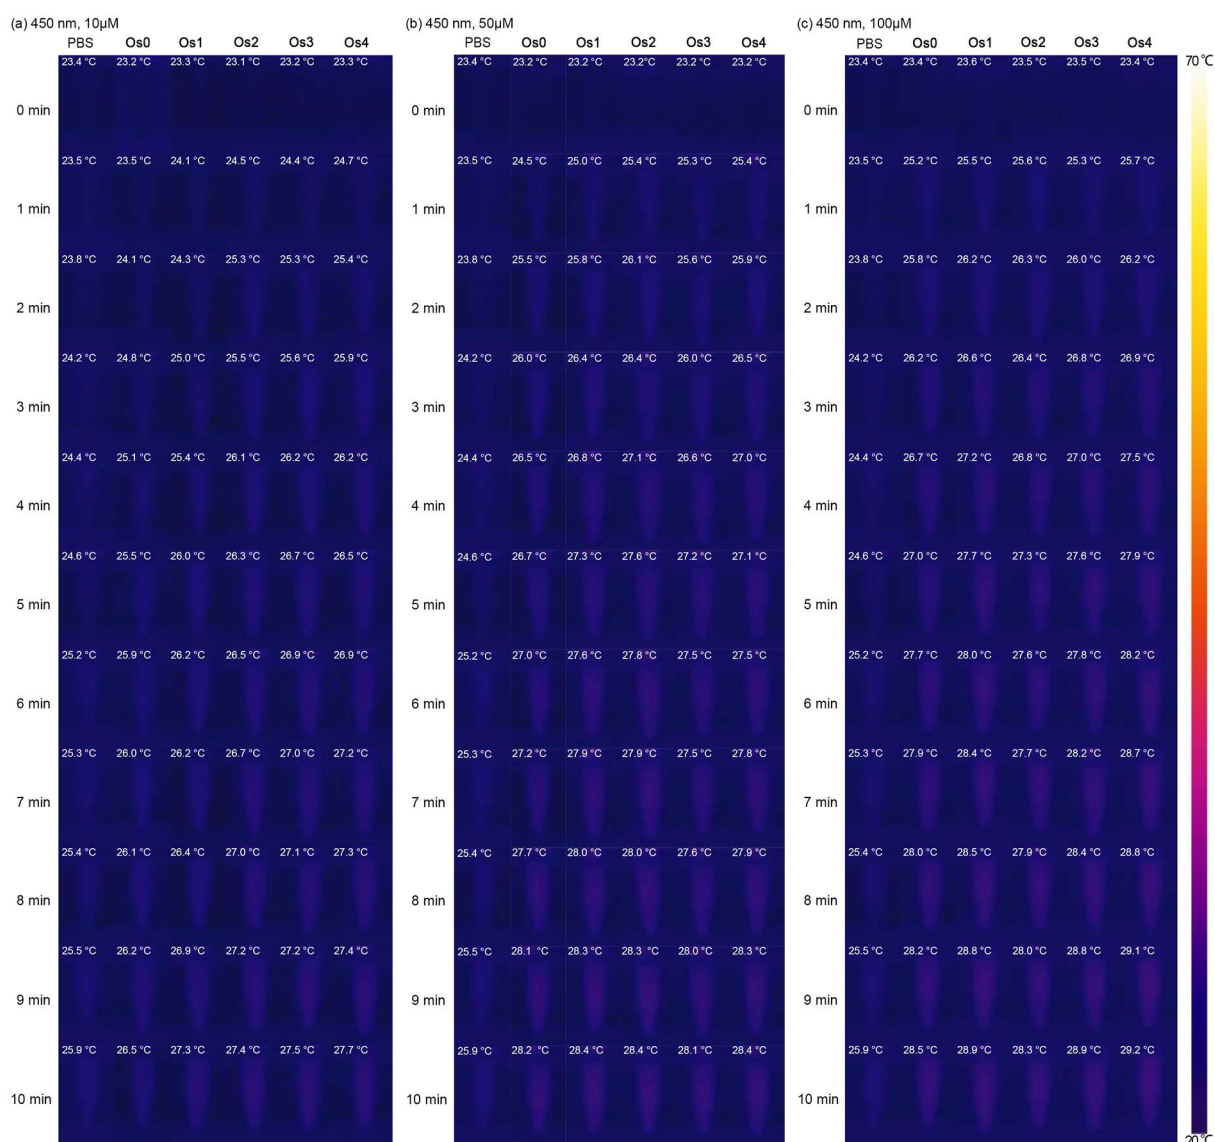

**Fig. S13.** Thermal images of PBS, **Os1–4** and  $[\text{Os}(\text{bpy})_3]^{2+}$  (**Os0**) at different concentrations in aqueous solution upon 450 nm LED ( $50 \text{ mW cm}^{-2}$ ) irradiation for 10 min at 1 min intervals. (a) 10  $\mu\text{M}$ ; (b) 50  $\mu\text{M}$ ; (c) 100  $\mu\text{M}$ .

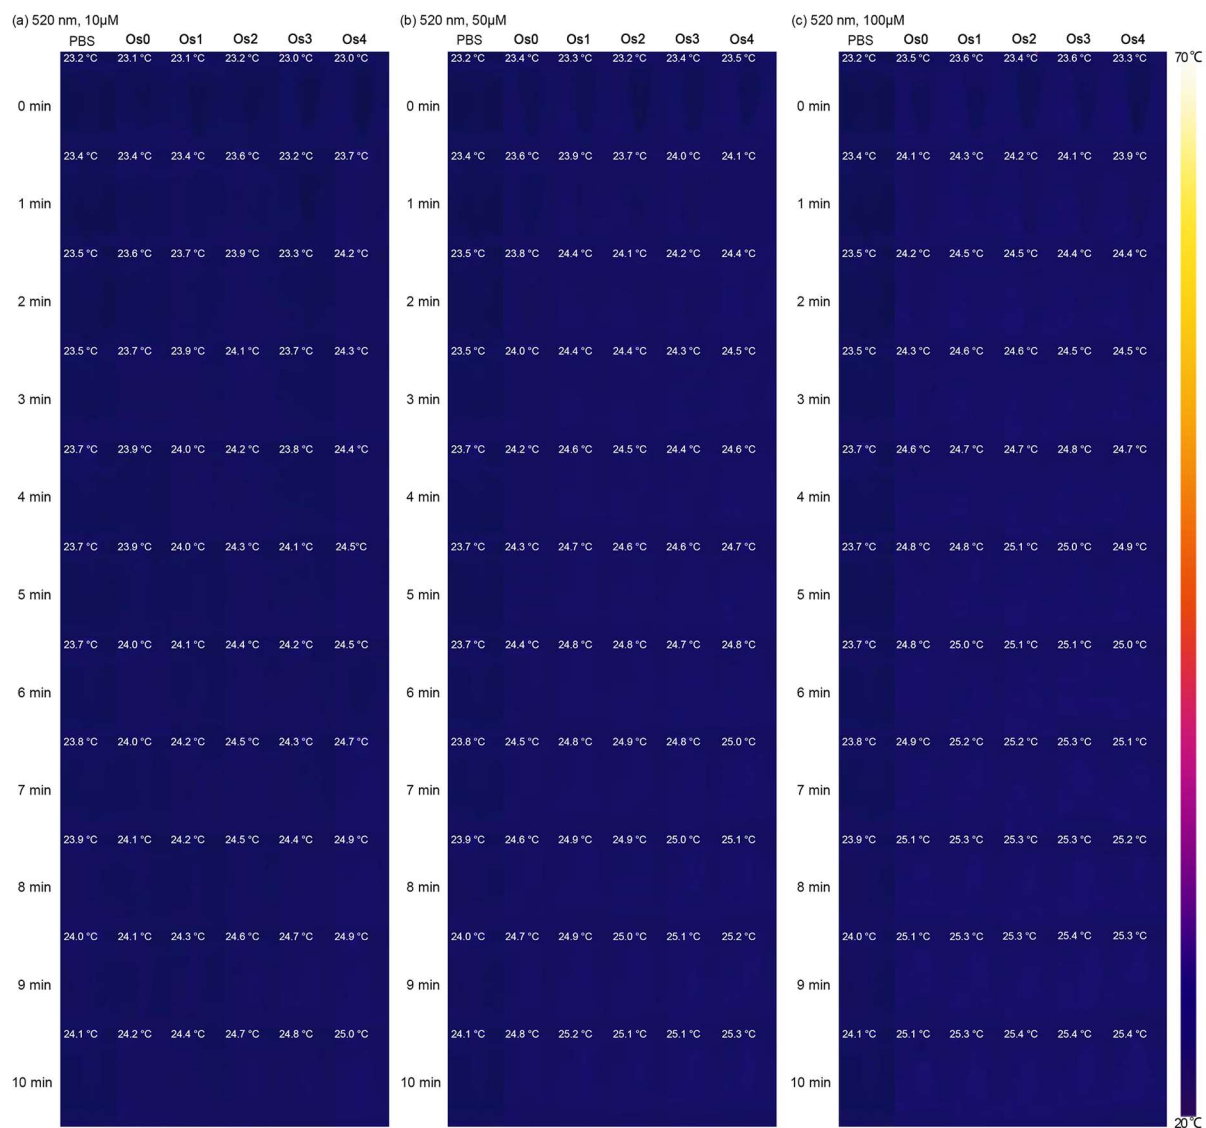

**Fig. S14.** Thermal images of PBS, Os1–4 and  $[\text{Os}(\text{bpy})_3]^{2+}$  (Os0) at different concentrations in aqueous solution upon 520 nm LED ( $50 \text{ mW cm}^{-2}$ ) irradiation for 10 min at 1 min intervals. (a) 10  $\mu\text{M}$ ; (b) 50  $\mu\text{M}$ ; (c) 100  $\mu\text{M}$ .



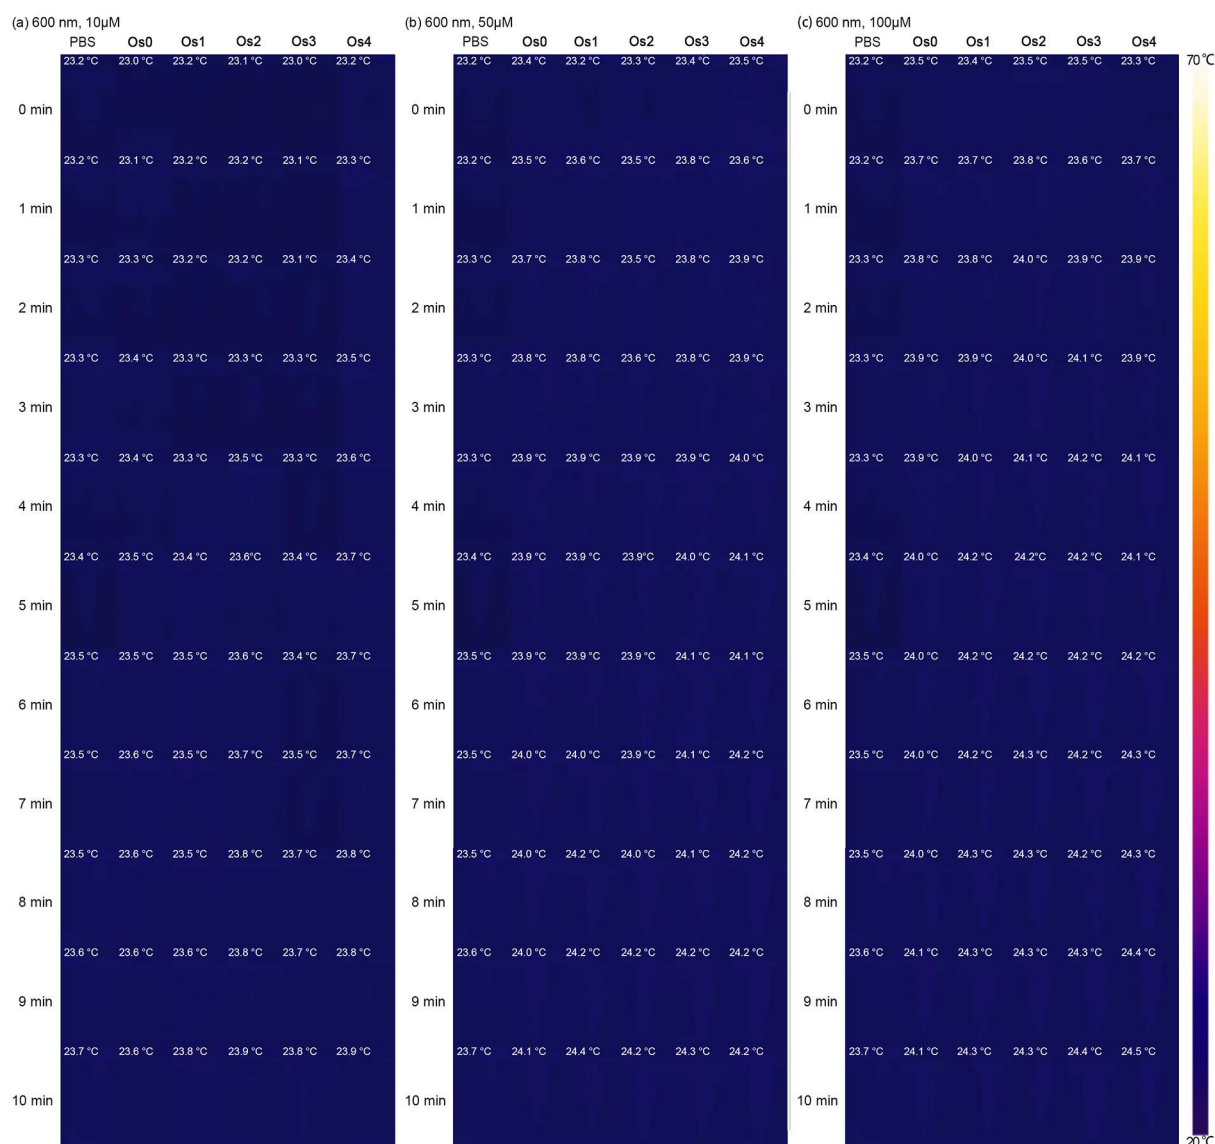

**Fig. S15.** Thermal images of PBS, **Os1–4** and  $[\text{Os}(\text{bpy})_3]^{2+}$  (**Os0**) at different concentrations in aqueous solution upon 600 nm LED ( $50 \text{ mW cm}^{-2}$ ) irradiation for 10 min at 1 min intervals. (a) 10  $\mu\text{M}$ ; (b) 50  $\mu\text{M}$ ; (c) 100  $\mu\text{M}$ .

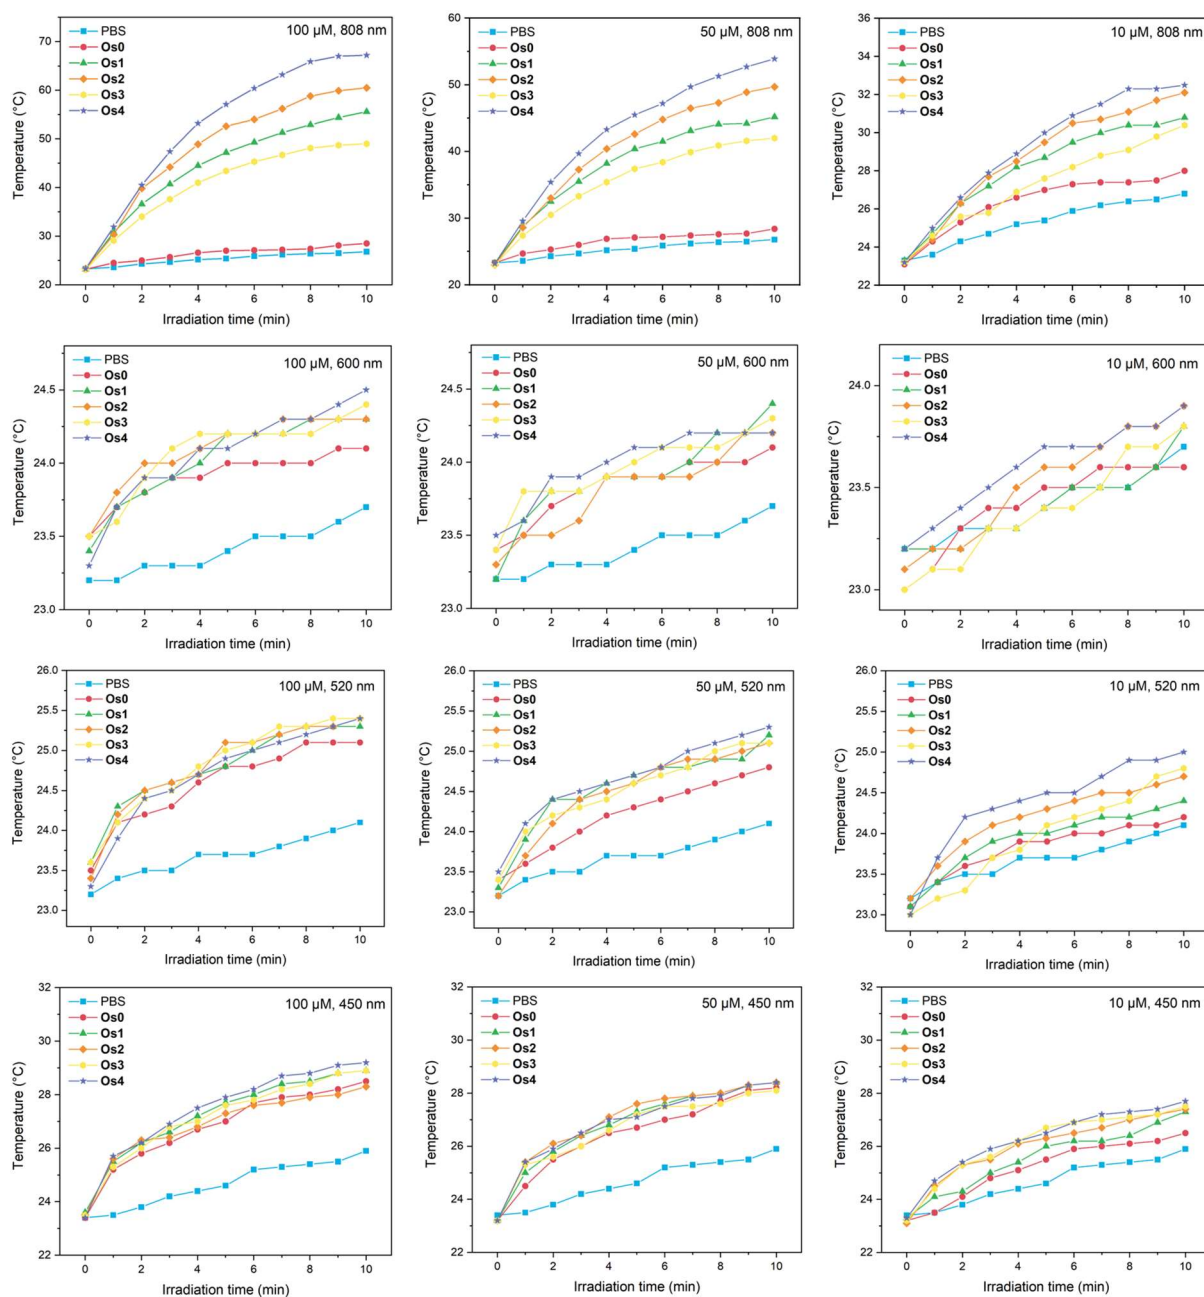

**Fig. S16.** The temperature-rising curves of PBS, **Os1–4** and  $[\text{Os}(\text{bpy})_3]^{2+}$  (**Os0**) aqueous solution (100  $\mu\text{M}$ , 50  $\mu\text{M}$ , and 10  $\mu\text{M}$ ) upon irradiation of 450, 520, and 600 nm LED (50  $\text{mW cm}^{-2}$ ) and 808 nm LPL (100  $\text{mW cm}^{-2}$ ) for 10 min at 1 min intervals.

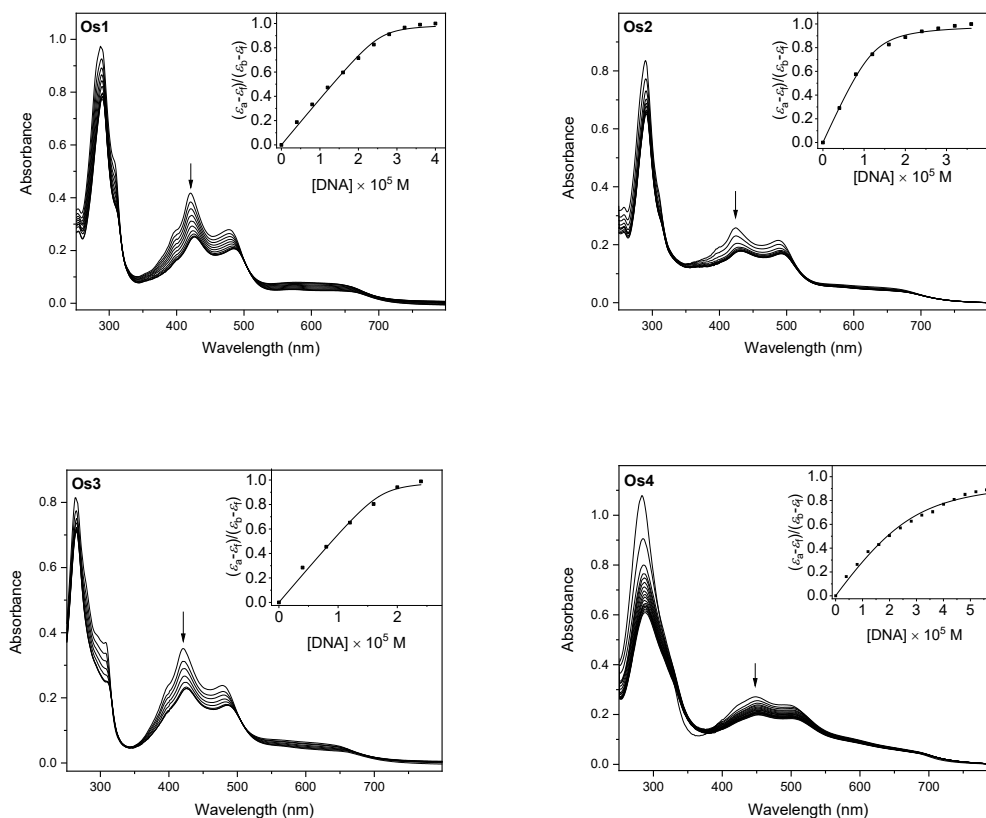

**Fig. S17.** Absorption spectra of **Os1–4** in 5 mM Tris–HCl and 50 mM NaCl buffer (pH 7.0) in the presence of increasing amounts of CT-DNA. Insets show the nonlinear fitting by which the binding constants  $K_b$  were calculated. The binding sizes  $s$  for **Os1–4** are  $1.25 \pm 0.03$ ,  $2.03 \pm 0.11$ ,  $1.66 \pm 0.07$ , and  $2.71 \pm 0.14$ , respectively.

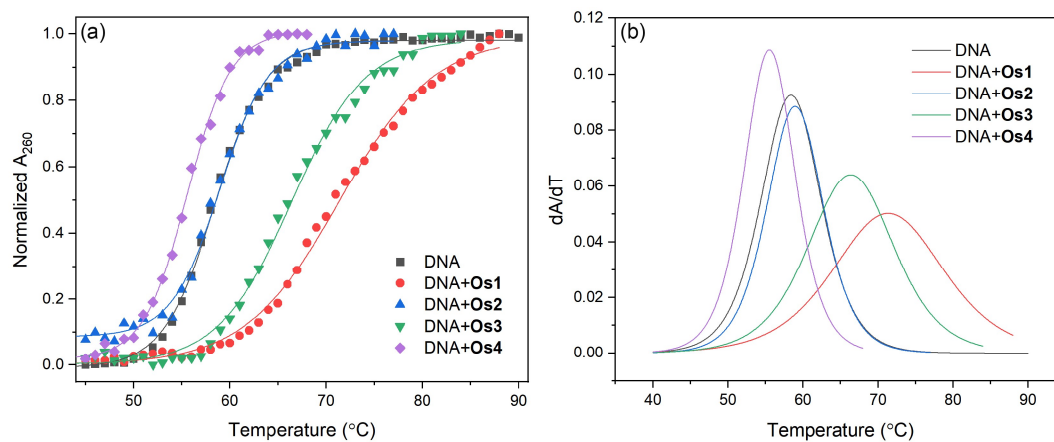

**Fig. S18.** The melting curves of CT-DNA (100  $\mu\text{M}$ ) at 260 nm in the absence and the presence of **Os1–4** (10  $\mu\text{M}$ ) in PBS (a) and first derivative of melting curves (b).

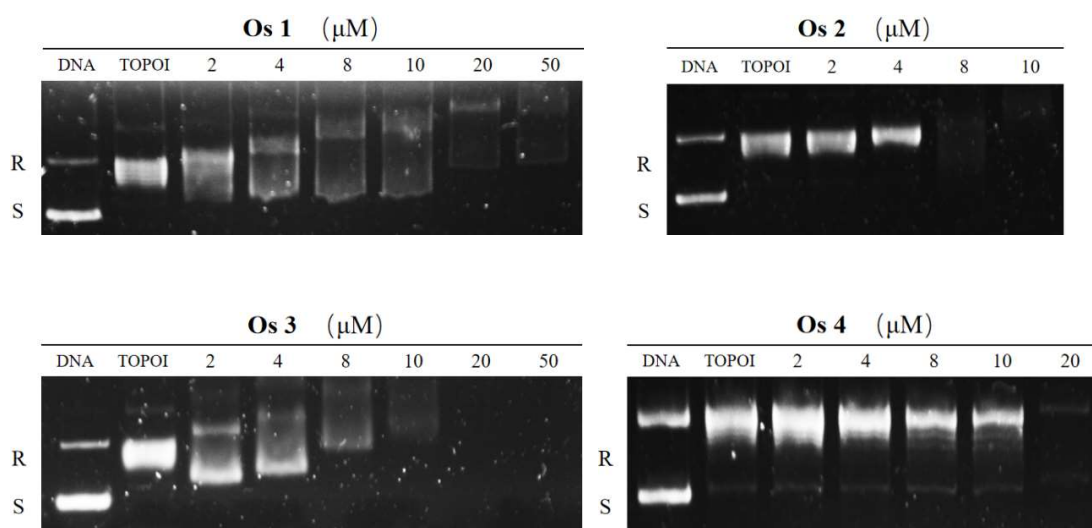

**Fig. S19.** Effects of different concentration of **Os1–4** on the activity of DNA topoisomerase I (TopoI).

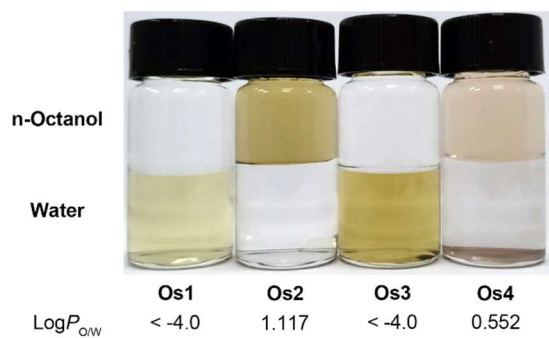

**Fig. S20.** Octanol/water partition coefficients ( $\log P_{\text{o/w}}$ ) of **Os1–4** ( $10 \mu\text{M}$  in total) at  $25 \text{ }^\circ\text{C}$ .

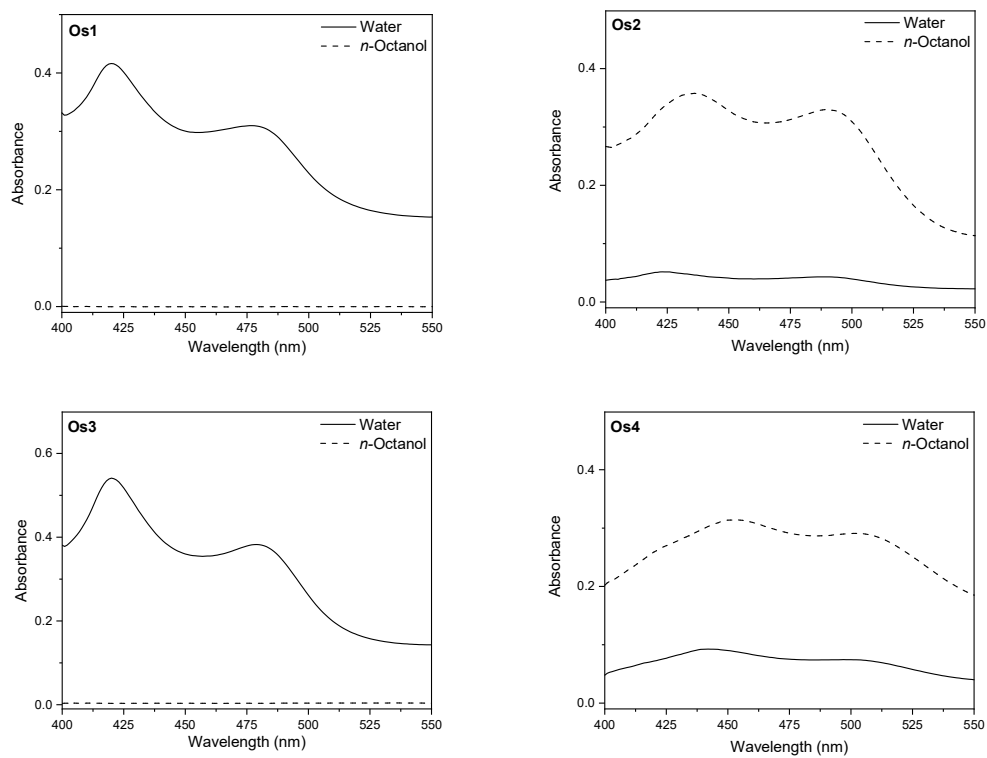

**Fig. S21.** Absorption spectra of **Os1–4** in the *n*-octanol and water phase (10  $\mu$ M in total), by which the partition coefficients ( $\log P_{o/w}$ ) were calculated.

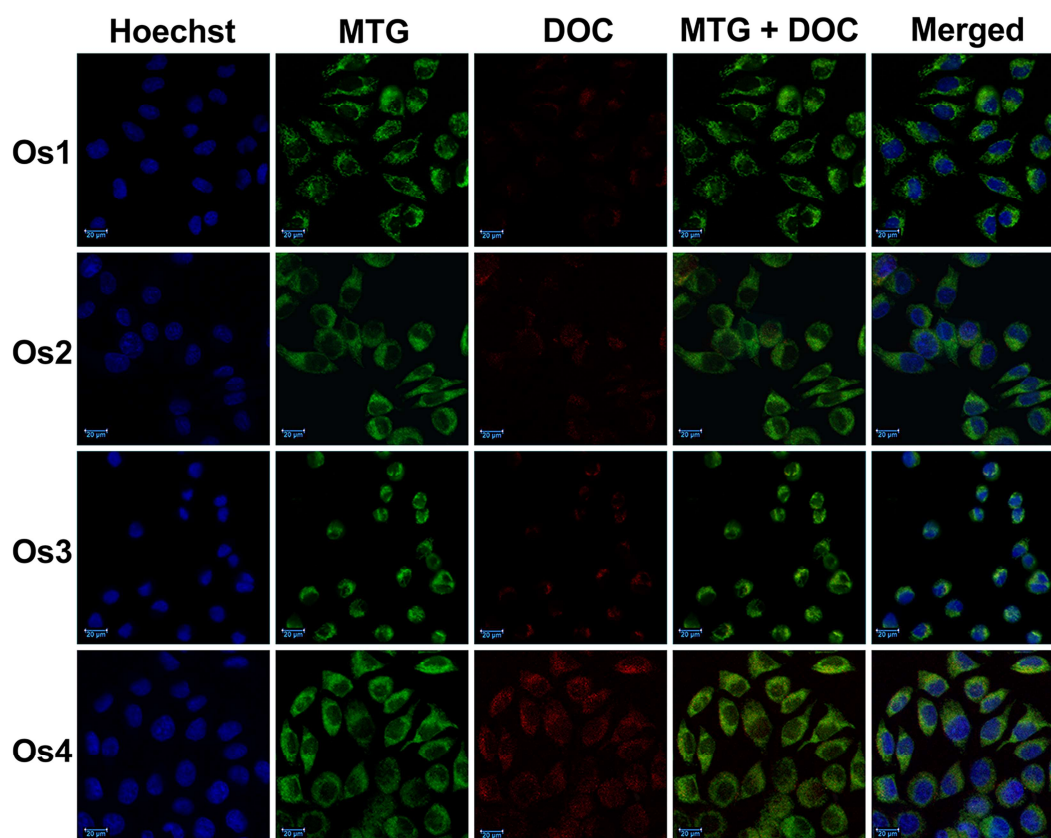

**Fig. S22.** Cellular colocalization of **Os4** with Hoechst 33342 (Hoechst) and MitoTracker Green (MTG) in A375 cells by CLSM.

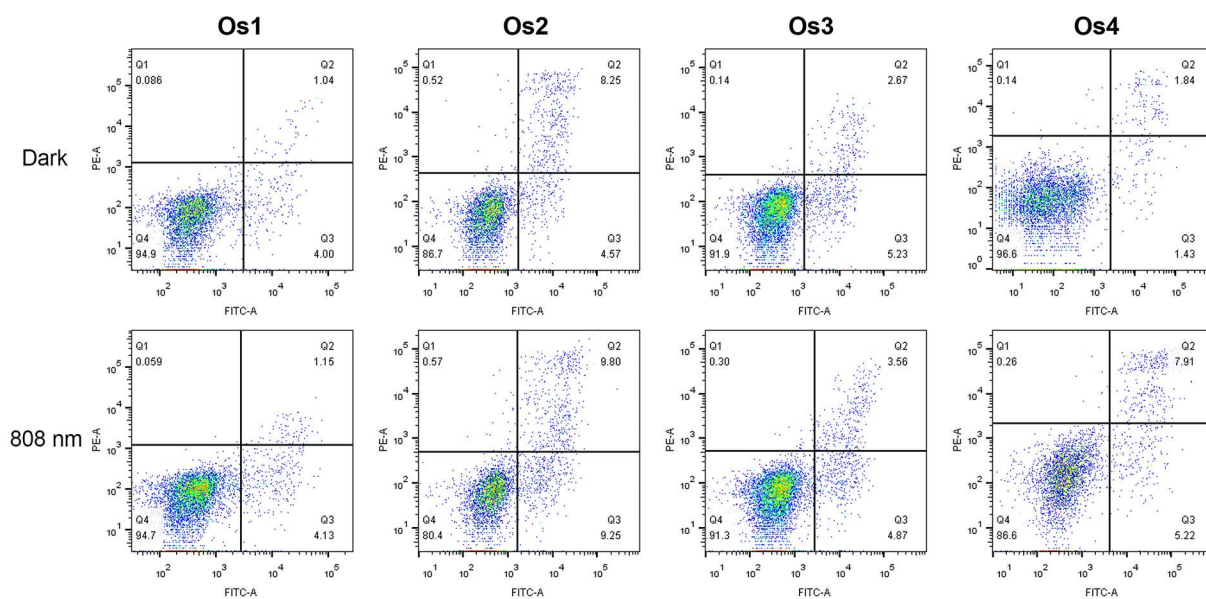

**Fig. S23.** Cytotoxicity of **Os1–4** towards A375 cell lines in the dark and under irradiation of 808 nm LPL ( $100 \text{ mW cm}^{-2}$ ) tested by flow cytometry. The cell numbers and light doses ( $30 \text{ J cm}^{-2}$ ) were consistent with the CCK-8 experiment.

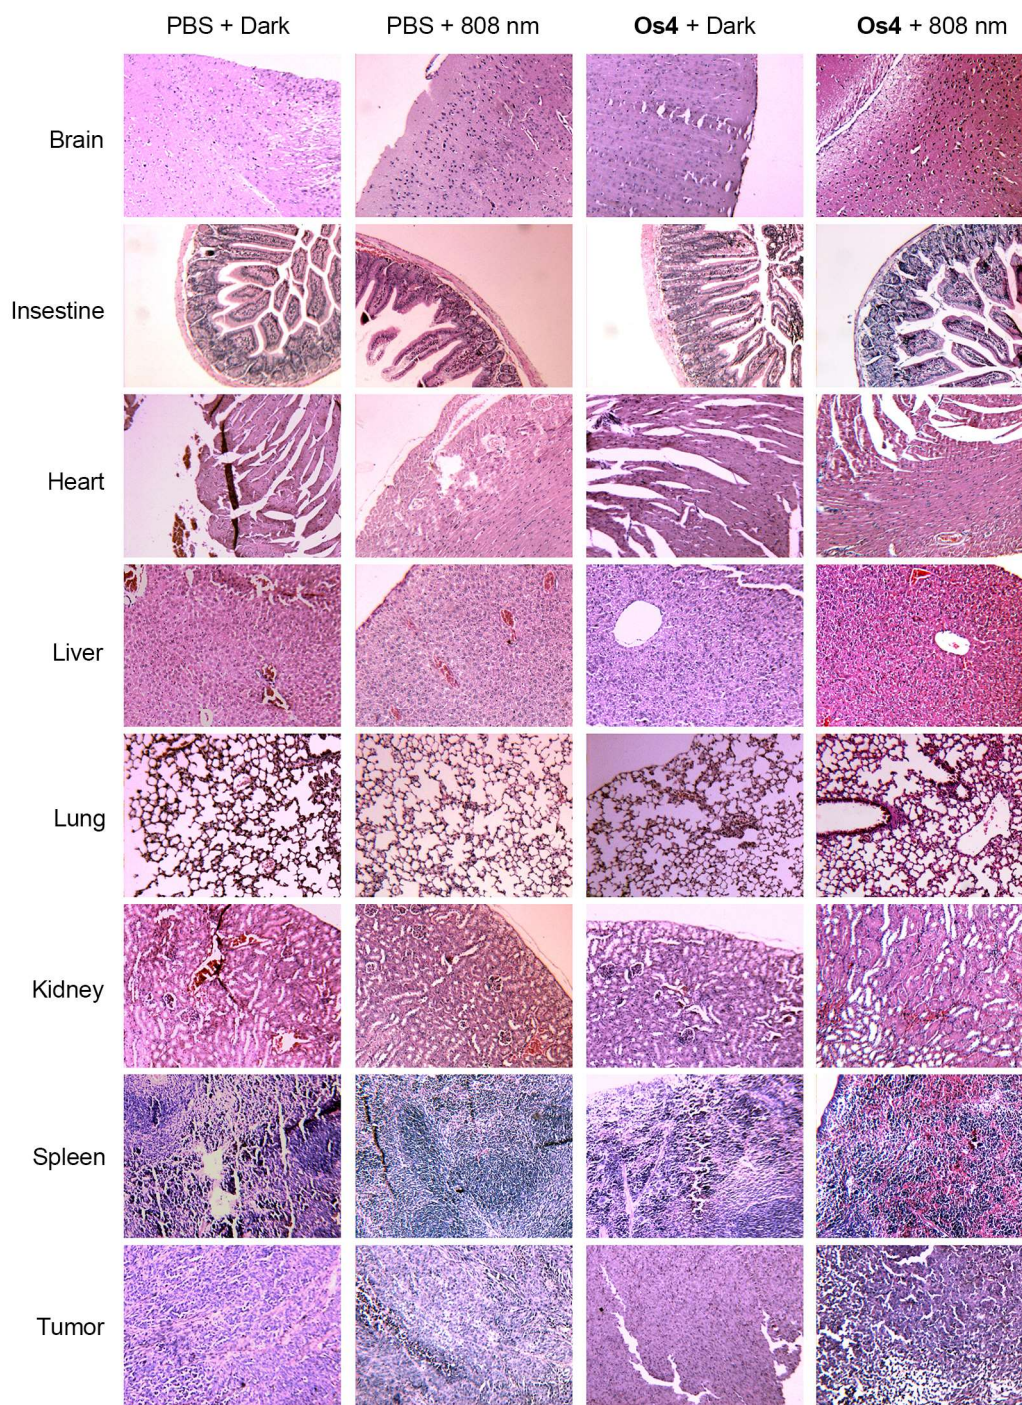

**Fig. S24.** H&E staining of organ slices from different groups.



## 5. Supplementary Tables

**Table S1.** Photophysical and Electrochemical Data for Os(II) complexes

| DOC        | $\lambda_{\text{abs}}/\text{nm}^{\text{a}}$ ( $\epsilon/\times 10^4 \text{ M}^{-1} \text{ cm}^{-1}$ ) | $\lambda_{\text{em}}/\text{nm}^{\text{b}}$ | $E_{\text{ox}}/\text{V}^{\text{c}}$ | $E_{\text{red}}/\text{V}^{\text{d}}$ | $\Delta E/\text{V}^{\text{e}}$ |
|------------|-------------------------------------------------------------------------------------------------------|--------------------------------------------|-------------------------------------|--------------------------------------|--------------------------------|
| <b>Os1</b> | 287 (9.75), 397 (2.76), 420 (4.22), 478 (2.87), 631 (0.79)                                            | 714, 808                                   | +0.59                               | -0.43, -1.08, -1.83                  | 1.02                           |
| <b>Os2</b> | 289 (13.69), 399 (3.13), 422 (4.25), 487 (3.24), 659 (0.81)                                           | 732, 794                                   | +0.51                               | -0.42, -1.06, -1.87                  | 0.93                           |
| <b>Os3</b> | 264 (8.15), 398 (2.33), 421 (3.49), 479 (2.40), 627 (0.60)                                            | 708, 811                                   | +0.58                               | -0.44, -1.04, -1.83                  | 1.02                           |
| <b>Os4</b> | 279 (15.56), 400 (2.65), 444 (3.75), 495 (3.02), 660 (0.74)                                           | 712, 804                                   | +0.57                               | -0.56, -1.13, -1.81                  | 1.13                           |

<sup>a</sup> Maximum absorption wavelength in aqueous solution.

<sup>b</sup> Maximum emission wavelength in aqueous solution.

<sup>c</sup> Oxidation potential of Os(III)/Os(II) couple.

<sup>d</sup> Ligand-centered reduction potential of Os(II) complex.

<sup>e</sup> Potential difference obtained by  $\Delta E = E_{\text{ox}} - E_{\text{red}(\text{first})}$ .

**Table S2.** Experimental and Computational Absorption Spectral Data of Os(II) complexes, together with the Calculated Excitation Energies ( $\Delta E$ ), Oscillator Strengths ( $f > 0.01$ ), by MN15/Lan12DZ (D3-BJ) method in Aqueous Solution (CPCM).

| DOC        | $\lambda_{\text{exp}}/\text{nm}$ ( $\epsilon/\times 10^4 \text{ M}^{-1} \text{ cm}^{-1}$ ) | $\lambda_{\text{cal}}/\text{nm}$ | $f$    | $\Delta E/\text{eV}$ | Excited State | Character     |
|------------|--------------------------------------------------------------------------------------------|----------------------------------|--------|----------------------|---------------|---------------|
| <b>Os1</b> | 631(0.79)                                                                                  | 568.03                           | 0.266  | 2.18                 | S3            | MLCT/IL(pppp) |
|            |                                                                                            | 478(2.87)                        | 444.26 | 0.016                | 2.79          | S16           |
|            | 420(4.22)                                                                                  | 444.23                           | 0.028  | 2.79                 | S17           | MLCT          |
|            |                                                                                            | 443.07                           | 0.236  | 2.80                 | S18           | MLCT/LLCT     |
|            |                                                                                            | 424.59                           | 0.012  | 2.92                 | S21           | MLCT          |
|            |                                                                                            | 418.65                           | 0.529  | 2.96                 | S22           | MLCT          |
|            |                                                                                            | 415.93                           | 0.162  | 2.98                 | S24           | MLCT          |
|            |                                                                                            | 415.79                           | 0.228  | 2.98                 | S25           | MLCT          |
| <b>Os2</b> | 659(0.81)                                                                                  | 595.77                           | 0.251  | 2.08                 | S3            | MLCT/IL(pppp) |
|            |                                                                                            | 487(3.24)                        | 478.88 | 0.010                | 2.59          | S14           |
|            | 422(4.25)                                                                                  | 450.11                           | 0.326  | 2.75                 | S16           | MLCT          |
|            |                                                                                            | 448.38                           | 0.029  | 2.77                 | S18           | MLCT          |
|            |                                                                                            | 448.31                           | 0.047  | 2.77                 | S19           | MLCT          |
|            |                                                                                            | 435.95                           | 0.099  | 2.84                 | S20           | MLCT          |
|            |                                                                                            | 427.27                           | 0.402  | 2.90                 | S22           | MLCT          |
|            |                                                                                            | 421.82                           | 0.204  | 2.94                 | S24           | MLCT          |
|            |                                                                                            | 421.68                           | 0.289  | 2.94                 | S25           | MLCT          |
|            |                                                                                            | 404.05                           | 0.172  | 3.07                 | S26           | MLCT          |
| <b>Os3</b> | 627(0.60)                                                                                  | 569.98                           | 0.277  | 2.18                 | S3            | MLCT/IL(pppp) |
|            |                                                                                            | 479(2.40)                        | 439.87 | 0.313                | 2.82          | S16           |
|            | 421(3.49)                                                                                  | 439.17                           | 0.028  | 2.82                 | S17           | MLCT          |
|            |                                                                                            | 439.11                           | 0.042  | 2.82                 | S18           | MLCT          |
|            |                                                                                            | 423.69                           | 0.017  | 2.93                 | S20           | MLCT          |
|            |                                                                                            | 417.05                           | 0.392  | 2.97                 | S22           | MLCT          |
|            |                                                                                            | 413.15                           | 0.119  | 3.00                 | S24           | MLCT          |
|            |                                                                                            | 413.40                           | 0.180  | 3.00                 | S25           | MLCT          |
|            |                                                                                            | 403.11                           | 0.128  | 3.08                 | S26           | MLCT          |
|            |                                                                                            | 396.15                           | 0.217  | 3.13                 | S28           | MLCT/LLCT     |
| <b>Os4</b> | 660(0.74)                                                                                  | 586.39                           | 0.289  | 2.11                 | S3            | MLCT/IL(pppp) |
|            |                                                                                            | 495(3.02)                        | 513.58 | 0.012                | 2.41          | S7            |
|            | 444(3.75)                                                                                  | 490.37                           | 0.017  | 2.53                 | S11           | MLCT          |
|            |                                                                                            | 474.94                           | 0.041  | 2.61                 | S14           | MLCT/LLCT     |
|            |                                                                                            | 474.39                           | 0.015  | 2.61                 | S15           | MLCT/LLCT     |
|            |                                                                                            | 455.49                           | 0.069  | 2.72                 | S16           | MLCT          |
|            |                                                                                            | 455.44                           | 0.058  | 2.72                 | S17           | MLCT          |
|            |                                                                                            | 452.80                           | 0.428  | 2.74                 | S18           | MLCT          |
|            |                                                                                            | 431.18                           | 0.196  | 2.88                 | S20           | MLCT          |
|            |                                                                                            | 430.08                           | 0.161  | 2.88                 | S22           | MLCT          |
|            |                                                                                            | 429.55                           | 0.269  | 2.89                 | S23           | MLCT          |
|            |                                                                                            | 429.37                           | 0.388  | 2.89                 | S24           | MLCT          |
|            |                                                                                            | 415.45                           | 0.263  | 2.98                 | S26           | MLCT          |
|            |                                                                                            | 408.01                           | 0.192  | 3.04                 | S28           | MLCT          |
| 407.92     | 0.156                                                                                      | 3.04                             | S29    | MLCT                 |               |               |
| 405.68     | 0.371                                                                                      | 3.06                             | S30    | MLCT/LLCT            |               |               |

## 6. <sup>1</sup>H NMR, Mass, and FT-IR Spectra of DOCs Os1-4

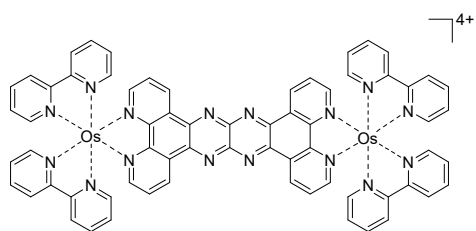

Os1

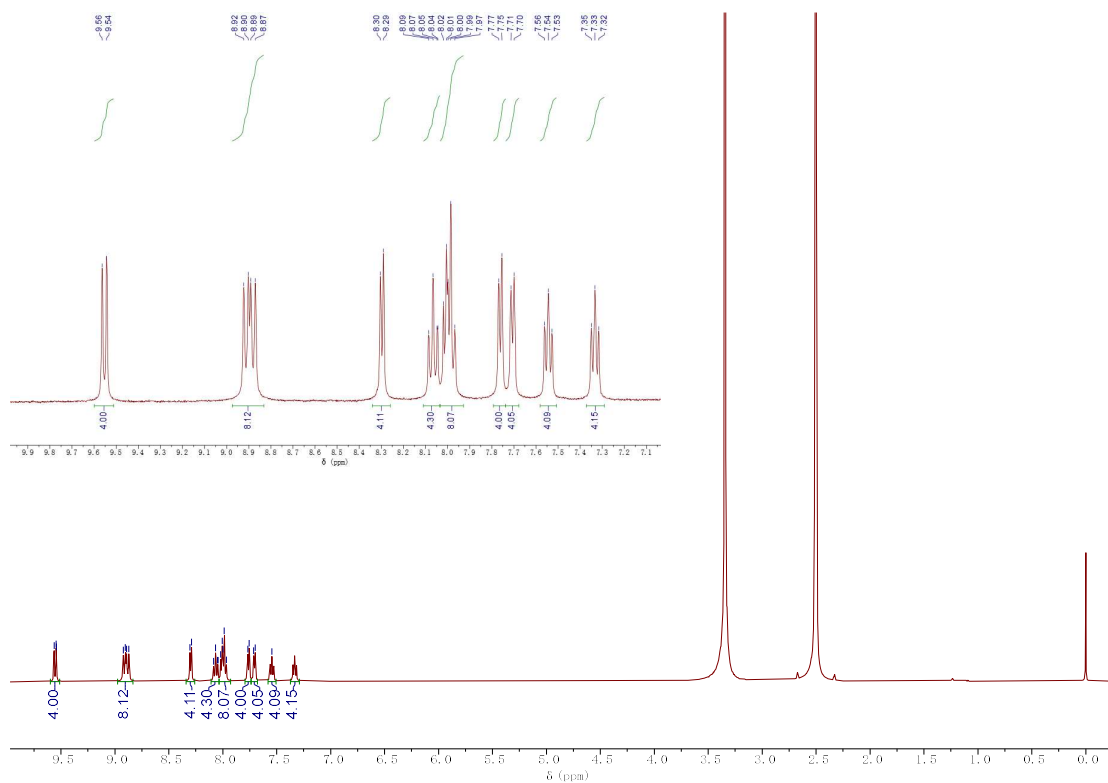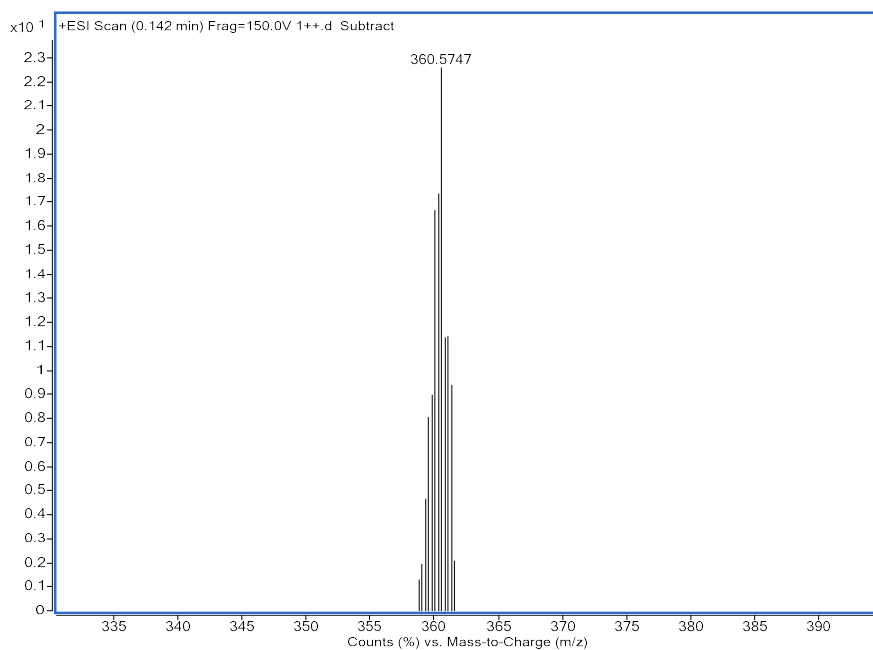

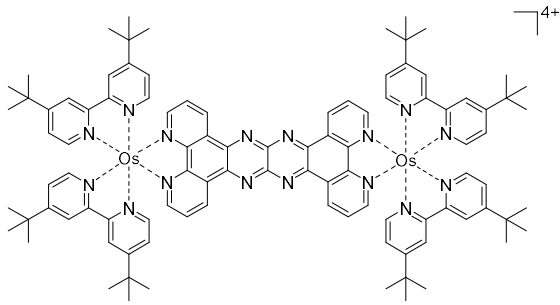

Os2

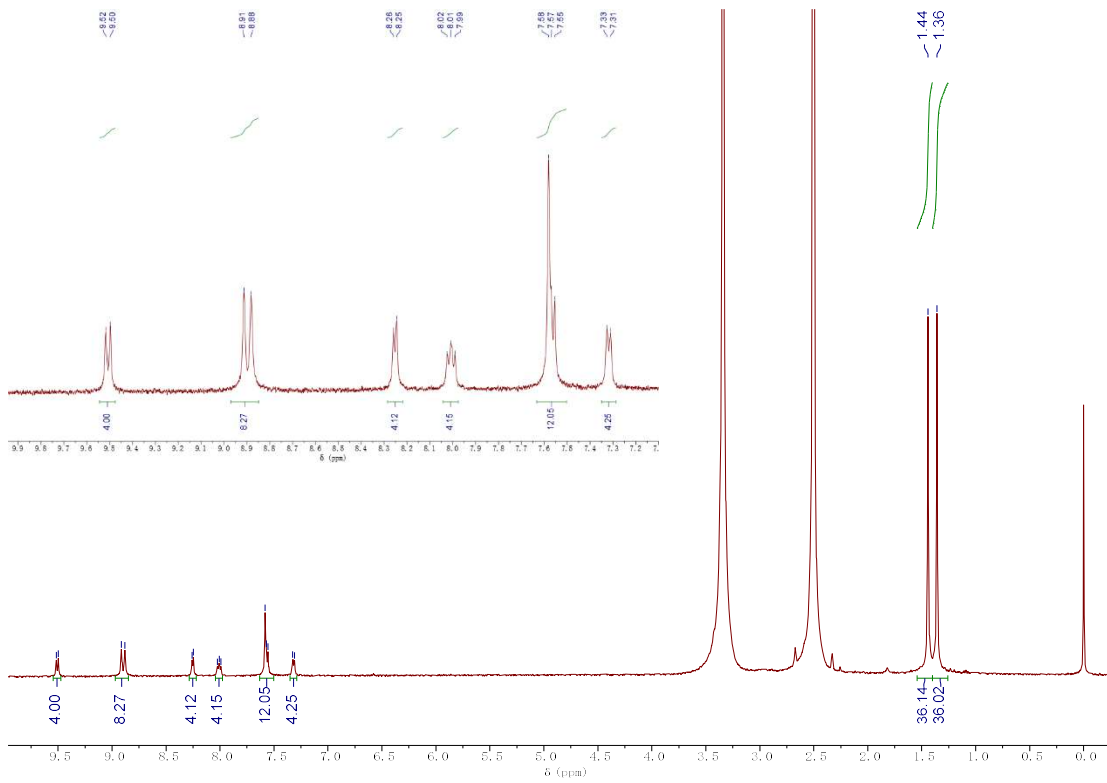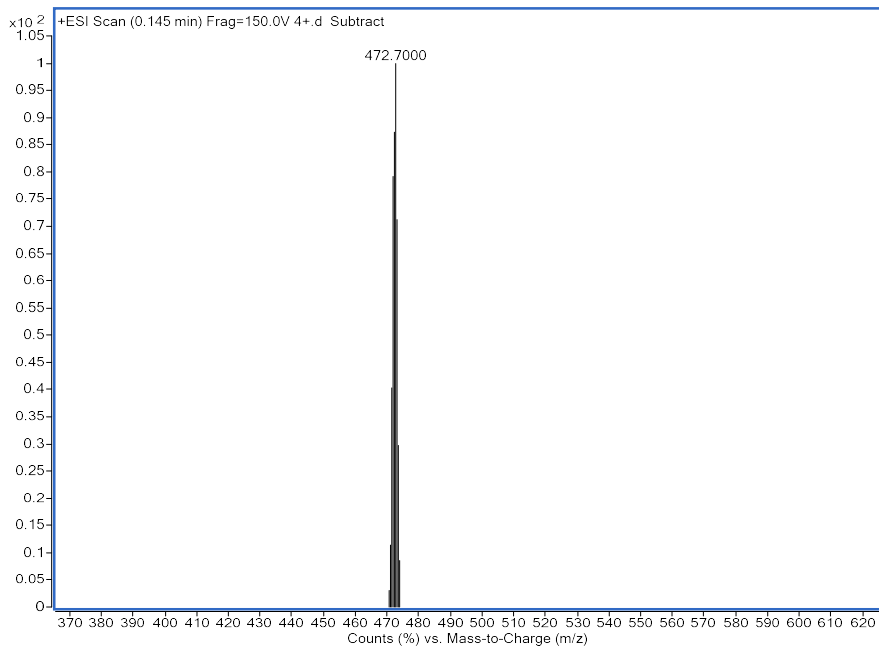

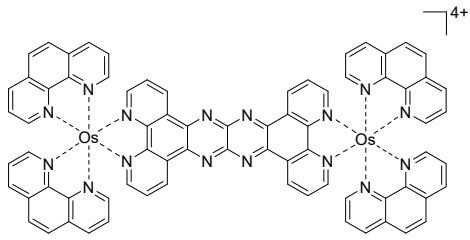

**Os3**

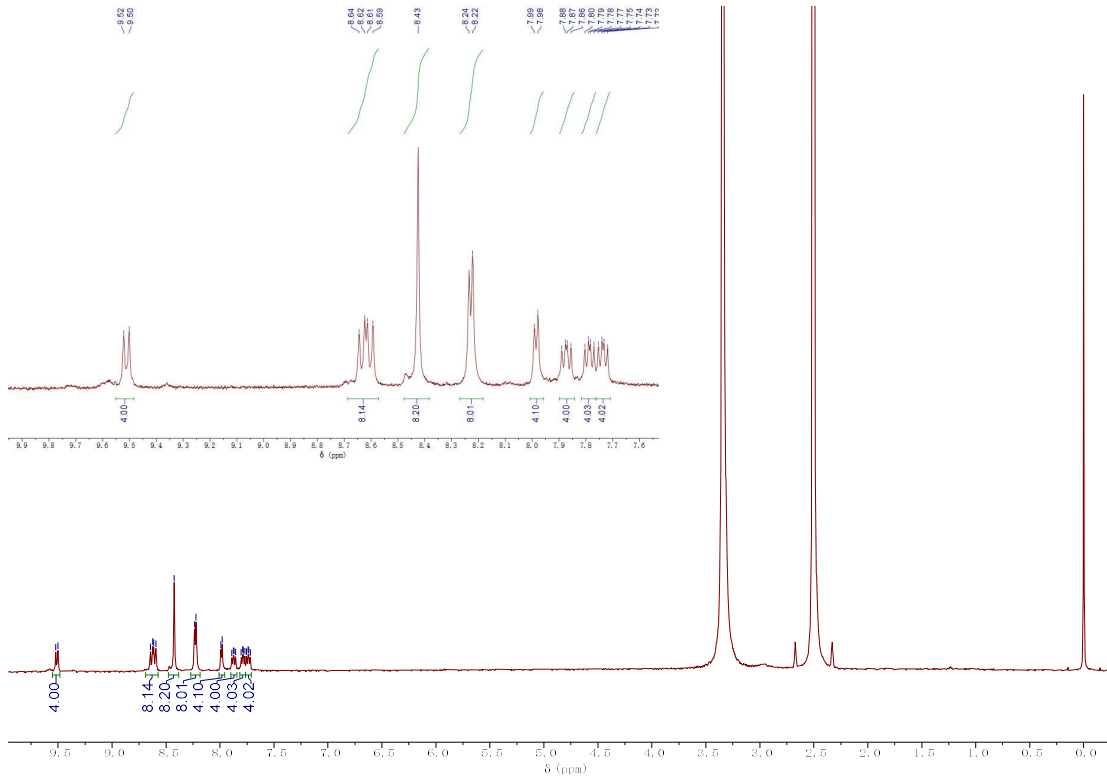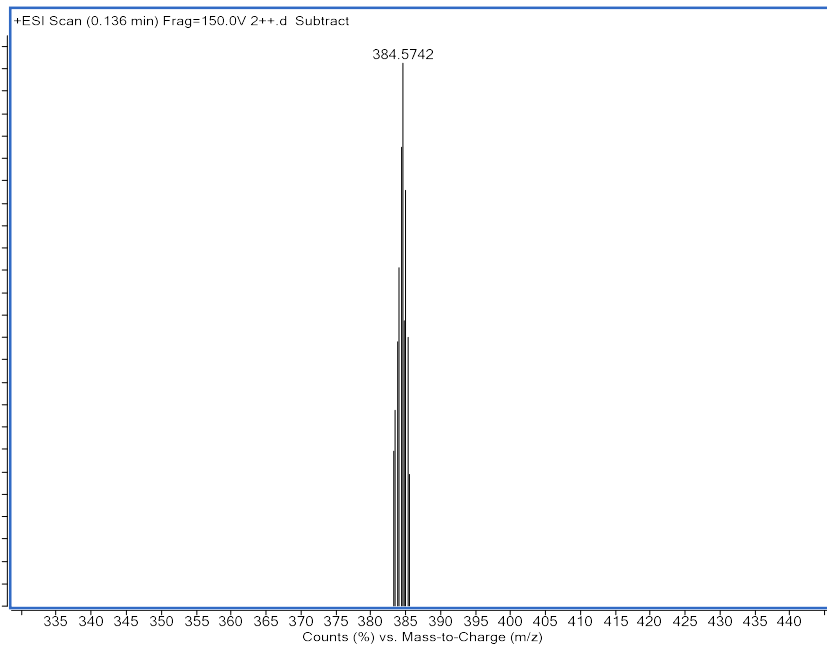

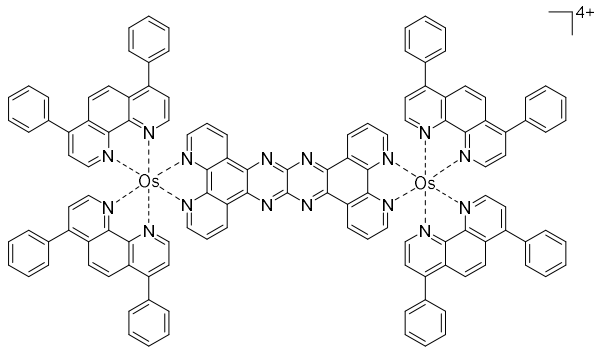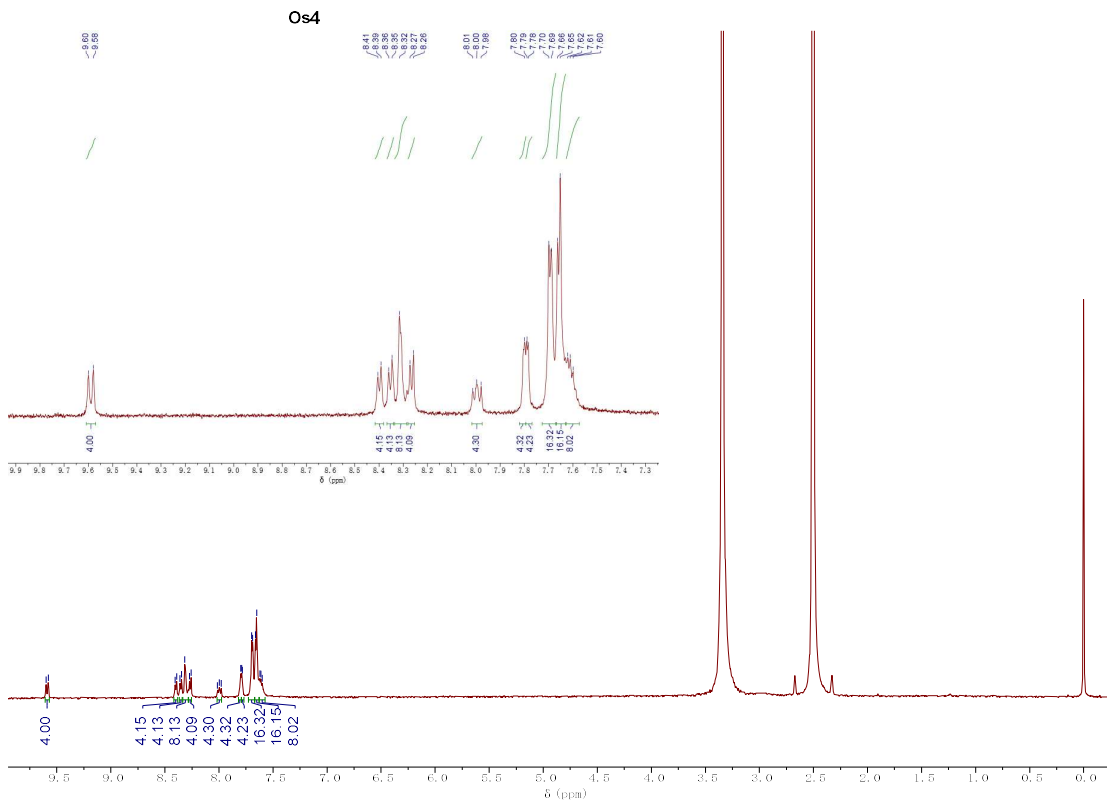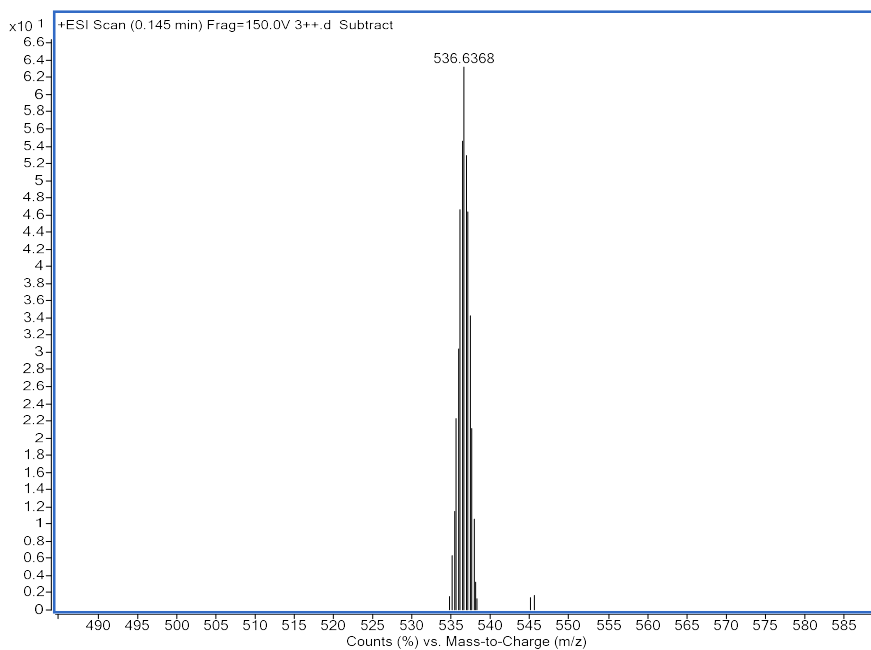

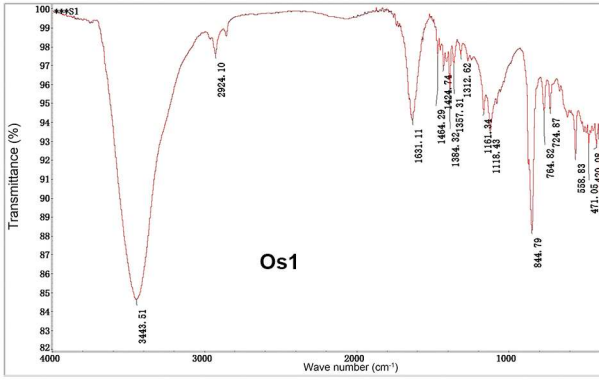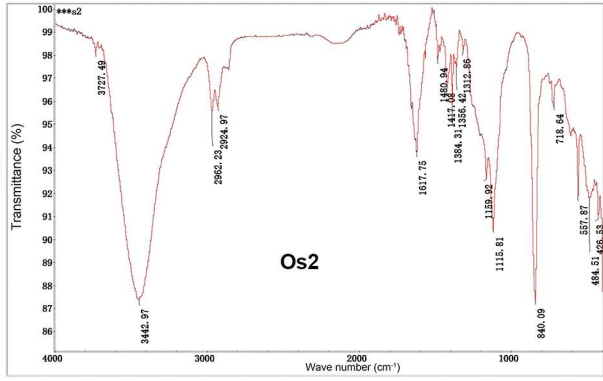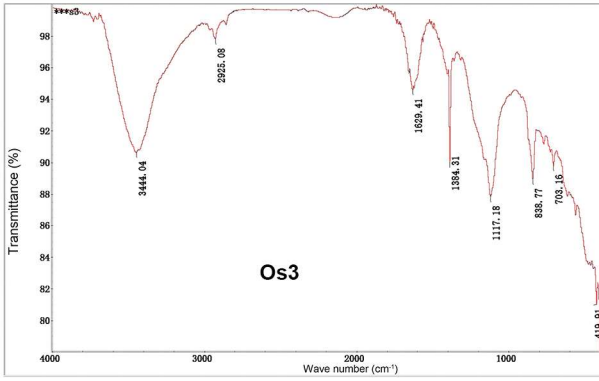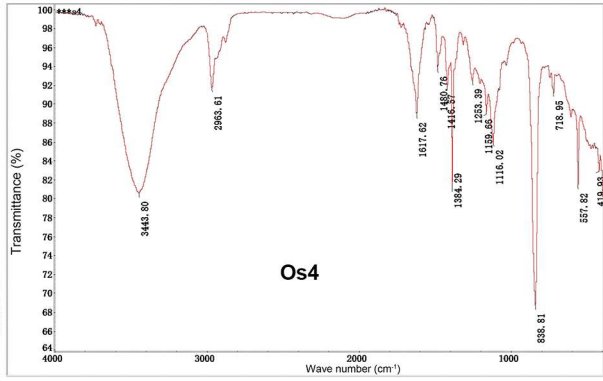

**7. Cartesian coordinates of DFT/TDDFT (MN15/Lan12dz, GD3BJ, CPCM for water, Gaussian 16) optimized Os1–4 for the ground state (S0), first excited singlet state (S1) and first excited triplet state (T1).**

| Os1 | S0       |          |          | S1       |           |           | T1       |          |          |   |
|-----|----------|----------|----------|----------|-----------|-----------|----------|----------|----------|---|
|     | Symbol   | X        | Y        | Z        | X         | Y         | Z        | X        | Y        | Z |
| Os  | 7.609402 | 0        | 0        | 7.616889 | -0.000009 | -0.000005 | -7.62334 | 0        | 0        | 0 |
| Os  | -7.6094  | 0        | 0        | -7.61906 | 0.000003  | 0.000006  | 7.623336 | 0        | 0        | 0 |
| N   | 1.172821 | 0.006504 | 1.417174 | 1.178266 | 0.026611  | 1.425996  | -1.17019 | 0.018332 | 1.425448 |   |
| N   | 1.172821 | -0.0065  | -1.41717 | 1.178264 | -0.026848 | -1.425994 | -1.17019 | -0.01833 | -1.42545 |   |
| N   | 6.018728 | -0.0023  | 1.314472 | 6.044149 | 0.012987  | 1.3353    | -6.03371 | 0.077471 | 1.323485 |   |
| N   | 6.018728 | 0.002298 | -1.31447 | 6.044146 | -0.013118 | -1.335304 | -6.03371 | -0.07747 | -1.32349 |   |
| N   | 7.714404 | 2.036723 | 0.301883 | 7.668892 | 2.03023   | 0.3596    | -7.69765 | -2.00159 | 0.491997 |   |
| N   | 9.098107 | 0.132    | 1.416241 | 9.147572 | 0.128984  | 1.382223  | -9.1359  | -0.02223 | 1.400101 |   |
| N   | 7.714404 | -2.03672 | -0.30188 | 7.669047 | -2.030241 | -0.359622 | -7.69765 | 2.001586 | -0.492   |   |
| N   | 9.098107 | -0.132   | -1.41624 | 9.147586 | -0.128877 | -1.38223  | -9.1359  | 0.022229 | -1.4001  |   |
| N   | -7.7144  | -2.03672 | 0.301883 | -7.71554 | -2.032033 | 0.324242  | 7.697645 | 2.001586 | 0.491997 |   |
| N   | -9.09811 | -0.132   | 1.416241 | -9.10431 | -0.121731 | 1.418579  | 9.135902 | 0.022229 | 1.400101 |   |
| N   | -7.7144  | 2.036723 | -0.30188 | -7.7154  | 2.032045  | -0.324232 | 7.697645 | -2.00159 | -0.492   |   |
| N   | -9.09811 | 0.132    | -1.41624 | -9.10431 | 0.121835  | -1.418565 | 9.135902 | -0.02223 | -1.4001  |   |
| N   | -1.17282 | -0.0065  | 1.417174 | -1.16452 | 0.0133    | 1.417303  | 1.170188 | -0.01833 | 1.425448 |   |
| N   | -1.17282 | 0.006504 | -1.41717 | -1.16452 | -0.013523 | -1.417298 | 1.170188 | 0.018332 | -1.42545 |   |
| N   | -6.01873 | -0.0023  | -1.31447 | -6.02907 | -0.018983 | -1.319487 | 6.03371  | 0.077471 | -1.32349 |   |
| N   | -6.01873 | 0.002298 | 1.314472 | -6.02907 | 0.018895  | 1.319497  | 6.03371  | -0.07747 | 1.323485 |   |
| C   | 2.316008 | -0.00638 | -0.72816 | 2.330505 | -0.016682 | -0.724827 | -2.33157 | -0.01596 | -0.7132  |   |
| C   | 2.316008 | 0.00638  | 0.728163 | 2.330506 | 0.016453  | 0.724829  | -2.33157 | 0.015956 | 0.713195 |   |
| C   | 3.586483 | 0.014914 | 1.457234 | 3.595572 | 0.034107  | 1.438918  | -3.59269 | 0.04897  | 1.438244 |   |
| C   | 4.781397 | 0.004906 | 0.722457 | 4.809777 | 0.00854   | 0.70825   | -4.79994 | 0.033866 | 0.71634  |   |
| C   | 4.781397 | -0.00491 | -0.72246 | 4.809776 | -0.008711 | -0.708252 | -4.79994 | -0.03387 | -0.71634 |   |
| C   | 3.586483 | -0.01491 | -1.45723 | 3.59557  | -0.034318 | -1.438918 | -3.59269 | -0.04897 | -1.43824 |   |
| C   | 3.663441 | 0.029128 | 2.864311 | 3.681828 | 0.077057  | 2.846568  | -3.67451 | 0.101276 | 2.851101 |   |
| C   | 4.926991 | 0.03267  | 3.466363 | 4.936112 | 0.09996   | 3.467875  | -4.92943 | 0.133141 | 3.460849 |   |
| C   | 6.084822 | 0.016287 | 2.669234 | 6.10432  | 0.072105  | 2.679691  | -6.09857 | 0.11764  | 2.67122  |   |
| C   | 6.084822 | -0.01629 | -2.66923 | 6.104318 | -0.072251 | -2.679694 | -6.09857 | -0.11764 | -2.67122 |   |
| C   | 4.926991 | -0.03267 | -3.46636 | 4.93611  | -0.100155 | -3.467877 | -4.92943 | -0.13314 | -3.46085 |   |
| C   | 3.663441 | -0.02913 | -2.86431 | 3.681827 | -0.07728  | -2.846568 | -3.67451 | -0.10128 | -2.8511  |   |
| C   | 7.952753 | 4.767652 | 0.881906 | 7.835866 | 4.73536   | 1.012796  | -7.89123 | -4.66174 | 1.327721 |   |
| C   | 7.011471 | 4.31463  | -0.06022 | 6.86552  | 4.281289  | 0.103789  | -6.92999 | -4.28027 | 0.375214 |   |
| C   | 6.918326 | 2.945798 | -0.3242  | 6.803219 | 2.917679  | -0.195742 | -6.85693 | -2.94114 | -0.01701 |   |
| C   | 8.634808 | 2.47004  | 1.224016 | 8.613569 | 2.460097  | 1.258337  | -8.63385 | -2.36177 | 1.429552 |   |
| C   | 8.770645 | 3.831761 | 1.528763 | 8.714617 | 3.812633  | 1.600294  | -8.74832 | -3.68899 | 1.861671 |   |
| C   | 9.432245 | 1.395813 | 1.836768 | 9.455077 | 1.390865  | 1.823161  | -9.46089 | -1.24877 | 1.924198 |   |



|   |          |          |          |          |           |           |          |          |          |
|---|----------|----------|----------|----------|-----------|-----------|----------|----------|----------|
| C | 9.776149 | -0.93788 | 1.913759 | 9.869083 | -0.937725 | 1.812169  | -9.84081 | 1.07921  | 1.772605 |
| C | 10.80252 | -0.79058 | 2.850286 | 10.91882 | -0.78838  | 2.722975  | -10.8883 | 1.002055 | 2.694177 |
| C | 10.45462 | 1.602176 | 2.773662 | 10.5011  | 1.599293  | 2.729188  | -10.5051 | -1.38447 | 2.847577 |
| C | 11.14917 | 0.499992 | 3.289525 | 11.23879 | 0.498146  | 3.188327  | -11.2266 | -0.2484  | 3.240679 |
| C | 7.952753 | -4.76765 | -0.88191 | 7.836222 | -4.735352 | -1.012841 | -7.89123 | 4.661735 | -1.32772 |
| C | 7.011471 | -4.31463 | 0.060217 | 6.865835 | -4.281359 | -0.10384  | -6.92999 | 4.280272 | -0.37521 |
| C | 6.918326 | -2.9458  | 0.324203 | 6.803431 | -2.917757 | 0.195701  | -6.85693 | 2.941136 | 0.01701  |
| C | 8.634808 | -2.47004 | -1.22402 | 8.613763 | -2.460031 | -1.258354 | -8.63385 | 2.361774 | -1.42955 |
| C | 8.770645 | -3.83176 | -1.52876 | 8.714912 | -3.812557 | -1.600324 | -8.74832 | 3.688989 | -1.86167 |
| C | 9.432245 | -1.39581 | -1.83677 | 9.455195 | -1.390734 | -1.823166 | -9.46089 | 1.248766 | -1.9242  |
| C | 9.776149 | 0.937882 | -1.91376 | 9.869016 | 0.937889  | -1.81217  | -9.84081 | -1.07921 | -1.77261 |
| C | 10.80252 | 0.790578 | -2.85029 | 10.91877 | 0.788627  | -2.722964 | -10.8883 | -1.00206 | -2.69418 |
| C | 10.45462 | -1.60218 | -2.77366 | 10.50125 | -1.59908  | -2.729179 | -10.5051 | 1.384472 | -2.84758 |
| C | 11.14917 | -0.49999 | -3.28953 | 11.23885 | -0.497875 | -3.188311 | -11.2266 | 0.248395 | -3.24068 |
| C | -7.95275 | -4.76765 | 0.881906 | -7.93316 | -4.756865 | 0.943348  | 7.891226 | 4.661735 | 1.327721 |
| C | -7.01147 | -4.31463 | -0.06022 | -6.99863 | -4.310237 | -0.008805 | 6.929991 | 4.280272 | 0.375214 |
| C | -6.91833 | -2.9458  | -0.3242  | -6.91537 | -2.944646 | -0.291912 | 6.856932 | 2.941136 | -0.01701 |
| C | -8.63481 | -2.47004 | 1.224016 | -8.62922 | -2.459138 | 1.256226  | 8.633848 | 2.361774 | 1.429552 |
| C | -8.77065 | -3.83176 | 1.528763 | -8.75448 | -3.817561 | 1.580607  | 8.74832  | 3.688989 | 1.861671 |
| C | -9.43225 | -1.39581 | 1.836768 | -9.43125 | -1.381688 | 1.856585  | 9.460891 | 1.248766 | 1.924198 |
| C | -9.77615 | 0.937882 | 1.913759 | -9.78797 | 0.950976  | 1.902801  | 9.840805 | -1.07921 | 1.772605 |
| C | -10.8025 | 0.790578 | 2.850286 | -10.8123 | 0.810693  | 2.842423  | 10.88829 | -1.00206 | 2.694177 |
| C | -10.4546 | -1.60218 | 2.773662 | -10.4518 | -1.580992 | 2.79729   | 10.50513 | 1.384472 | 2.847577 |
| C | -11.1492 | -0.49999 | 3.289525 | -11.1517 | -0.475942 | 3.299378  | 11.22662 | 0.248395 | 3.240679 |
| C | -7.95275 | 4.767652 | -0.88191 | -7.93284 | 4.756889  | -0.943348 | 7.891226 | -4.66174 | -1.32772 |
| C | -7.01147 | 4.31463  | 0.060217 | -6.99833 | 4.3102    | 0.008807  | 6.929991 | -4.28027 | -0.37521 |
| C | -6.91833 | 2.945798 | 0.324203 | -6.91517 | 2.944604  | 0.291919  | 6.856932 | -2.94114 | 0.01701  |
| C | -8.63481 | 2.47004  | -1.22402 | -8.62906 | 2.459211  | -1.256217 | 8.633848 | -2.36177 | -1.42955 |
| C | -8.77065 | 3.831761 | -1.52876 | -8.75422 | 3.81764   | -1.580604 | 8.74832  | -3.68899 | -1.86167 |
| C | -9.43225 | 1.395813 | -1.83677 | -9.43116 | 1.381813  | -1.85657  | 9.460891 | -1.24877 | -1.9242  |
| C | -9.77615 | -0.93788 | -1.91376 | -9.78803 | -0.950827 | -1.902782 | 9.840805 | 1.07921  | -1.77261 |
| C | -10.8025 | -0.79058 | -2.85029 | -10.8124 | -0.810476 | -2.842399 | 10.88829 | 1.002055 | -2.69418 |
| C | -10.4546 | 1.602176 | -2.77366 | -10.4517 | 1.581185  | -2.797268 | 10.50513 | -1.38447 | -2.84758 |
| C | -11.1492 | 0.499992 | -3.28953 | -11.1516 | 0.476181  | -3.299353 | 11.22662 | -0.2484  | -3.24068 |
| C | 0        | 0        | 0.719647 | -5.7E-05 | 0.010172  | 0.728773  | 0        | 0        | 0.733534 |
| C | 0        | 0        | -0.71965 | -5.8E-05 | -0.010407 | -0.728769 | 0        | 0        | -0.73353 |
| C | -2.31601 | 0.00638  | -0.72816 | -2.3267  | -0.004208 | -0.714214 | 2.331569 | 0.015956 | -0.7132  |
| C | -2.31601 | -0.00638 | 0.728163 | -2.3267  | 0.004005  | 0.714219  | 2.331569 | -0.01596 | 0.713195 |
| C | -3.58648 | 0.014914 | -1.45723 | -3.58865 | -0.006474 | -1.445133 | 3.592686 | 0.04897  | -1.43824 |
| C | -4.7814  | 0.004906 | -0.72246 | -4.79234 | -0.004972 | -0.719051 | 4.799937 | 0.033866 | -0.71634 |
| C | -4.7814  | -0.00491 | 0.722457 | -4.79233 | 0.004842  | 0.719059  | 4.799937 | -0.03387 | 0.71634  |
| C | -3.58648 | -0.01491 | 1.457234 | -3.58865 | 0.0063    | 1.44514   | 3.592686 | -0.04897 | 1.438244 |

|   |          |          |          |          |           |           |          |          |          |
|---|----------|----------|----------|----------|-----------|-----------|----------|----------|----------|
| C | -3.66344 | 0.029128 | -2.86431 | -3.66687 | -0.013283 | -2.85664  | 3.674506 | 0.101276 | -2.8511  |
| C | -4.92699 | 0.03267  | -3.46636 | -4.92527 | -0.017422 | -3.462964 | 4.929431 | 0.133141 | -3.46085 |
| C | -6.08482 | 0.016287 | -2.66923 | -6.09101 | -0.020158 | -2.67038  | 6.098565 | 0.11764  | -2.67122 |
| C | -3.66344 | -0.02913 | 2.864311 | -3.66687 | 0.013103  | 2.856647  | 3.674506 | -0.10128 | 2.851101 |
| C | -4.92699 | -0.03267 | 3.466363 | -4.92527 | 0.017278  | 3.462972  | 4.929431 | -0.13314 | 3.460849 |
| C | -6.08482 | -0.01629 | 2.669234 | -6.091   | 0.020061  | 2.670389  | 6.098565 | -0.11764 | 2.67122  |
| H | 2.751718 | 0.036643 | 3.451358 | 2.765154 | 0.09586   | 3.427144  | -2.75822 | 0.11531  | 3.4312   |
| H | 5.031873 | 0.044763 | 4.544588 | 5.028444 | 0.136762  | 4.546134  | -5.02694 | 0.172048 | 4.539208 |
| H | 7.074646 | 0.006821 | 3.111377 | 7.089419 | 0.081358  | 3.133986  | -7.08451 | 0.151108 | 3.121281 |
| H | 7.074646 | -0.00682 | -3.11138 | 7.089417 | -0.081474 | -3.13399  | -7.08451 | -0.15111 | -3.12128 |
| H | 5.031873 | -0.04476 | -4.54459 | 5.028441 | -0.136969 | -4.546135 | -5.02694 | -0.17205 | -4.53921 |
| H | 2.751718 | -0.03664 | -3.45136 | 2.765151 | -0.096113 | -3.427143 | -2.75822 | -0.11531 | -3.4312  |
| H | 6.359939 | 5.004663 | -0.58355 | 6.16658  | 4.963596  | -0.364228 | -6.247   | -5.00128 | -0.05782 |
| H | 6.212213 | 2.557545 | -1.04905 | 6.072014 | 2.524237  | -0.891715 | -6.13493 | -2.60596 | -0.75232 |
| H | 9.500499 | 4.158613 | 2.260365 | 9.457695 | 4.14625   | 2.314398  | -9.48822 | -3.9629  | 2.604409 |
| H | 9.475817 | -1.9149  | 1.553197 | 9.587775 | -1.911601 | 1.428494  | -9.5452  | 2.023338 | 1.329778 |
| H | 11.31507 | -1.66996 | 3.222492 | 11.46872 | -1.6615   | 3.052283  | -11.4233 | 1.902647 | 2.971016 |
| H | 10.70792 | 2.605951 | 3.094945 | 10.74274 | 2.598445  | 3.071101  | -10.7567 | -2.35742 | 3.252916 |
| H | 6.359939 | -5.00466 | 0.583548 | 6.166939 | -4.963721 | 0.364163  | -6.247   | 5.001279 | 0.057823 |
| H | 6.212213 | -2.55755 | 1.049049 | 6.072189 | -2.524373 | 0.891668  | -6.13493 | 2.605956 | 0.752318 |
| H | 9.500499 | -4.15861 | -2.26037 | 9.458019 | -4.146113 | -2.314426 | -9.48822 | 3.9629   | -2.60441 |
| H | 9.475817 | 1.914895 | -1.5532  | 9.587628 | 1.911743  | -1.428499 | -9.5452  | -2.02334 | -1.32978 |
| H | 11.31507 | 1.669957 | -3.22249 | 11.46861 | 1.66179   | -3.052268 | -11.4233 | -1.90265 | -2.97102 |
| H | 10.70792 | -2.60595 | -3.09495 | 10.74297 | -2.598214 | -3.071085 | -10.7567 | 2.357424 | -3.25292 |
| H | -6.35994 | -5.00466 | -0.58355 | -6.34423 | -5.003055 | -0.524955 | 6.247003 | 5.001279 | -0.05782 |
| H | -6.21221 | -2.55755 | -1.04905 | -6.21403 | -2.560794 | -1.023795 | 6.134929 | 2.605956 | -0.75232 |
| H | -9.5005  | -4.15861 | 2.260365 | -9.47848 | -4.138892 | 2.320513  | 9.488222 | 3.9629   | 2.604409 |
| H | -9.47582 | 1.914895 | 1.553197 | -9.49298 | 1.924366  | 1.527976  | 9.545199 | -2.02334 | 1.329778 |
| H | -11.3151 | 1.669957 | 3.222492 | -11.3294 | 1.692131  | 3.203536  | 11.42327 | -1.90265 | 2.971016 |
| H | -10.7079 | -2.60595 | 3.094945 | -10.6999 | -2.5819   | 3.131519  | 10.75667 | 2.357424 | 3.252916 |
| H | -6.35994 | 5.004663 | 0.583548 | -6.34389 | 5.002975  | 0.524954  | 6.247003 | -5.00128 | 0.057823 |
| H | -6.21221 | 2.557545 | 1.049049 | -6.21386 | 2.560706  | 1.023803  | 6.134929 | -2.60596 | 0.752318 |
| H | -9.5005  | 4.158613 | -2.26037 | -9.4782  | 4.13902   | -2.320513 | 9.488222 | -3.9629  | -2.60441 |
| H | -9.47582 | -1.9149  | -1.5532  | -9.49311 | -1.924236 | -1.527958 | 9.545199 | 2.023338 | -1.32978 |
| H | -11.3151 | -1.66996 | -3.22249 | -11.3295 | -1.691881 | -3.203509 | 11.42327 | 1.902647 | -2.97102 |
| H | -10.7079 | 2.605951 | -3.09495 | -10.6997 | 2.582109  | -3.131496 | 10.75667 | -2.35742 | -3.25292 |
| H | -2.75172 | 0.036643 | -3.45136 | -2.75211 | -0.015519 | -3.439062 | 2.758224 | 0.11531  | -3.4312  |
| H | -5.03187 | 0.044763 | -4.54459 | -5.02587 | -0.021546 | -4.541964 | 5.02694  | 0.172048 | -4.53921 |
| H | -7.07465 | 0.006821 | -3.11138 | -7.07844 | -0.034384 | -3.118248 | 7.084508 | 0.151108 | -3.12128 |
| H | -2.75172 | -0.03664 | 3.451358 | -2.75211 | 0.015307  | 3.439067  | 2.758224 | -0.11531 | 3.4312   |
| H | -5.03187 | -0.04476 | 4.544588 | -5.02587 | 0.021398  | 4.541972  | 5.02694  | -0.17205 | 4.539208 |
| H | -7.07465 | -0.00682 | 3.111377 | -7.07843 | 0.034321  | 3.118259  | 7.084508 | -0.15111 | 3.121281 |

|   |          |          |          |          |           |           |          |          |          |
|---|----------|----------|----------|----------|-----------|-----------|----------|----------|----------|
| H | -8.04623 | -5.82453 | 1.10639  | -8.01833 | -5.811169 | 1.182857  | 7.968712 | 5.694016 | 1.65069  |
| H | 8.046225 | 5.824525 | 1.10639  | 7.903774 | 5.787651  | 1.265258  | -7.96871 | -5.69402 | 1.65069  |
| H | -8.04623 | 5.824525 | -1.10639 | -8.01793 | 5.811198  | -1.182862 | 7.968712 | -5.69402 | -1.65069 |
| H | 8.046225 | -5.82453 | -1.10639 | 7.904208 | -5.787637 | -1.265312 | -7.96871 | 5.694016 | -1.65069 |
| H | -11.9422 | -0.64298 | 4.015295 | -11.9433 | -0.613486 | 4.027827  | 12.03694 | 0.337136 | 3.955837 |
| H | 11.94222 | 0.64298  | 4.015295 | 12.05049 | 0.642547  | 3.892549  | -12.0369 | -0.33714 | 3.955837 |
| H | -11.9422 | 0.64298  | -4.0153  | -11.9432 | 0.613777  | -4.027796 | 12.03694 | -0.33714 | -3.95584 |
| H | 11.94222 | -0.64298 | -4.0153  | 12.05058 | -0.642212 | -3.892521 | -12.0369 | 0.337136 | -3.95584 |

---

| <b>Os2</b> | <b>S0</b> |          |          | <b>S1</b> |          |          | <b>T1</b> |          |          |
|------------|-----------|----------|----------|-----------|----------|----------|-----------|----------|----------|
| Symbol     | X         | Y        | Z        | X         | Y        | Z        | X         | Y        | Z        |
| Os         | -7.6083   | 0        | 0        | -7.61943  | 0        | 0        | -7.6239   | 0        | 0        |
| Os         | 7.608301  | 0        | 0        | 7.619431  | 0        | 0        | 7.623896  | 0        | 0        |
| N          | 7.72278   | 2.036564 | 0.294512 | 7.702023  | 2.004675 | 0.464588 | 7.707032  | 2.002644 | 0.479192 |
| N          | 9.096985  | 0.142826 | 1.414429 | 9.132937  | 0.045751 | 1.396479 | 9.135298  | 0.035528 | 1.397486 |
| N          | 7.72278   | -2.03656 | -0.29451 | 7.702023  | -2.00468 | -0.46459 | 7.707032  | -2.00264 | -0.47919 |
| N          | 9.096985  | -0.14283 | -1.41443 | 9.132937  | -0.04575 | -1.39648 | 9.135298  | -0.03553 | -1.39749 |
| N          | 1.172854  | 0.008201 | 1.41709  | 1.171179  | -0.01438 | 1.42235  | 1.170272  | -0.01571 | 1.425452 |
| N          | 1.172854  | -0.0082  | -1.41709 | 1.171179  | 0.014378 | -1.42235 | 1.170272  | 0.015712 | -1.42545 |
| N          | 6.01972   | 0.004439 | 1.31288  | 6.036064  | -0.06656 | 1.324781 | 6.03434   | -0.06822 | 1.323153 |
| N          | 6.01972   | -0.00444 | -1.31288 | 6.036064  | 0.06656  | -1.32478 | 6.03434   | 0.068217 | -1.32315 |
| N          | -1.17285  | -0.0082  | 1.41709  | -1.17118  | 0.014378 | 1.42235  | -1.17027  | 0.015712 | 1.425452 |
| N          | -1.17285  | 0.008201 | -1.41709 | -1.17118  | -0.01438 | -1.42235 | -1.17027  | -0.01571 | -1.42545 |
| N          | -6.01972  | 0.004439 | -1.31288 | -6.03606  | -0.06656 | -1.32478 | -6.03434  | -0.06822 | -1.32315 |
| N          | -6.01972  | -0.00444 | 1.31288  | -6.03606  | 0.06656  | 1.324781 | -6.03434  | 0.068217 | 1.323153 |
| N          | -7.72278  | 2.036564 | -0.29451 | -7.70202  | 2.004675 | -0.46459 | -7.70703  | 2.002644 | -0.47919 |
| N          | -9.09699  | 0.142826 | -1.41443 | -9.13294  | 0.045751 | -1.39648 | -9.1353   | 0.035528 | -1.39749 |
| N          | -7.72278  | -2.03656 | 0.294512 | -7.70202  | -2.00468 | 0.464588 | -7.70703  | -2.00264 | 0.479192 |
| N          | -9.09699  | -0.14283 | 1.414429 | -9.13294  | -0.04575 | 1.396479 | -9.1353   | -0.03553 | 1.397486 |
| C          | 7.979776  | 4.799328 | 0.864606 | 7.926518  | 4.709751 | 1.254834 | 7.928482  | 4.700618 | 1.292956 |
| C          | 7.03594   | 4.316531 | -0.07261 | 6.951822  | 4.286157 | 0.32119  | 6.958422  | 4.285228 | 0.350761 |
| C          | 6.932272  | 2.952666 | -0.33071 | 6.862237  | 2.946475 | -0.04553 | 6.870444  | 2.948851 | -0.02789 |
| C          | 8.644198  | 2.47764  | 1.207642 | 8.647063  | 2.384724 | 1.381718 | 8.647648  | 2.374365 | 1.404034 |
| C          | 8.785973  | 3.841657 | 1.501428 | 8.77426   | 3.720416 | 1.783107 | 8.773266  | 3.706674 | 1.81723  |
| C          | 9.43967   | 1.403728 | 1.827408 | 9.471719  | 1.275872 | 1.895171 | 9.471312  | 1.261367 | 1.909481 |
| C          | 9.777848  | -0.91989 | 1.926239 | 9.840204  | -1.04592 | 1.795608 | 9.843518  | -1.05955 | 1.786904 |
| C          | 10.80107  | -0.76229 | 2.85694  | 10.88706  | -0.94881 | 2.708012 | 10.88784  | -0.97022 | 2.702596 |
| C          | 10.46418  | 1.613078 | 2.761868 | 10.52048  | 1.424381 | 2.811802 | 10.51765  | 1.401567 | 2.829871 |
| C          | 11.17332  | 0.528044 | 3.302618 | 11.25576  | 0.307115 | 3.244237 | 11.25345  | 0.28079  | 3.252637 |
| C          | 8.081192  | 6.297994 | 1.143934 | 8.015705  | 6.182456 | 1.649071 | 8.016399  | 6.170103 | 1.699289 |
| C          | 12.29831  | 0.688972 | 4.323807 | 12.40812  | 0.401717 | 4.242165 | 12.40306  | 0.366727 | 4.254329 |
| C          | 7.979776  | -4.79933 | -0.86461 | 7.926518  | -4.70975 | -1.25483 | 7.928482  | -4.70062 | -1.29296 |
| C          | 7.03594   | -4.31653 | 0.07261  | 6.951822  | -4.28616 | -0.32119 | 6.958422  | -4.28523 | -0.35076 |
| C          | 6.932272  | -2.95267 | 0.330708 | 6.862237  | -2.94648 | 0.045526 | 6.870444  | -2.94885 | 0.027894 |
| C          | 8.644198  | -2.47764 | -1.20764 | 8.647063  | -2.38472 | -1.38172 | 8.647648  | -2.37437 | -1.40403 |
| C          | 8.785973  | -3.84166 | -1.50143 | 8.77426   | -3.72042 | -1.78311 | 8.773266  | -3.70667 | -1.81723 |
| C          | 9.43967   | -1.40373 | -1.82741 | 9.471719  | -1.27587 | -1.89517 | 9.471312  | -1.26137 | -1.90948 |
| C          | 9.777848  | 0.919892 | -1.92624 | 9.840204  | 1.045919 | -1.79561 | 9.843518  | 1.059552 | -1.7869  |
| C          | 10.80107  | 0.762292 | -2.85694 | 10.88706  | 0.948809 | -2.70801 | 10.88784  | 0.970218 | -2.7026  |
| C          | 10.46418  | -1.61308 | -2.76187 | 10.52048  | -1.42438 | -2.8118  | 10.51765  | -1.40157 | -2.82987 |
| C          | 11.17332  | -0.52804 | -3.30262 | 11.25576  | -0.30712 | -3.24424 | 11.25345  | -0.28079 | -3.25264 |

|   |          |          |          |          |          |          |          |          |          |
|---|----------|----------|----------|----------|----------|----------|----------|----------|----------|
| C | 8.081192 | -6.29799 | -1.14393 | 8.015705 | -6.18246 | -1.64907 | 8.016399 | -6.1701  | -1.69929 |
| C | 12.29831 | -0.68897 | -4.32381 | 12.40812 | -0.40172 | -4.24217 | 12.40306 | -0.36673 | -4.25433 |
| C | 2.316315 | -0.00803 | -0.72831 | 2.329597 | 0.013081 | -0.71809 | 2.331973 | 0.013706 | -0.71323 |
| C | 2.316315 | 0.008031 | 0.728306 | 2.329597 | -0.01308 | 0.718089 | 2.331973 | -0.01371 | 0.713231 |
| C | 3.586687 | 0.019963 | 1.457589 | 3.592395 | -0.0411  | 1.44049  | 3.593125 | -0.0423  | 1.438789 |
| C | 4.781371 | 0.008012 | 0.722123 | 4.800956 | -0.02903 | 0.71396  | 4.800251 | -0.02961 | 0.716561 |
| C | 4.781371 | -0.00801 | -0.72212 | 4.800956 | 0.029026 | -0.71396 | 4.800251 | 0.029605 | -0.71656 |
| C | 3.586687 | -0.01996 | -1.45759 | 3.592395 | 0.041103 | -1.44049 | 3.593125 | 0.042303 | -1.43879 |
| C | 3.66422  | 0.040359 | 2.864387 | 3.67508  | -0.0841  | 2.851209 | 3.675318 | -0.08713 | 2.851842 |
| C | 4.928676 | 0.048498 | 3.465369 | 4.930792 | -0.1089  | 3.463195 | 4.930733 | -0.11339 | 3.461162 |
| C | 6.086053 | 0.030153 | 2.667992 | 6.098697 | -0.09597 | 2.671971 | 6.099587 | -0.10016 | 2.671071 |
| C | 6.086053 | -0.03015 | -2.66799 | 6.098697 | 0.095974 | -2.67197 | 6.099587 | 0.10016  | -2.67107 |
| C | 4.928676 | -0.0485  | -3.46537 | 4.930792 | 0.108896 | -3.4632  | 4.930733 | 0.11339  | -3.46116 |
| C | 3.66422  | -0.04036 | -2.86439 | 3.67508  | 0.084095 | -2.85121 | 3.675318 | 0.087129 | -2.85184 |
| C | 0        | 0        | 0.719591 | 0        | 0        | 0.72979  | 0        | 0        | 0.733551 |
| C | 0        | 0        | -0.71959 | 0        | 0        | -0.72979 | 0        | 0        | -0.73355 |
| C | -2.31632 | 0.008031 | -0.72831 | -2.3296  | -0.01308 | -0.71809 | -2.33197 | -0.01371 | -0.71323 |
| C | -2.31632 | -0.00803 | 0.728306 | -2.3296  | 0.013081 | 0.718089 | -2.33197 | 0.013706 | 0.713231 |
| C | -3.58669 | 0.019963 | -1.45759 | -3.5924  | -0.0411  | -1.44049 | -3.59313 | -0.0423  | -1.43879 |
| C | -4.78137 | 0.008012 | -0.72212 | -4.80096 | -0.02903 | -0.71396 | -4.80025 | -0.02961 | -0.71656 |
| C | -4.78137 | -0.00801 | 0.722123 | -4.80096 | 0.029026 | 0.71396  | -4.80025 | 0.029605 | 0.716561 |
| C | -3.58669 | -0.01996 | 1.457589 | -3.5924  | 0.041103 | 1.44049  | -3.59313 | 0.042303 | 1.438789 |
| C | -3.66422 | 0.040359 | -2.86439 | -3.67508 | -0.0841  | -2.85121 | -3.67532 | -0.08713 | -2.85184 |
| C | -4.92868 | 0.048498 | -3.46537 | -4.93079 | -0.1089  | -3.4632  | -4.93073 | -0.11339 | -3.46116 |
| C | -6.08605 | 0.030153 | -2.66799 | -6.0987  | -0.09597 | -2.67197 | -6.09959 | -0.10016 | -2.67107 |
| C | -3.66422 | -0.04036 | 2.864387 | -3.67508 | 0.084095 | 2.851209 | -3.67532 | 0.087129 | 2.851842 |
| C | -4.92868 | -0.0485  | 3.465369 | -4.93079 | 0.108896 | 3.463195 | -4.93073 | 0.11339  | 3.461162 |
| C | -6.08605 | -0.03015 | 2.667992 | -6.0987  | 0.095974 | 2.671971 | -6.09959 | 0.10016  | 2.671071 |
| C | -7.97978 | 4.799328 | -0.86461 | -7.92652 | 4.709751 | -1.25483 | -7.92848 | 4.700618 | -1.29296 |
| C | -7.03594 | 4.316531 | 0.07261  | -6.95182 | 4.286157 | -0.32119 | -6.95842 | 4.285228 | -0.35076 |
| C | -6.93227 | 2.952666 | 0.330708 | -6.86224 | 2.946475 | 0.045526 | -6.87044 | 2.948851 | 0.027894 |
| C | -8.6442  | 2.47764  | -1.20764 | -8.64706 | 2.384724 | -1.38172 | -8.64765 | 2.374365 | -1.40403 |
| C | -8.78597 | 3.841657 | -1.50143 | -8.77426 | 3.720416 | -1.78311 | -8.77327 | 3.706674 | -1.81723 |
| C | -9.43967 | 1.403728 | -1.82741 | -9.47172 | 1.275872 | -1.89517 | -9.47131 | 1.261367 | -1.90948 |
| C | -9.77785 | -0.91989 | -1.92624 | -9.8402  | -1.04592 | -1.79561 | -9.84352 | -1.05955 | -1.7869  |
| C | -10.8011 | -0.76229 | -2.85694 | -10.8871 | -0.94881 | -2.70801 | -10.8878 | -0.97022 | -2.7026  |
| C | -10.4642 | 1.613078 | -2.76187 | -10.5205 | 1.424381 | -2.8118  | -10.5177 | 1.401567 | -2.82987 |
| C | -11.1733 | 0.528044 | -3.30262 | -11.2558 | 0.307115 | -3.24424 | -11.2535 | 0.28079  | -3.25264 |
| C | -8.08119 | 6.297994 | -1.14393 | -8.01571 | 6.182456 | -1.64907 | -8.0164  | 6.170103 | -1.69929 |
| C | -12.2983 | 0.688972 | -4.32381 | -12.4081 | 0.401717 | -4.24217 | -12.4031 | 0.366727 | -4.25433 |
| C | -7.97978 | -4.79933 | 0.864606 | -7.92652 | -4.70975 | 1.254834 | -7.92848 | -4.70062 | 1.292956 |
| C | -7.03594 | -4.31653 | -0.07261 | -6.95182 | -4.28616 | 0.32119  | -6.95842 | -4.28523 | 0.350761 |

|   |          |          |          |          |          |          |          |          |          |
|---|----------|----------|----------|----------|----------|----------|----------|----------|----------|
| C | -6.93227 | -2.95267 | -0.33071 | -6.86224 | -2.94648 | -0.04553 | -6.87044 | -2.94885 | -0.02789 |
| C | -8.6442  | -2.47764 | 1.207642 | -8.64706 | -2.38472 | 1.381718 | -8.64765 | -2.37437 | 1.404034 |
| C | -8.78597 | -3.84166 | 1.501428 | -8.77426 | -3.72042 | 1.783107 | -8.77327 | -3.70667 | 1.81723  |
| C | -9.43967 | -1.40373 | 1.827408 | -9.47172 | -1.27587 | 1.895171 | -9.47131 | -1.26137 | 1.909481 |
| C | -9.77785 | 0.919892 | 1.926239 | -9.8402  | 1.045919 | 1.795608 | -9.84352 | 1.059552 | 1.786904 |
| C | -10.8011 | 0.762292 | 2.85694  | -10.8871 | 0.948809 | 2.708012 | -10.8878 | 0.970218 | 2.702596 |
| C | -10.4642 | -1.61308 | 2.761868 | -10.5205 | -1.42438 | 2.811802 | -10.5177 | -1.40157 | 2.829871 |
| C | -11.1733 | -0.52804 | 3.302618 | -11.2558 | -0.30712 | 3.244237 | -11.2535 | -0.28079 | 3.252637 |
| C | -8.08119 | -6.29799 | 1.143934 | -8.01571 | -6.18246 | 1.649071 | -8.0164  | -6.1701  | 1.699289 |
| C | -12.2983 | -0.68897 | 4.323807 | -12.4081 | -0.40172 | 4.242165 | -12.4031 | -0.36673 | 4.254329 |
| C | 8.414425 | 7.034498 | -0.17416 | 8.284059 | 7.024544 | 0.379817 | 8.291248 | 7.022071 | 0.438024 |
| C | 6.719171 | 6.799766 | 1.677659 | 6.667971 | 6.613953 | 2.27307  | 6.665867 | 6.597334 | 2.320164 |
| C | 9.168025 | 6.624618 | 2.180504 | 9.138691 | 6.447195 | 2.664418 | 9.134716 | 6.426202 | 2.721952 |
| C | 12.56154 | 2.162512 | 4.672937 | 12.65768 | 1.844346 | 4.709644 | 12.65055 | 1.805028 | 4.736018 |
| C | 11.91248 | -0.06643 | 5.616793 | 12.07384 | -0.4698  | 5.475311 | 12.06581 | -0.51664 | 5.478267 |
| C | 13.59459 | 0.077595 | 3.74337  | 13.6948  | -0.13371 | 3.571584 | 13.69188 | -0.16163 | 3.582178 |
| C | 12.56154 | -2.16251 | -4.67294 | 12.65768 | -1.84435 | -4.70964 | 12.65055 | -1.80503 | -4.73602 |
| C | 11.91248 | 0.066431 | -5.61679 | 12.07384 | 0.469801 | -5.47531 | 12.06581 | 0.516644 | -5.47827 |
| C | 13.59459 | -0.0776  | -3.74337 | 13.6948  | 0.133711 | -3.57158 | 13.69188 | 0.161626 | -3.58218 |
| C | 8.414425 | -7.0345  | 0.174157 | 8.284059 | -7.02454 | -0.37982 | 8.291248 | -7.02207 | -0.43802 |
| C | 6.719171 | -6.79977 | -1.67766 | 6.667971 | -6.61395 | -2.27307 | 6.665867 | -6.59733 | -2.32016 |
| C | 9.168025 | -6.62462 | -2.1805  | 9.138691 | -6.4472  | -2.66442 | 9.134716 | -6.4262  | -2.72195 |
| C | -6.71917 | 6.799766 | -1.67766 | -6.66797 | 6.613953 | -2.27307 | -6.66587 | 6.597334 | -2.32016 |
| C | -8.41443 | 7.034498 | 0.174157 | -8.28406 | 7.024544 | -0.37982 | -8.29125 | 7.022071 | -0.43802 |
| C | -9.16803 | 6.624618 | -2.1805  | -9.13869 | 6.447195 | -2.66442 | -9.13472 | 6.426202 | -2.72195 |
| C | -11.9125 | 0.066431 | 5.616793 | -12.0738 | 0.469801 | 5.475311 | -12.0658 | 0.516644 | 5.478267 |
| C | -13.5946 | -0.0776  | 3.74337  | -13.6948 | 0.133711 | 3.571584 | -13.6919 | 0.161626 | 3.582178 |
| C | -12.5615 | -2.16251 | 4.672937 | -12.6577 | -1.84435 | 4.709644 | -12.6505 | -1.80503 | 4.736018 |
| C | -6.71917 | -6.79977 | 1.677659 | -6.66797 | -6.61395 | 2.27307  | -6.66587 | -6.59733 | 2.320164 |
| C | -9.16803 | -6.62462 | 2.180504 | -9.13869 | -6.4472  | 2.664418 | -9.13472 | -6.4262  | 2.721952 |
| C | -8.41443 | -7.0345  | -0.17416 | -8.28406 | -7.02454 | 0.379817 | -8.29125 | -7.02207 | 0.438024 |
| C | -12.5615 | 2.162512 | -4.67294 | -12.6577 | 1.844346 | -4.70964 | -12.6505 | 1.805028 | -4.73602 |
| C | -13.5946 | 0.077595 | -3.74337 | -13.6948 | -0.13371 | -3.57158 | -13.6919 | -0.16163 | -3.58218 |
| C | -11.9125 | -0.06643 | -5.61679 | -12.0738 | -0.4698  | -5.47531 | -12.0658 | -0.51664 | -5.47827 |
| H | 6.378242 | 4.995655 | -0.60581 | 6.258698 | 4.992158 | -0.12449 | 6.267807 | 4.99517  | -0.09249 |
| H | 6.219399 | 2.567998 | -1.05104 | 6.125543 | 2.605988 | -0.76374 | 6.137751 | 2.614972 | -0.75336 |
| H | 9.525846 | 4.151345 | 2.230129 | 9.531949 | 3.985979 | 2.510508 | 9.527785 | 3.965952 | 2.550194 |
| H | 9.478536 | -1.90148 | 1.577033 | 9.542514 | -2.00036 | 1.376814 | 9.548435 | -2.01011 | 1.357583 |
| H | 11.30387 | -1.64981 | 3.228177 | 11.41045 | -1.85557 | 2.993457 | 11.41195 | -1.87909 | 2.97978  |
| H | 10.70647 | 2.625654 | 3.062355 | 10.76336 | 2.412339 | 3.184166 | 10.75853 | 2.385959 | 3.212812 |
| H | 6.378242 | -4.99566 | 0.605812 | 6.258698 | -4.99216 | 0.124485 | 6.267807 | -4.99517 | 0.092491 |
| H | 6.219399 | -2.568   | 1.051041 | 6.125543 | -2.60599 | 0.763743 | 6.137751 | -2.61497 | 0.75336  |

|   |          |          |          |          |          |          |          |          |          |
|---|----------|----------|----------|----------|----------|----------|----------|----------|----------|
| H | 9.525846 | -4.15135 | -2.23013 | 9.531949 | -3.98598 | -2.51051 | 9.527785 | -3.96595 | -2.55019 |
| H | 9.478536 | 1.901484 | -1.57703 | 9.542514 | 2.000362 | -1.37681 | 9.548435 | 2.010111 | -1.35758 |
| H | 11.30387 | 1.649808 | -3.22818 | 11.41045 | 1.855568 | -2.99346 | 11.41195 | 1.879093 | -2.97978 |
| H | 10.70647 | -2.62565 | -3.06236 | 10.76336 | -2.41234 | -3.18417 | 10.75853 | -2.38596 | -3.21281 |
| H | 2.753015 | 0.049477 | 3.452196 | 2.759364 | -0.09629 | 3.432657 | 2.759376 | -0.09966 | 3.432494 |
| H | 5.03406  | 0.065984 | 4.543547 | 5.027857 | -0.14029 | 4.54175  | 5.028521 | -0.14603 | 4.53977  |
| H | 7.076597 | 0.025067 | 3.108791 | 7.085577 | -0.12256 | 3.121106 | 7.08632  | -0.12857 | 3.119924 |
| H | 7.076597 | -0.02507 | -3.10879 | 7.085577 | 0.122559 | -3.12111 | 7.08632  | 0.128568 | -3.11992 |
| H | 5.03406  | -0.06598 | -4.54355 | 5.027857 | 0.140287 | -4.54175 | 5.028521 | 0.146031 | -4.53977 |
| H | 2.753015 | -0.04948 | -3.4522  | 2.759364 | 0.096292 | -3.43266 | 2.759376 | 0.099664 | -3.43249 |
| H | -2.75302 | 0.049477 | -3.4522  | -2.75936 | -0.09629 | -3.43266 | -2.75938 | -0.09966 | -3.43249 |
| H | -5.03406 | 0.065984 | -4.54355 | -5.02786 | -0.14029 | -4.54175 | -5.02852 | -0.14603 | -4.53977 |
| H | -7.0766  | 0.025067 | -3.10879 | -7.08558 | -0.12256 | -3.12111 | -7.08632 | -0.12857 | -3.11992 |
| H | -2.75302 | -0.04948 | 3.452196 | -2.75936 | 0.096292 | 3.432657 | -2.75938 | 0.099664 | 3.432494 |
| H | -5.03406 | -0.06598 | 4.543547 | -5.02786 | 0.140287 | 4.54175  | -5.02852 | 0.146031 | 4.53977  |
| H | -7.0766  | -0.02507 | 3.108791 | -7.08558 | 0.122559 | 3.121106 | -7.08632 | 0.128568 | 3.119924 |
| H | -6.37824 | 4.995655 | 0.605812 | -6.2587  | 4.992158 | 0.124485 | -6.26781 | 4.99517  | 0.092491 |
| H | -6.2194  | 2.567998 | 1.051041 | -6.12554 | 2.605988 | 0.763743 | -6.13775 | 2.614972 | 0.75336  |
| H | -9.52585 | 4.151345 | -2.23013 | -9.53195 | 3.985979 | -2.51051 | -9.52779 | 3.965952 | -2.55019 |
| H | -9.47854 | -1.90148 | -1.57703 | -9.54251 | -2.00036 | -1.37681 | -9.54844 | -2.01011 | -1.35758 |
| H | -11.3039 | -1.64981 | -3.22818 | -11.4104 | -1.85557 | -2.99346 | -11.412  | -1.87909 | -2.97978 |
| H | -10.7065 | 2.625654 | -3.06236 | -10.7634 | 2.412339 | -3.18417 | -10.7585 | 2.385959 | -3.21281 |
| H | -6.37824 | -4.99566 | -0.60581 | -6.2587  | -4.99216 | -0.12449 | -6.26781 | -4.99517 | -0.09249 |
| H | -6.2194  | -2.568   | -1.05104 | -6.12554 | -2.60599 | -0.76374 | -6.13775 | -2.61497 | -0.75336 |
| H | -9.52585 | -4.15135 | 2.230129 | -9.53195 | -3.98598 | 2.510508 | -9.52779 | -3.96595 | 2.550194 |
| H | -9.47854 | 1.901484 | 1.577033 | -9.54251 | 2.000362 | 1.376814 | -9.54844 | 2.010111 | 1.357583 |
| H | -11.3039 | 1.649808 | 3.228177 | -11.4104 | 1.855568 | 2.993457 | -11.412  | 1.879093 | 2.97978  |
| H | -10.7065 | -2.62565 | 3.062355 | -10.7634 | -2.41234 | 3.184166 | -10.7585 | -2.38596 | 3.212812 |
| H | 7.642799 | 6.871581 | -0.93751 | 7.48506  | 6.907721 | -0.36349 | 7.495874 | 6.91154  | -0.31013 |
| H | 8.475243 | 8.113604 | 0.018829 | 8.33572  | 8.08593  | 0.655301 | 8.34193  | 8.081204 | 0.722204 |
| H | 9.378444 | 6.699806 | -0.57858 | 9.236284 | 6.740906 | -0.08657 | 9.245658 | 6.741769 | -0.0259  |
| H | 6.777822 | 7.880309 | 1.863234 | 6.718062 | 7.677172 | 2.541636 | 6.715231 | 7.658356 | 2.597391 |
| H | 5.91069  | 6.624312 | 0.956294 | 5.834038 | 6.481616 | 1.572011 | 5.835294 | 6.471096 | 1.614006 |
| H | 6.45796  | 6.299886 | 2.619405 | 6.452641 | 6.036544 | 3.181333 | 6.445784 | 6.012886 | 3.222759 |
| H | 8.96165  | 6.149573 | 3.149153 | 8.978603 | 5.896703 | 3.601323 | 8.969993 | 5.868495 | 3.65377  |
| H | 10.16354 | 6.31065  | 1.838504 | 10.12405 | 6.178482 | 2.260241 | 10.12179 | 6.160117 | 2.320221 |
| H | 9.195319 | 7.709895 | 2.339507 | 9.156285 | 7.517412 | 2.904936 | 9.15178  | 7.494489 | 2.970917 |
| H | 12.8653  | 2.741139 | 3.79004  | 12.92952 | 2.502117 | 3.873031 | 12.92427 | 2.470794 | 3.906369 |
| H | 11.67858 | 2.638698 | 5.120446 | 11.77996 | 2.264493 | 5.219133 | 11.77133 | 2.219932 | 5.247191 |
| H | 13.37715 | 2.215755 | 5.404939 | 13.49166 | 1.848356 | 5.422439 | 13.48265 | 1.802695 | 5.450996 |
| H | 11.74928 | -1.13552 | 5.42954  | 11.92543 | -1.52236 | 5.202241 | 11.91884 | -1.56668 | 5.194883 |
| H | 12.72526 | 0.028293 | 6.348844 | 12.90667 | -0.42056 | 6.188796 | 12.89667 | -0.47359 | 6.194422 |

|   |          |          |          |          |          |          |          |          |          |
|---|----------|----------|----------|----------|----------|----------|----------|----------|----------|
| H | 10.99823 | 0.351497 | 6.057785 | 11.16615 | -0.11022 | 5.97683  | 11.15654 | -0.16234 | 5.980679 |
| H | 14.40293 | 0.174709 | 4.47997  | 14.52402 | -0.083   | 4.289122 | 14.51901 | -0.11716 | 4.302519 |
| H | 13.47399 | -0.98881 | 3.513444 | 13.58498 | -1.17916 | 3.256184 | 13.58373 | -1.20409 | 3.256562 |
| H | 13.8975  | 0.597951 | 2.825538 | 13.95977 | 0.467856 | 2.692582 | 13.95892 | 0.448461 | 2.709708 |
| H | 12.8653  | -2.74114 | -3.79004 | 12.92952 | -2.50212 | -3.87303 | 12.92427 | -2.47079 | -3.90637 |
| H | 11.67858 | -2.6387  | -5.12045 | 11.77996 | -2.26449 | -5.21913 | 11.77133 | -2.21993 | -5.24719 |
| H | 13.37715 | -2.21576 | -5.40494 | 13.49166 | -1.84836 | -5.42244 | 13.48265 | -1.8027  | -5.451   |
| H | 11.74928 | 1.135516 | -5.42954 | 11.92543 | 1.522361 | -5.20224 | 11.91884 | 1.566675 | -5.19488 |
| H | 12.72526 | -0.02829 | -6.34884 | 12.90667 | 0.420562 | -6.1888  | 12.89667 | 0.473586 | -6.19442 |
| H | 10.99823 | -0.3515  | -6.05779 | 11.16615 | 0.110217 | -5.97683 | 11.15654 | 0.162337 | -5.98068 |
| H | 14.40293 | -0.17471 | -4.47997 | 14.52402 | 0.083001 | -4.28912 | 14.51901 | 0.117157 | -4.30252 |
| H | 13.47399 | 0.988809 | -3.51344 | 13.58498 | 1.179156 | -3.25618 | 13.58373 | 1.204091 | -3.25656 |
| H | 13.8975  | -0.59795 | -2.82554 | 13.95977 | -0.46786 | -2.69258 | 13.95892 | -0.44846 | -2.70971 |
| H | 7.642799 | -6.87158 | 0.937507 | 7.48506  | -6.90772 | 0.363487 | 7.495874 | -6.91154 | 0.310132 |
| H | 8.475243 | -8.1136  | -0.01883 | 8.33572  | -8.08593 | -0.6553  | 8.34193  | -8.0812  | -0.7222  |
| H | 9.378444 | -6.69981 | 0.578578 | 9.236284 | -6.74091 | 0.086567 | 9.245658 | -6.74177 | 0.025895 |
| H | 6.777822 | -7.88031 | -1.86323 | 6.718062 | -7.67717 | -2.54164 | 6.715231 | -7.65836 | -2.59739 |
| H | 5.91069  | -6.62431 | -0.95629 | 5.834038 | -6.48162 | -1.57201 | 5.835294 | -6.4711  | -1.61401 |
| H | 6.45796  | -6.29989 | -2.61941 | 6.452641 | -6.03654 | -3.18133 | 6.445784 | -6.01289 | -3.22276 |
| H | 8.96165  | -6.14957 | -3.14915 | 8.978603 | -5.8967  | -3.60132 | 8.969993 | -5.8685  | -3.65377 |
| H | 10.16354 | -6.31065 | -1.8385  | 10.12405 | -6.17848 | -2.26024 | 10.12179 | -6.16012 | -2.32022 |
| H | 9.195319 | -7.7099  | -2.33951 | 9.156285 | -7.51741 | -2.90494 | 9.15178  | -7.49449 | -2.97092 |
| H | -6.77782 | 7.880309 | -1.86323 | -6.71806 | 7.677172 | -2.54164 | -6.71523 | 7.658356 | -2.59739 |
| H | -5.91069 | 6.624312 | -0.95629 | -5.83404 | 6.481616 | -1.57201 | -5.83529 | 6.471096 | -1.61401 |
| H | -6.45796 | 6.299886 | -2.61941 | -6.45264 | 6.036544 | -3.18133 | -6.44578 | 6.012886 | -3.22276 |
| H | -7.6428  | 6.871581 | 0.937507 | -7.48506 | 6.907721 | 0.363487 | -7.49587 | 6.91154  | 0.310132 |
| H | -8.47524 | 8.113604 | -0.01883 | -8.33572 | 8.08593  | -0.6553  | -8.34193 | 8.081204 | -0.7222  |
| H | -9.37844 | 6.699806 | 0.578578 | -9.23628 | 6.740906 | 0.086567 | -9.24566 | 6.741769 | 0.025895 |
| H | -8.96165 | 6.149573 | -3.14915 | -8.9786  | 5.896703 | -3.60132 | -8.96999 | 5.868495 | -3.65377 |
| H | -10.1635 | 6.31065  | -1.8385  | -10.1241 | 6.178482 | -2.26024 | -10.1218 | 6.160117 | -2.32022 |
| H | -9.19532 | 7.709895 | -2.33951 | -9.15629 | 7.517412 | -2.90494 | -9.15178 | 7.494489 | -2.97092 |
| H | -11.7493 | 1.135516 | 5.42954  | -11.9254 | 1.522361 | 5.202241 | -11.9188 | 1.566675 | 5.194883 |
| H | -12.7253 | -0.02829 | 6.348844 | -12.9067 | 0.420562 | 6.188796 | -12.8967 | 0.473586 | 6.194422 |
| H | -10.9982 | -0.3515  | 6.057785 | -11.1662 | 0.110217 | 5.97683  | -11.1565 | 0.162337 | 5.980679 |
| H | -14.4029 | -0.17471 | 4.47997  | -14.524  | 0.083001 | 4.289122 | -14.519  | 0.117157 | 4.302519 |
| H | -13.474  | 0.988809 | 3.513444 | -13.585  | 1.179156 | 3.256184 | -13.5837 | 1.204091 | 3.256562 |
| H | -13.8975 | -0.59795 | 2.825538 | -13.9598 | -0.46786 | 2.692582 | -13.9589 | -0.44846 | 2.709708 |
| H | -12.8653 | -2.74114 | 3.79004  | -12.9295 | -2.50212 | 3.873031 | -12.9243 | -2.47079 | 3.906369 |
| H | -11.6786 | -2.6387  | 5.120446 | -11.78   | -2.26449 | 5.219133 | -11.7713 | -2.21993 | 5.247191 |
| H | -13.3772 | -2.21576 | 5.404939 | -13.4917 | -1.84836 | 5.422439 | -13.4827 | -1.8027  | 5.450996 |
| H | -6.77782 | -7.88031 | 1.863234 | -6.71806 | -7.67717 | 2.541636 | -6.71523 | -7.65836 | 2.597391 |
| H | -5.91069 | -6.62431 | 0.956294 | -5.83404 | -6.48162 | 1.572011 | -5.83529 | -6.4711  | 1.614006 |



|   |          |          |          |          |          |          |          |          |          |
|---|----------|----------|----------|----------|----------|----------|----------|----------|----------|
| H | -6.45796 | -6.29989 | 2.619405 | -6.45264 | -6.03654 | 3.181333 | -6.44578 | -6.01289 | 3.222759 |
| H | -8.96165 | -6.14957 | 3.149153 | -8.9786  | -5.8967  | 3.601323 | -8.96999 | -5.8685  | 3.65377  |
| H | -10.1635 | -6.31065 | 1.838504 | -10.1241 | -6.17848 | 2.260241 | -10.1218 | -6.16012 | 2.320221 |
| H | -9.19532 | -7.7099  | 2.339507 | -9.15629 | -7.51741 | 2.904936 | -9.15178 | -7.49449 | 2.970917 |
| H | -7.6428  | -6.87158 | -0.93751 | -7.48506 | -6.90772 | -0.36349 | -7.49587 | -6.91154 | -0.31013 |
| H | -8.47524 | -8.1136  | 0.018829 | -8.33572 | -8.08593 | 0.655301 | -8.34193 | -8.0812  | 0.722204 |
| H | -9.37844 | -6.69981 | -0.57858 | -9.23628 | -6.74091 | -0.08657 | -9.24566 | -6.74177 | -0.0259  |
| H | -12.8653 | 2.741139 | -3.79004 | -12.9295 | 2.502117 | -3.87303 | -12.9243 | 2.470794 | -3.90637 |
| H | -11.6786 | 2.638698 | -5.12045 | -11.78   | 2.264493 | -5.21913 | -11.7713 | 2.219932 | -5.24719 |
| H | -13.3772 | 2.215755 | -5.40494 | -13.4917 | 1.848356 | -5.42244 | -13.4827 | 1.802695 | -5.451   |
| H | -14.4029 | 0.174709 | -4.47997 | -14.524  | -0.083   | -4.28912 | -14.519  | -0.11716 | -4.30252 |
| H | -13.474  | -0.98881 | -3.51344 | -13.585  | -1.17916 | -3.25618 | -13.5837 | -1.20409 | -3.25656 |
| H | -13.8975 | 0.597951 | -2.82554 | -13.9598 | 0.467856 | -2.69258 | -13.9589 | 0.448461 | -2.70971 |
| H | -11.7493 | -1.13552 | -5.42954 | -11.9254 | -1.52236 | -5.20224 | -11.9188 | -1.56668 | -5.19488 |
| H | -12.7253 | 0.028293 | -6.34884 | -12.9067 | -0.42056 | -6.1888  | -12.8967 | -0.47359 | -6.19442 |
| H | -10.9982 | 0.351497 | -6.05779 | -11.1662 | -0.11022 | -5.97683 | -11.1565 | -0.16234 | -5.98068 |

| Os3    |          | S0       |          |          | S1       |          |          | T1       |          |  |
|--------|----------|----------|----------|----------|----------|----------|----------|----------|----------|--|
| Symbol | X        | Y        | Z        | X        | Y        | Z        | X        | Y        | Z        |  |
| Os     | 7.606776 | 0        | 0        | 7.614808 | 0        | 0        | 7.619539 | 0        | 0        |  |
| Os     | -7.60678 | 0        | 0        | -7.61481 | 0        | 0        | -7.61954 | 0        | 0        |  |
| N      | 7.715131 | 2.044906 | 0.278666 | 7.692936 | 2.025767 | 0.395295 | 7.698638 | 2.022947 | 0.417107 |  |
| N      | 9.100883 | 0.10254  | 1.424019 | 9.134569 | 0.04173  | 1.406596 | 9.136025 | 0.025409 | 1.407921 |  |
| N      | 7.715131 | -2.04491 | -0.27867 | 7.692936 | -2.02577 | -0.3953  | 7.698638 | -2.02295 | -0.41711 |  |
| N      | 9.100883 | -0.10254 | -1.42402 | 9.134569 | -0.04173 | -1.4066  | 9.136025 | -0.02541 | -1.40792 |  |
| N      | 1.17285  | -0.00231 | 1.417165 | 1.171178 | -0.01532 | 1.42226  | 1.170235 | -0.01814 | 1.425486 |  |
| N      | 1.17285  | 0.002312 | -1.41717 | 1.171178 | 0.015324 | -1.42226 | 1.170235 | 0.018135 | -1.42549 |  |
| N      | 6.018893 | -0.02821 | 1.31396  | 6.035937 | -0.06834 | 1.325049 | 6.034008 | -0.07386 | 1.323412 |  |
| N      | 6.018893 | 0.028206 | -1.31396 | 6.035937 | 0.068338 | -1.32505 | 6.034008 | 0.073862 | -1.32341 |  |
| N      | -1.17285 | 0.002312 | 1.417165 | -1.17118 | 0.015324 | 1.42226  | -1.17024 | 0.018135 | 1.425486 |  |
| N      | -1.17285 | -0.00231 | -1.41717 | -1.17118 | -0.01532 | -1.42226 | -1.17024 | -0.01814 | -1.42549 |  |
| N      | -6.01889 | -0.02821 | -1.31396 | -6.03594 | -0.06834 | -1.32505 | -6.03401 | -0.07386 | -1.32341 |  |
| N      | -6.01889 | 0.028206 | 1.31396  | -6.03594 | 0.068338 | 1.325049 | -6.03401 | 0.073862 | 1.323412 |  |
| N      | -7.71513 | 2.044906 | -0.27867 | -7.69294 | 2.025767 | -0.3953  | -7.69864 | 2.022947 | -0.41711 |  |
| N      | -9.10088 | 0.10254  | -1.42402 | -9.13457 | 0.04173  | -1.4066  | -9.13603 | 0.025409 | -1.40792 |  |
| N      | -7.71513 | -2.04491 | 0.278666 | -7.69294 | -2.02577 | 0.395295 | -7.69864 | -2.02295 | 0.417107 |  |
| N      | -9.10088 | -0.10254 | 1.424019 | -9.13457 | -0.04173 | 1.406596 | -9.13603 | -0.02541 | 1.407921 |  |
| C      | 8.097847 | 4.77057  | 0.909159 | 8.04217  | 4.711135 | 1.172742 | 8.046352 | 4.698063 | 1.228757 |  |
| C      | 7.137387 | 4.369161 | -0.01741 | 7.057328 | 4.345785 | 0.257223 | 7.065527 | 4.344738 | 0.304226 |  |
| C      | 6.967268 | 2.997448 | -0.31418 | 6.901302 | 2.9906   | -0.11311 | 6.910411 | 2.994419 | -0.08372 |  |
| C      | 8.660723 | 2.435013 | 1.203951 | 8.65825  | 2.376765 | 1.315718 | 8.660014 | 2.361642 | 1.346013 |  |
| C      | 8.893684 | 3.783373 | 1.549639 | 8.876475 | 3.706207 | 1.733098 | 8.877674 | 3.685844 | 1.780281 |  |
| C      | 9.416018 | 1.387444 | 1.813983 | 9.440056 | 1.309554 | 1.853131 | 9.439829 | 1.287681 | 1.872046 |  |
| C      | 9.792973 | -0.9199  | 1.965867 | 9.852617 | -0.99903 | 1.869572 | 9.853623 | -1.02162 | 1.859041 |  |
| C      | 10.81283 | -0.70441 | 2.921057 | 10.89283 | -0.81929 | 2.810512 | 10.89059 | -0.85374 | 2.805142 |  |
| C      | 10.41682 | 1.683325 | 2.764008 | 10.46033 | 1.569754 | 2.791886 | 10.45759 | 1.535575 | 2.816691 |  |
| C      | 11.12904 | 0.590714 | 3.32698  | 11.19967 | 0.457102 | 3.276706 | 11.19571 | 0.416724 | 3.288966 |  |
| C      | 8.097847 | -4.77057 | -0.90916 | 8.04217  | -4.71114 | -1.17274 | 8.046352 | -4.69806 | -1.22876 |  |
| C      | 7.137387 | -4.36916 | 0.017406 | 7.057328 | -4.34579 | -0.25722 | 7.065527 | -4.34474 | -0.30423 |  |
| C      | 6.967268 | -2.99745 | 0.314179 | 6.901302 | -2.9906  | 0.113109 | 6.910411 | -2.99442 | 0.083718 |  |
| C      | 8.660723 | -2.43501 | -1.20395 | 8.65825  | -2.37677 | -1.31572 | 8.660014 | -2.36164 | -1.34601 |  |
| C      | 8.893684 | -3.78337 | -1.54964 | 8.876475 | -3.70621 | -1.7331  | 8.877674 | -3.68584 | -1.78028 |  |
| C      | 9.416018 | -1.38744 | -1.81398 | 9.440056 | -1.30955 | -1.85313 | 9.439829 | -1.28768 | -1.87205 |  |
| C      | 9.792973 | 0.919897 | -1.96587 | 9.852617 | 0.99903  | -1.86957 | 9.853623 | 1.021623 | -1.85904 |  |
| C      | 10.81283 | 0.704408 | -2.92106 | 10.89283 | 0.819291 | -2.81051 | 10.89059 | 0.853741 | -2.80514 |  |
| C      | 10.41682 | -1.68333 | -2.76401 | 10.46033 | -1.56975 | -2.79189 | 10.45759 | -1.53558 | -2.81669 |  |
| C      | 11.12904 | -0.59071 | -3.32698 | 11.19967 | -0.4571  | -3.27671 | 11.19571 | -0.41672 | -3.28897 |  |
| C      | 2.316102 | 0.002248 | -0.72821 | 2.329268 | 0.013945 | -0.7182  | 2.331744 | 0.0158   | -0.71315 |  |
| C      | 2.316102 | -0.00225 | 0.728211 | 2.329268 | -0.01395 | 0.718203 | 2.331744 | -0.0158  | 0.713152 |  |

|   |          |          |          |          |          |          |          |          |          |
|---|----------|----------|----------|----------|----------|----------|----------|----------|----------|
| C | 3.586583 | -0.00956 | 1.457311 | 3.592179 | -0.0433  | 1.440363 | 3.592919 | -0.04789 | 1.43831  |
| C | 4.78143  | -0.00909 | 0.722419 | 4.800678 | -0.03049 | 0.713701 | 4.80004  | -0.03298 | 0.716343 |
| C | 4.78143  | 0.00909  | -0.72242 | 4.800678 | 0.030493 | -0.7137  | 4.80004  | 0.032982 | -0.71634 |
| C | 3.586583 | 0.009559 | -1.45731 | 3.592179 | 0.043304 | -1.44036 | 3.592919 | 0.04789  | -1.43831 |
| C | 3.663603 | -0.02091 | 2.864396 | 3.67478  | -0.08809 | 2.850846 | 3.674886 | -0.09819 | 2.851226 |
| C | 4.927258 | -0.03066 | 3.46619  | 4.930438 | -0.1142  | 3.463205 | 4.929938 | -0.128   | 3.460865 |
| C | 6.084989 | -0.03403 | 2.668842 | 6.098297 | -0.10031 | 2.672389 | 6.09898  | -0.11214 | 2.671218 |
| C | 6.084989 | 0.034026 | -2.66884 | 6.098297 | 0.100314 | -2.67239 | 6.09898  | 0.11214  | -2.67122 |
| C | 4.927258 | 0.030664 | -3.46619 | 4.930438 | 0.114203 | -3.46321 | 4.929938 | 0.128002 | -3.46087 |
| C | 3.663603 | 0.020913 | -2.8644  | 3.67478  | 0.088088 | -2.85085 | 3.674886 | 0.09819  | -2.85123 |
| C | 0        | 0        | 0.719629 | 0        | 0        | 0.729665 | 0        | 0        | 0.733592 |
| C | 0        | 0        | -0.71963 | 0        | 0        | -0.72967 | 0        | 0        | -0.73359 |
| C | -2.3161  | -0.00225 | -0.72821 | -2.32927 | -0.01395 | -0.7182  | -2.33174 | -0.0158  | -0.71315 |
| C | -2.3161  | 0.002248 | 0.728211 | -2.32927 | 0.013945 | 0.718203 | -2.33174 | 0.0158   | 0.713152 |
| C | -3.58658 | -0.00956 | -1.45731 | -3.59218 | -0.0433  | -1.44036 | -3.59292 | -0.04789 | -1.43831 |
| C | -4.78143 | -0.00909 | -0.72242 | -4.80068 | -0.03049 | -0.7137  | -4.80004 | -0.03298 | -0.71634 |
| C | -4.78143 | 0.00909  | 0.722419 | -4.80068 | 0.030493 | 0.713701 | -4.80004 | 0.032982 | 0.716343 |
| C | -3.58658 | 0.009559 | 1.457311 | -3.59218 | 0.043304 | 1.440363 | -3.59292 | 0.04789  | 1.43831  |
| C | -3.6636  | -0.02091 | -2.8644  | -3.67478 | -0.08809 | -2.85085 | -3.67489 | -0.09819 | -2.85123 |
| C | -4.92726 | -0.03066 | -3.46619 | -4.93044 | -0.1142  | -3.46321 | -4.92994 | -0.128   | -3.46087 |
| C | -6.08499 | -0.03403 | -2.66884 | -6.0983  | -0.10031 | -2.67239 | -6.09898 | -0.11214 | -2.67122 |
| C | -3.6636  | 0.020913 | 2.864396 | -3.67478 | 0.088088 | 2.850846 | -3.67489 | 0.09819  | 2.851226 |
| C | -4.92726 | 0.030664 | 3.46619  | -4.93044 | 0.114203 | 3.463205 | -4.92994 | 0.128002 | 3.460865 |
| C | -6.08499 | 0.034026 | 2.668842 | -6.0983  | 0.100314 | 2.672389 | -6.09898 | 0.11214  | 2.671218 |
| C | -8.09785 | 4.77057  | -0.90916 | -8.04217 | 4.711135 | -1.17274 | -8.04635 | 4.698063 | -1.22876 |
| C | -7.13739 | 4.369161 | 0.017406 | -7.05733 | 4.345785 | -0.25722 | -7.06553 | 4.344738 | -0.30423 |
| C | -6.96727 | 2.997448 | 0.314179 | -6.9013  | 2.9906   | 0.113109 | -6.91041 | 2.994419 | 0.083718 |
| C | -8.66072 | 2.435013 | -1.20395 | -8.65825 | 2.376765 | -1.31572 | -8.66001 | 2.361642 | -1.34601 |
| C | -8.89368 | 3.783373 | -1.54964 | -8.87648 | 3.706207 | -1.7331  | -8.87767 | 3.685844 | -1.78028 |
| C | -9.41602 | 1.387444 | -1.81398 | -9.44006 | 1.309554 | -1.85313 | -9.43983 | 1.287681 | -1.87205 |
| C | -9.79297 | -0.9199  | -1.96587 | -9.85262 | -0.99903 | -1.86957 | -9.85362 | -1.02162 | -1.85904 |
| C | -10.8128 | -0.70441 | -2.92106 | -10.8928 | -0.81929 | -2.81051 | -10.8906 | -0.85374 | -2.80514 |
| C | -10.4168 | 1.683325 | -2.76401 | -10.4603 | 1.569754 | -2.79189 | -10.4576 | 1.535575 | -2.81669 |
| C | -11.129  | 0.590714 | -3.32698 | -11.1997 | 0.457102 | -3.27671 | -11.1957 | 0.416724 | -3.28897 |
| C | -8.09785 | -4.77057 | 0.909159 | -8.04217 | -4.71114 | 1.172742 | -8.04635 | -4.69806 | 1.228757 |
| C | -7.13739 | -4.36916 | -0.01741 | -7.05733 | -4.34579 | 0.257223 | -7.06553 | -4.34474 | 0.304226 |
| C | -6.96727 | -2.99745 | -0.31418 | -6.9013  | -2.9906  | -0.11311 | -6.91041 | -2.99442 | -0.08372 |
| C | -8.66072 | -2.43501 | 1.203951 | -8.65825 | -2.37677 | 1.315718 | -8.66001 | -2.36164 | 1.346013 |
| C | -8.89368 | -3.78337 | 1.549639 | -8.87648 | -3.70621 | 1.733098 | -8.87767 | -3.68584 | 1.780281 |
| C | -9.41602 | -1.38744 | 1.813983 | -9.44006 | -1.30955 | 1.853131 | -9.43983 | -1.28768 | 1.872046 |
| C | -9.79297 | 0.919897 | 1.965867 | -9.85262 | 0.99903  | 1.869572 | -9.85362 | 1.021623 | 1.859041 |
| C | -10.8128 | 0.704408 | 2.921057 | -10.8928 | 0.819291 | 2.810512 | -10.8906 | 0.853741 | 2.805142 |

|   |          |          |          |          |          |          |          |          |          |
|---|----------|----------|----------|----------|----------|----------|----------|----------|----------|
| C | -10.4168 | -1.68333 | 2.764008 | -10.4603 | -1.56975 | 2.791886 | -10.4576 | -1.53558 | 2.816691 |
| C | -11.129  | -0.59071 | 3.32698  | -11.1997 | -0.4571  | 3.276706 | -11.1957 | -0.41672 | 3.288966 |
| C | -9.91997 | -4.07524 | 2.525166 | -9.92302 | -3.96206 | 2.696428 | -9.92134 | -3.92911 | 2.749938 |
| C | -10.6523 | -3.06822 | 3.105544 | -10.6857 | -2.93713 | 3.201842 | -10.6821 | -2.89754 | 3.244607 |
| C | -10.6523 | 3.068218 | -3.10554 | -10.6857 | 2.937125 | -3.20184 | -10.6821 | 2.897542 | -3.24461 |
| C | -9.91997 | 4.075243 | -2.52517 | -9.92302 | 3.96206  | -2.69643 | -9.92134 | 3.929107 | -2.74994 |
| C | 9.919973 | -4.07524 | -2.52517 | 9.923017 | -3.96206 | -2.69643 | 9.921335 | -3.92911 | -2.74994 |
| C | 10.65225 | -3.06822 | -3.10554 | 10.68569 | -2.93713 | -3.20184 | 10.68214 | -2.89754 | -3.24461 |
| C | 10.65225 | 3.068218 | 3.105544 | 10.68569 | 2.937125 | 3.201842 | 10.68214 | 2.897542 | 3.244607 |
| C | 9.919973 | 4.075243 | 2.525166 | 9.923017 | 3.96206  | 2.696428 | 9.921335 | 3.929107 | 2.749938 |
| H | 6.511142 | 5.093508 | -0.52498 | 6.401199 | 5.085798 | -0.18511 | 6.411932 | 5.090588 | -0.13199 |
| H | 6.231542 | 2.668821 | -1.03986 | 6.146226 | 2.688682 | -0.83019 | 6.158816 | 2.702147 | -0.80852 |
| H | 9.528518 | -1.92148 | 1.645143 | 9.593698 | -1.98582 | 1.501842 | 9.596507 | -2.00355 | 1.477359 |
| H | 11.33581 | -1.56234 | 3.327191 | 11.43763 | -1.68906 | 3.157703 | 11.43481 | -1.72774 | 3.142424 |
| H | 6.511142 | -5.09351 | 0.524975 | 6.401199 | -5.0858  | 0.185113 | 6.411932 | -5.09059 | 0.131991 |
| H | 6.231542 | -2.66882 | 1.039855 | 6.146226 | -2.68868 | 0.830185 | 6.158816 | -2.70215 | 0.808516 |
| H | 9.528518 | 1.921483 | -1.64514 | 9.593698 | 1.985817 | -1.50184 | 9.596507 | 2.003554 | -1.47736 |
| H | 11.33581 | 1.562338 | -3.32719 | 11.43763 | 1.689058 | -3.1577  | 11.43481 | 1.727741 | -3.14242 |
| H | 2.751948 | -0.02228 | 3.451598 | 2.758983 | -0.10058 | 3.432171 | 2.758671 | -0.1121  | 3.431434 |
| H | 5.0323   | -0.03816 | 4.544444 | 5.027392 | -0.14717 | 4.541656 | 5.027638 | -0.16518 | 4.53927  |
| H | 7.074883 | -0.05093 | 3.110595 | 7.084687 | -0.12731 | 3.122304 | 7.085105 | -0.14266 | 3.120966 |
| H | 7.074883 | 0.050934 | -3.1106  | 7.084687 | 0.12731  | -3.1223  | 7.085105 | 0.142655 | -3.12097 |
| H | 5.0323   | 0.038164 | -4.54444 | 5.027392 | 0.147173 | -4.54166 | 5.027638 | 0.165179 | -4.53927 |
| H | 2.751948 | 0.02228  | -3.4516  | 2.758983 | 0.100584 | -3.43217 | 2.758671 | 0.112103 | -3.43143 |
| H | -2.75195 | -0.02228 | -3.4516  | -2.75898 | -0.10058 | -3.43217 | -2.75867 | -0.1121  | -3.43143 |
| H | -5.0323  | -0.03816 | -4.54444 | -5.02739 | -0.14717 | -4.54166 | -5.02764 | -0.16518 | -4.53927 |
| H | -7.07488 | -0.05093 | -3.1106  | -7.08469 | -0.12731 | -3.1223  | -7.08511 | -0.14266 | -3.12097 |
| H | -2.75195 | 0.02228  | 3.451598 | -2.75898 | 0.100584 | 3.432171 | -2.75867 | 0.112103 | 3.431434 |
| H | -5.0323  | 0.038164 | 4.544444 | -5.02739 | 0.147173 | 4.541656 | -5.02764 | 0.165179 | 4.53927  |
| H | -7.07488 | 0.050934 | 3.110595 | -7.08469 | 0.12731  | 3.122304 | -7.08511 | 0.142655 | 3.120966 |
| H | -6.51114 | 5.093508 | 0.524975 | -6.4012  | 5.085798 | 0.185113 | -6.41193 | 5.090588 | 0.131991 |
| H | -6.23154 | 2.668821 | 1.039855 | -6.14623 | 2.688682 | 0.830185 | -6.15882 | 2.702147 | 0.808516 |
| H | -9.52852 | -1.92148 | -1.64514 | -9.5937  | -1.98582 | -1.50184 | -9.59651 | -2.00355 | -1.47736 |
| H | -11.3358 | -1.56234 | -3.32719 | -11.4376 | -1.68906 | -3.1577  | -11.4348 | -1.72774 | -3.14242 |
| H | -6.51114 | -5.09351 | -0.52498 | -6.4012  | -5.0858  | -0.18511 | -6.41193 | -5.09059 | -0.13199 |
| H | -6.23154 | -2.66882 | -1.03986 | -6.14623 | -2.68868 | -0.83019 | -6.15882 | -2.70215 | -0.80852 |
| H | -9.52852 | 1.921483 | 1.645143 | -9.5937  | 1.985817 | 1.501842 | -9.59651 | 2.003554 | 1.477359 |
| H | -11.3358 | 1.562338 | 3.327191 | -11.4376 | 1.689058 | 3.157703 | -11.4348 | 1.727741 | 3.142424 |
| H | -8.24177 | -5.82087 | 1.144094 | -8.17425 | -5.74913 | 1.462735 | -8.17774 | -5.73232 | 1.532047 |
| H | -11.9071 | -0.77091 | 4.062661 | -11.9931 | -0.60845 | 4.00229  | -11.9871 | -0.55874 | 4.018651 |
| H | -10.1008 | -5.11356 | 2.788855 | -10.0943 | -4.98695 | 3.0126   | -10.0923 | -4.94992 | 3.079177 |
| H | -11.4236 | -3.29519 | 3.836099 | -11.4724 | -3.13673 | 3.923682 | -11.4669 | -3.08769 | 3.971069 |

|   |          |          |          |          |          |          |          |          |          |
|---|----------|----------|----------|----------|----------|----------|----------|----------|----------|
| H | -8.24177 | 5.820866 | -1.14409 | -8.17425 | 5.749134 | -1.46274 | -8.17774 | 5.732321 | -1.53205 |
| H | -11.9071 | 0.770913 | -4.06266 | -11.9931 | 0.608448 | -4.00229 | -11.9871 | 0.558736 | -4.01865 |
| H | -11.4236 | 3.295193 | -3.8361  | -11.4724 | 3.136731 | -3.92368 | -11.4669 | 3.087688 | -3.97107 |
| H | -10.1008 | 5.113555 | -2.78886 | -10.0943 | 4.986945 | -3.0126  | -10.0923 | 4.949916 | -3.07918 |
| H | 8.241773 | -5.82087 | -1.14409 | 8.174249 | -5.74913 | -1.46274 | 8.177736 | -5.73232 | -1.53205 |
| H | 11.90708 | -0.77091 | -4.06266 | 11.99307 | -0.60845 | -4.00229 | 11.98708 | -0.55874 | -4.01865 |
| H | 10.10078 | -5.11356 | -2.78886 | 10.09426 | -4.98695 | -3.0126  | 10.09232 | -4.94992 | -3.07918 |
| H | 11.42359 | -3.29519 | -3.8361  | 11.47236 | -3.13673 | -3.92368 | 11.46687 | -3.08769 | -3.97107 |
| H | 8.241773 | 5.820866 | 1.144094 | 8.174249 | 5.749134 | 1.462735 | 8.177736 | 5.732321 | 1.532047 |
| H | 11.90708 | 0.770913 | 4.062661 | 11.99307 | 0.608448 | 4.00229  | 11.98708 | 0.558736 | 4.018651 |
| H | 11.42359 | 3.295193 | 3.836099 | 11.47236 | 3.136731 | 3.923682 | 11.46687 | 3.087688 | 3.971069 |
| H | 10.10078 | 5.113555 | 2.788855 | 10.09426 | 4.986945 | 3.0126   | 10.09232 | 4.949916 | 3.079177 |

---

| Os4    |          | S0       |          |          | S1       |          |          | T1       |          |  |
|--------|----------|----------|----------|----------|----------|----------|----------|----------|----------|--|
| Symbol | X        | Y        | Z        | X        | Y        | Z        | X        | Y        | Z        |  |
| Os     | -7.60791 | 0        | 0        | -7.61716 | 0        | 0        | -7.62235 | 0        | 0        |  |
| Os     | 7.607908 | 0        | 0        | 7.617156 | 0        | 0        | 7.622348 | 0        | 0        |  |
| N      | 7.716529 | 2.02948  | 0.34956  | 7.692109 | 2.027273 | 0.366482 | 7.698189 | 2.030368 | 0.361572 |  |
| N      | 9.091376 | 0.07201  | 1.427597 | 9.127669 | 0.082614 | 1.402371 | 9.125208 | 0.08411  | 1.405981 |  |
| N      | 7.716529 | -2.02948 | -0.34956 | 7.692109 | -2.02727 | -0.36648 | 7.698189 | -2.03037 | -0.36157 |  |
| N      | 9.091376 | -0.07201 | -1.4276  | 9.127669 | -0.08261 | -1.40237 | 9.125208 | -0.08411 | -1.40598 |  |
| N      | 1.172818 | -0.01166 | 1.417117 | 1.171233 | -0.00448 | 1.422374 | 1.170312 | 0.000001 | 1.425553 |  |
| N      | 1.172818 | 0.01166  | -1.41712 | 1.171233 | 0.004476 | -1.42237 | 1.170312 | -1E-06   | -1.42555 |  |
| N      | 6.018671 | -0.05785 | 1.313807 | 6.035859 | -0.03582 | 1.326761 | 6.033992 | -0.0233  | 1.325919 |  |
| N      | 6.018671 | 0.057849 | -1.31381 | 6.035859 | 0.035824 | -1.32676 | 6.033992 | 0.023295 | -1.32592 |  |
| N      | -1.17282 | 0.01166  | 1.417117 | -1.17123 | 0.004476 | 1.422374 | -1.17031 | -1E-06   | 1.425553 |  |
| N      | -1.17282 | -0.01166 | -1.41712 | -1.17123 | -0.00448 | -1.42237 | -1.17031 | 0.000001 | -1.42555 |  |
| N      | -6.01867 | -0.05785 | -1.31381 | -6.03586 | -0.03582 | -1.32676 | -6.03399 | -0.0233  | -1.32592 |  |
| N      | -6.01867 | 0.057849 | 1.313807 | -6.03586 | 0.035824 | 1.326761 | -6.03399 | 0.023295 | 1.325919 |  |
| N      | -7.71653 | 2.02948  | -0.34956 | -7.69211 | 2.027273 | -0.36648 | -7.69819 | 2.030368 | -0.36157 |  |
| N      | -9.09138 | 0.07201  | -1.4276  | -9.12767 | 0.082614 | -1.40237 | -9.12521 | 0.08411  | -1.40598 |  |
| N      | -7.71653 | -2.02948 | 0.34956  | -7.69211 | -2.02727 | 0.366482 | -7.69819 | -2.03037 | 0.361572 |  |
| N      | -9.09138 | -0.07201 | 1.427597 | -9.12767 | -0.08261 | 1.402371 | -9.12521 | -0.08411 | 1.405981 |  |
| C      | 8.026093 | 4.756806 | 1.103145 | 7.965577 | 4.747996 | 1.138675 | 7.965005 | 4.750088 | 1.138647 |  |
| C      | 7.125202 | 4.351277 | 0.110335 | 7.033089 | 4.331965 | 0.179682 | 7.04425  | 4.33569  | 0.167764 |  |
| C      | 6.991908 | 2.996928 | -0.2477  | 6.915003 | 2.978866 | -0.18675 | 6.929686 | 2.982924 | -0.20138 |  |
| C      | 8.625491 | 2.402606 | 1.317984 | 8.625156 | 2.407558 | 1.308735 | 8.620554 | 2.408893 | 1.314696 |  |
| C      | 8.834847 | 3.743098 | 1.712654 | 8.819376 | 3.747429 | 1.709626 | 8.811318 | 3.748405 | 1.718769 |  |
| C      | 9.384374 | 1.335431 | 1.898033 | 9.413433 | 1.349796 | 1.865576 | 9.404314 | 1.350692 | 1.876333 |  |
| C      | 9.806474 | -0.96553 | 1.907013 | 9.873653 | -0.94642 | 1.848398 | 9.870733 | -0.94543 | 1.854212 |  |
| C      | 10.79651 | -0.7916  | 2.891687 | 10.88806 | -0.76102 | 2.805615 | 10.87586 | -0.76116 | 2.820399 |  |
| C      | 10.37429 | 1.591853 | 2.873181 | 10.4274  | 1.61814  | 2.811003 | 10.40978 | 1.617481 | 2.831047 |  |
| C      | 11.08953 | 0.474335 | 3.414362 | 11.17327 | 0.507325 | 3.326958 | 11.15328 | 0.506114 | 3.349732 |  |
| C      | 8.026093 | -4.75681 | -1.10315 | 7.965577 | -4.748   | -1.13868 | 7.965005 | -4.75009 | -1.13865 |  |
| C      | 7.125202 | -4.35128 | -0.11034 | 7.033089 | -4.33197 | -0.17968 | 7.04425  | -4.33569 | -0.16776 |  |
| C      | 6.991908 | -2.99693 | 0.247695 | 6.915003 | -2.97887 | 0.186748 | 6.929686 | -2.98292 | 0.201384 |  |
| C      | 8.625491 | -2.40261 | -1.31798 | 8.625156 | -2.40756 | -1.30874 | 8.620554 | -2.40889 | -1.3147  |  |
| C      | 8.834847 | -3.7431  | -1.71265 | 8.819376 | -3.74743 | -1.70963 | 8.811318 | -3.74841 | -1.71877 |  |
| C      | 9.384374 | -1.33543 | -1.89803 | 9.413433 | -1.3498  | -1.86558 | 9.404314 | -1.35069 | -1.87633 |  |
| C      | 9.806474 | 0.965529 | -1.90701 | 9.873653 | 0.946422 | -1.8484  | 9.870733 | 0.945425 | -1.85421 |  |
| C      | 10.79651 | 0.791599 | -2.89169 | 10.88806 | 0.761022 | -2.80562 | 10.87586 | 0.761159 | -2.8204  |  |
| C      | 10.37429 | -1.59185 | -2.87318 | 10.4274  | -1.61814 | -2.811   | 10.40978 | -1.61748 | -2.83105 |  |
| C      | 11.08953 | -0.47434 | -3.41436 | 11.17327 | -0.50733 | -3.32696 | 11.15328 | -0.50611 | -3.34973 |  |
| C      | 2.316038 | 0.011325 | -0.72808 | 2.329531 | 0.004057 | -0.71814 | 2.33192  | -4.8E-05 | -0.7133  |  |
| C      | 2.316038 | -0.01133 | 0.72808  | 2.329531 | -0.00406 | 0.718138 | 2.33192  | 0.000048 | 0.7133   |  |

|   |          |          |          |          |          |          |          |          |          |
|---|----------|----------|----------|----------|----------|----------|----------|----------|----------|
| C | 3.586532 | -0.0359  | 1.456698 | 3.592449 | -0.01505 | 1.44078  | 3.593184 | -0.0036  | 1.439121 |
| C | 4.781627 | -0.02399 | 0.722137 | 4.801059 | -0.01461 | 0.714455 | 4.800515 | -0.00808 | 0.717234 |
| C | 4.781627 | 0.023992 | -0.72214 | 4.801059 | 0.014613 | -0.71446 | 4.800515 | 0.008076 | -0.71723 |
| C | 3.586532 | 0.035898 | -1.4567  | 3.592449 | 0.015051 | -1.44078 | 3.593184 | 0.0036   | -1.43912 |
| C | 3.662743 | -0.07587 | 2.863276 | 3.674581 | -0.02787 | 2.85216  | 3.674645 | -0.00433 | 2.852959 |
| C | 4.925996 | -0.10234 | 3.465305 | 4.929902 | -0.03502 | 3.465239 | 4.929424 | -0.00494 | 3.463751 |
| C | 6.083931 | -0.09226 | 2.66845  | 6.098007 | -0.03551 | 2.674436 | 6.098598 | -0.01153 | 2.674204 |
| C | 6.083931 | 0.092255 | -2.66845 | 6.098007 | 0.03551  | -2.67444 | 6.098598 | 0.011527 | -2.6742  |
| C | 4.925996 | 0.102338 | -3.46531 | 4.929902 | 0.035024 | -3.46524 | 4.929424 | 0.004937 | -3.46375 |
| C | 3.662743 | 0.075871 | -2.86328 | 3.674581 | 0.027872 | -2.85216 | 3.674645 | 0.004331 | -2.85296 |
| C | 0        | 0        | 0.719631 | 0        | 0        | 0.729805 | 0        | 0        | 0.733563 |
| C | 0        | 0        | -0.71963 | 0        | 0        | -0.72981 | 0        | 0        | -0.73356 |
| C | -2.31604 | -0.01133 | -0.72808 | -2.32953 | -0.00406 | -0.71814 | -2.33192 | 0.000048 | -0.7133  |
| C | -2.31604 | 0.011325 | 0.72808  | -2.32953 | 0.004057 | 0.718138 | -2.33192 | -4.8E-05 | 0.7133   |
| C | -3.58653 | -0.0359  | -1.4567  | -3.59245 | -0.01505 | -1.44078 | -3.59318 | -0.0036  | -1.43912 |
| C | -4.78163 | -0.02399 | -0.72214 | -4.80106 | -0.01461 | -0.71446 | -4.80052 | -0.00808 | -0.71723 |
| C | -4.78163 | 0.023992 | 0.722137 | -4.80106 | 0.014613 | 0.714455 | -4.80052 | 0.008076 | 0.717234 |
| C | -3.58653 | 0.035898 | 1.456698 | -3.59245 | 0.015051 | 1.44078  | -3.59318 | 0.0036   | 1.439121 |
| C | -3.66274 | -0.07587 | -2.86328 | -3.67458 | -0.02787 | -2.85216 | -3.67465 | -0.00433 | -2.85296 |
| C | -4.926   | -0.10234 | -3.46531 | -4.9299  | -0.03502 | -3.46524 | -4.92942 | -0.00494 | -3.46375 |
| C | -6.08393 | -0.09226 | -2.66845 | -6.09801 | -0.03551 | -2.67444 | -6.0986  | -0.01153 | -2.6742  |
| C | -3.66274 | 0.075871 | 2.863276 | -3.67458 | 0.027872 | 2.85216  | -3.67465 | 0.004331 | 2.852959 |
| C | -4.926   | 0.102338 | 3.465305 | -4.9299  | 0.035024 | 3.465239 | -4.92942 | 0.004937 | 3.463751 |
| C | -6.08393 | 0.092255 | 2.66845  | -6.09801 | 0.03551  | 2.674436 | -6.0986  | 0.011527 | 2.674204 |
| C | -8.02609 | 4.756806 | -1.10315 | -7.96558 | 4.747996 | -1.13868 | -7.96501 | 4.750088 | -1.13865 |
| C | -7.1252  | 4.351277 | -0.11034 | -7.03309 | 4.331965 | -0.17968 | -7.04425 | 4.33569  | -0.16776 |
| C | -6.99191 | 2.996928 | 0.247695 | -6.915   | 2.978866 | 0.186748 | -6.92969 | 2.982924 | 0.201384 |
| C | -8.62549 | 2.402606 | -1.31798 | -8.62516 | 2.407558 | -1.30874 | -8.62055 | 2.408893 | -1.3147  |
| C | -8.83485 | 3.743098 | -1.71265 | -8.81938 | 3.747429 | -1.70963 | -8.81132 | 3.748405 | -1.71877 |
| C | -9.38437 | 1.335431 | -1.89803 | -9.41343 | 1.349796 | -1.86558 | -9.40431 | 1.350692 | -1.87633 |
| C | -9.80647 | -0.96553 | -1.90701 | -9.87365 | -0.94642 | -1.8484  | -9.87073 | -0.94543 | -1.85421 |
| C | -10.7965 | -0.7916  | -2.89169 | -10.8881 | -0.76102 | -2.80562 | -10.8759 | -0.76116 | -2.8204  |
| C | -10.3743 | 1.591853 | -2.87318 | -10.4274 | 1.61814  | -2.811   | -10.4098 | 1.617481 | -2.83105 |
| C | -11.0895 | 0.474335 | -3.41436 | -11.1733 | 0.507325 | -3.32696 | -11.1533 | 0.506114 | -3.34973 |
| C | -8.02609 | -4.75681 | 1.103145 | -7.96558 | -4.748   | 1.138675 | -7.96501 | -4.75009 | 1.138647 |
| C | -7.1252  | -4.35128 | 0.110335 | -7.03309 | -4.33197 | 0.179682 | -7.04425 | -4.33569 | 0.167764 |
| C | -6.99191 | -2.99693 | -0.2477  | -6.915   | -2.97887 | -0.18675 | -6.92969 | -2.98292 | -0.20138 |
| C | -8.62549 | -2.40261 | 1.317984 | -8.62516 | -2.40756 | 1.308735 | -8.62055 | -2.40889 | 1.314696 |
| C | -8.83485 | -3.7431  | 1.712654 | -8.81938 | -3.74743 | 1.709626 | -8.81132 | -3.74841 | 1.718769 |
| C | -9.38437 | -1.33543 | 1.898033 | -9.41343 | -1.3498  | 1.865576 | -9.40431 | -1.35069 | 1.876333 |
| C | -9.80647 | 0.965529 | 1.907013 | -9.87365 | 0.946422 | 1.848398 | -9.87073 | 0.945425 | 1.854212 |
| C | -10.7965 | 0.791599 | 2.891687 | -10.8881 | 0.761022 | 2.805615 | -10.8759 | 0.761159 | 2.820399 |

|   |          |          |          |          |          |          |          |          |          |
|---|----------|----------|----------|----------|----------|----------|----------|----------|----------|
| C | -10.3743 | -1.59185 | 2.873181 | -10.4274 | -1.61814 | 2.811003 | -10.4098 | -1.61748 | 2.831047 |
| C | -11.0895 | -0.47434 | 3.414362 | -11.1733 | -0.50733 | 3.326958 | -11.1533 | -0.50611 | 3.349732 |
| C | -9.90056 | -3.99668 | 2.655158 | -9.91035 | -4.01529 | 2.617889 | -9.89295 | -4.01475 | 2.638418 |
| C | -10.6341 | -2.97419 | 3.204798 | -10.6778 | -3.00256 | 3.13897  | -10.6558 | -3.00125 | 3.164744 |
| C | -10.6341 | 2.974191 | -3.2048  | -10.6778 | 3.002557 | -3.13897 | -10.6558 | 3.001251 | -3.16474 |
| C | -9.90056 | 3.996684 | -2.65516 | -9.91035 | 4.015291 | -2.61789 | -9.89295 | 4.014747 | -2.63842 |
| C | 9.900555 | -3.99668 | -2.65516 | 9.910346 | -4.01529 | -2.61789 | 9.89295  | -4.01475 | -2.63842 |
| C | 10.63414 | -2.97419 | -3.2048  | 10.67777 | -3.00256 | -3.13897 | 10.65584 | -3.00125 | -3.16474 |
| C | 10.63414 | 2.974191 | 3.204798 | 10.67777 | 3.002557 | 3.13897  | 10.65584 | 3.001251 | 3.164744 |
| C | 9.900555 | 3.996684 | 2.655158 | 9.910346 | 4.015291 | 2.617889 | 9.89295  | 4.014747 | 2.638418 |
| C | 8.097774 | 6.18893  | 1.490332 | 8.021048 | 6.177385 | 1.535005 | 8.017488 | 6.179155 | 1.536674 |
| C | 8.07673  | 6.576835 | 2.84809  | 8.047304 | 6.554281 | 2.895859 | 8.028016 | 6.554935 | 2.898017 |
| C | 8.124637 | 7.185639 | 0.491062 | 7.983071 | 7.180728 | 0.542617 | 7.993215 | 7.183293 | 0.544704 |
| C | 8.092838 | 7.936043 | 3.198751 | 8.045621 | 7.91095  | 3.255779 | 8.024466 | 7.911337 | 3.258986 |
| C | 8.149593 | 8.54476  | 0.842159 | 7.992092 | 8.537266 | 0.903141 | 8.000217 | 8.53955  | 0.906405 |
| C | 8.134664 | 8.924015 | 2.197339 | 8.023582 | 8.906195 | 2.260937 | 8.016174 | 8.907386 | 2.264756 |
| C | 12.09899 | 0.606857 | 4.495869 | 12.20688 | 0.650987 | 4.382704 | 12.17659 | 0.647583 | 4.415269 |
| C | 11.82783 | 1.364525 | 5.656357 | 11.95405 | 1.405705 | 5.549274 | 11.91286 | 1.400037 | 5.581013 |
| C | 13.32654 | -0.08312 | 4.396799 | 13.43911 | -0.02553 | 4.253194 | 13.40997 | -0.02894 | 4.296022 |
| C | 12.77152 | 1.438232 | 6.693008 | 12.92131 | 1.48962  | 6.562903 | 12.87048 | 1.481612 | 6.603866 |
| C | 14.27376 | -0.00227 | 5.429826 | 14.41004 | 0.067338 | 5.262606 | 14.37131 | 0.061843 | 5.314637 |
| C | 13.99922 | 0.759322 | 6.58102  | 14.15388 | 0.825461 | 6.420355 | 14.10429 | 0.817613 | 6.471506 |
| C | 12.09899 | -0.60686 | -4.49587 | 12.20688 | -0.65099 | -4.3827  | 12.17659 | -0.64758 | -4.41527 |
| C | 11.82783 | -1.36453 | -5.65636 | 11.95405 | -1.40571 | -5.54927 | 11.91286 | -1.40004 | -5.58101 |
| C | 13.32654 | 0.083118 | -4.3968  | 13.43911 | 0.025527 | -4.25319 | 13.40997 | 0.028939 | -4.29602 |
| C | 12.77152 | -1.43823 | -6.69301 | 12.92131 | -1.48962 | -6.5629  | 12.87048 | -1.48161 | -6.60387 |
| C | 14.27376 | 0.00227  | -5.42983 | 14.41004 | -0.06734 | -5.26261 | 14.37131 | -0.06184 | -5.31464 |
| C | 13.99922 | -0.75932 | -6.58102 | 14.15388 | -0.82546 | -6.42036 | 14.10429 | -0.81761 | -6.47151 |
| C | 8.097774 | -6.18893 | -1.49033 | 8.021048 | -6.17739 | -1.53501 | 8.017488 | -6.17916 | -1.53667 |
| C | 8.07673  | -6.57684 | -2.84809 | 8.047304 | -6.55428 | -2.89586 | 8.028016 | -6.55494 | -2.89802 |
| C | 8.124637 | -7.18564 | -0.49106 | 7.983071 | -7.18073 | -0.54262 | 7.993215 | -7.18329 | -0.5447  |
| C | 8.092838 | -7.93604 | -3.19875 | 8.045621 | -7.91095 | -3.25578 | 8.024466 | -7.91134 | -3.25899 |
| C | 8.149593 | -8.54476 | -0.84216 | 7.992092 | -8.53727 | -0.90314 | 8.000217 | -8.53955 | -0.90641 |
| C | 8.134664 | -8.92402 | -2.19734 | 8.023582 | -8.9062  | -2.26094 | 8.016174 | -8.90739 | -2.26476 |
| C | -8.09777 | 6.18893  | -1.49033 | -8.02105 | 6.177385 | -1.53501 | -8.01749 | 6.179155 | -1.53667 |
| C | -8.07673 | 6.576835 | -2.84809 | -8.0473  | 6.554281 | -2.89586 | -8.02802 | 6.554935 | -2.89802 |
| C | -8.12464 | 7.185639 | -0.49106 | -7.98307 | 7.180728 | -0.54262 | -7.99322 | 7.183293 | -0.5447  |
| C | -8.09284 | 7.936043 | -3.19875 | -8.04562 | 7.91095  | -3.25578 | -8.02447 | 7.911337 | -3.25899 |
| C | -8.14959 | 8.54476  | -0.84216 | -7.99209 | 8.537266 | -0.90314 | -8.00022 | 8.53955  | -0.90641 |
| C | -8.13466 | 8.924015 | -2.19734 | -8.02358 | 8.906195 | -2.26094 | -8.01617 | 8.907386 | -2.26476 |
| C | -12.099  | 0.606857 | -4.49587 | -12.2069 | 0.650987 | -4.3827  | -12.1766 | 0.647583 | -4.41527 |
| C | -11.8278 | 1.364525 | -5.65636 | -11.954  | 1.405705 | -5.54927 | -11.9129 | 1.400037 | -5.58101 |



|   |          |          |          |          |          |          |          |          |          |
|---|----------|----------|----------|----------|----------|----------|----------|----------|----------|
| C | -13.3265 | -0.08312 | -4.3968  | -13.4391 | -0.02553 | -4.25319 | -13.41   | -0.02894 | -4.29602 |
| C | -12.7715 | 1.438232 | -6.69301 | -12.9213 | 1.48962  | -6.5629  | -12.8705 | 1.481612 | -6.60387 |
| C | -14.2738 | -0.00227 | -5.42983 | -14.41   | 0.067338 | -5.26261 | -14.3713 | 0.061843 | -5.31464 |
| C | -13.9992 | 0.759322 | -6.58102 | -14.1539 | 0.825461 | -6.42036 | -14.1043 | 0.817613 | -6.47151 |
| C | -12.099  | -0.60686 | 4.495869 | -12.2069 | -0.65099 | 4.382704 | -12.1766 | -0.64758 | 4.415269 |
| C | -11.8278 | -1.36453 | 5.656357 | -11.954  | -1.40571 | 5.549274 | -11.9129 | -1.40004 | 5.581013 |
| C | -13.3265 | 0.083118 | 4.396799 | -13.4391 | 0.025527 | 4.253194 | -13.41   | 0.028939 | 4.296022 |
| C | -12.7715 | -1.43823 | 6.693008 | -12.9213 | -1.48962 | 6.562903 | -12.8705 | -1.48161 | 6.603866 |
| C | -14.2738 | 0.00227  | 5.429826 | -14.41   | -0.06734 | 5.262606 | -14.3713 | -0.06184 | 5.314637 |
| C | -13.9992 | -0.75932 | 6.58102  | -14.1539 | -0.82546 | 6.420355 | -14.1043 | -0.81761 | 6.471506 |
| C | -8.09777 | -6.18893 | 1.490332 | -8.02105 | -6.17739 | 1.535005 | -8.01749 | -6.17916 | 1.536674 |
| C | -8.07673 | -6.57684 | 2.84809  | -8.0473  | -6.55428 | 2.895859 | -8.02802 | -6.55494 | 2.898017 |
| C | -8.12464 | -7.18564 | 0.491062 | -7.98307 | -7.18073 | 0.542617 | -7.99322 | -7.18329 | 0.544704 |
| C | -8.09284 | -7.93604 | 3.198751 | -8.04562 | -7.91095 | 3.255779 | -8.02447 | -7.91134 | 3.258986 |
| C | -8.14959 | -8.54476 | 0.842159 | -7.99209 | -8.53727 | 0.903141 | -8.00022 | -8.53955 | 0.906405 |
| C | -8.13466 | -8.92402 | 2.197339 | -8.02358 | -8.9062  | 2.260937 | -8.01617 | -8.90739 | 2.264756 |
| H | 6.488264 | 5.081069 | -0.37859 | 6.359851 | 5.051482 | -0.27397 | 6.37729  | 5.05609  | -0.29367 |
| H | 6.289974 | 2.687938 | -1.01412 | 6.188108 | 2.661012 | -0.9256  | 6.211747 | 2.6663   | -0.94964 |
| H | 9.570242 | -1.95055 | 1.520436 | 9.642432 | -1.93312 | 1.462798 | 9.645492 | -1.93107 | 1.462535 |
| H | 11.31045 | -1.66944 | 3.269313 | 11.4262  | -1.63181 | 3.164563 | 11.41305 | -1.63201 | 3.180535 |
| H | 6.488264 | -5.08107 | 0.378589 | 6.359851 | -5.05148 | 0.273967 | 6.37729  | -5.05609 | 0.293674 |
| H | 6.289974 | -2.68794 | 1.014115 | 6.188108 | -2.66101 | 0.925597 | 6.211747 | -2.6663  | 0.949638 |
| H | 9.570242 | 1.950553 | -1.52044 | 9.642432 | 1.933118 | -1.4628  | 9.645492 | 1.931069 | -1.46254 |
| H | 11.31045 | 1.669437 | -3.26931 | 11.4262  | 1.631806 | -3.16456 | 11.41305 | 1.632011 | -3.18054 |
| H | 2.750728 | -0.08665 | 3.449803 | 2.758476 | -0.03026 | 3.433099 | 2.758226 | -0.00248 | 3.432968 |
| H | 5.030578 | -0.13303 | 4.543201 | 5.026756 | -0.04256 | 4.544203 | 5.02678  | -0.00261 | 4.542839 |
| H | 7.073422 | -0.12216 | 3.110557 | 7.084353 | -0.0498  | 3.125098 | 7.084664 | -0.02186 | 3.125039 |
| H | 7.073422 | 0.122164 | -3.11056 | 7.084353 | 0.049801 | -3.1251  | 7.084664 | 0.021855 | -3.12504 |
| H | 5.030578 | 0.133029 | -4.5432  | 5.026756 | 0.042564 | -4.5442  | 5.02678  | 0.002611 | -4.54284 |
| H | 2.750728 | 0.086649 | -3.4498  | 2.758476 | 0.030259 | -3.4331  | 2.758226 | 0.002481 | -3.43297 |
| H | -2.75073 | -0.08665 | -3.4498  | -2.75848 | -0.03026 | -3.4331  | -2.75823 | -0.00248 | -3.43297 |
| H | -5.03058 | -0.13303 | -4.5432  | -5.02676 | -0.04256 | -4.5442  | -5.02678 | -0.00261 | -4.54284 |
| H | -7.07342 | -0.12216 | -3.11056 | -7.08435 | -0.0498  | -3.1251  | -7.08466 | -0.02186 | -3.12504 |
| H | -2.75073 | 0.086649 | 3.449803 | -2.75848 | 0.030259 | 3.433099 | -2.75823 | 0.002481 | 3.432968 |
| H | -5.03058 | 0.133029 | 4.543201 | -5.02676 | 0.042564 | 4.544203 | -5.02678 | 0.002611 | 4.542839 |
| H | -7.07342 | 0.122164 | 3.110557 | -7.08435 | 0.049801 | 3.125098 | -7.08466 | 0.021855 | 3.125039 |
| H | -6.48826 | 5.081069 | 0.378589 | -6.35985 | 5.051482 | 0.273967 | -6.37729 | 5.05609  | 0.293674 |
| H | -6.28997 | 2.687938 | 1.014115 | -6.18811 | 2.661012 | 0.925597 | -6.21175 | 2.6663   | 0.949638 |
| H | -9.57024 | -1.95055 | -1.52044 | -9.64243 | -1.93312 | -1.4628  | -9.64549 | -1.93107 | -1.46254 |
| H | -11.3104 | -1.66944 | -3.26931 | -11.4262 | -1.63181 | -3.16456 | -11.4131 | -1.63201 | -3.18054 |
| H | -6.48826 | -5.08107 | -0.37859 | -6.35985 | -5.05148 | -0.27397 | -6.37729 | -5.05609 | -0.29367 |
| H | -6.28997 | -2.68794 | -1.01412 | -6.18811 | -2.66101 | -0.9256  | -6.21175 | -2.6663  | -0.94964 |

|   |          |          |          |          |          |          |          |          |          |
|---|----------|----------|----------|----------|----------|----------|----------|----------|----------|
| H | -9.57024 | 1.950553 | 1.520436 | -9.64243 | 1.933118 | 1.462798 | -9.64549 | 1.931069 | 1.462535 |
| H | -11.3104 | 1.669437 | 3.269313 | -11.4262 | 1.631806 | 3.164563 | -11.4131 | 1.632011 | 3.180535 |
| H | -10.1458 | -5.02482 | 2.900226 | -10.1463 | -5.04617 | 2.859781 | -10.1263 | -5.04521 | 2.88447  |
| H | -11.4531 | -3.2035  | 3.878539 | -11.5146 | -3.24202 | 3.786487 | -11.4866 | -3.23986 | 3.820338 |
| H | -11.4531 | 3.2035   | -3.87854 | -11.5146 | 3.242023 | -3.78649 | -11.4866 | 3.239863 | -3.82034 |
| H | -10.1458 | 5.024824 | -2.90023 | -10.1463 | 5.046173 | -2.85978 | -10.1263 | 5.045214 | -2.88447 |
| H | 10.1458  | -5.02482 | -2.90023 | 10.14626 | -5.04617 | -2.85978 | 10.12634 | -5.04521 | -2.88447 |
| H | 11.45312 | -3.2035  | -3.87854 | 11.51459 | -3.24202 | -3.78649 | 11.48657 | -3.23986 | -3.82034 |
| H | 11.45312 | 3.2035   | 3.878539 | 11.51459 | 3.242023 | 3.786487 | 11.48657 | 3.239863 | 3.820338 |
| H | 10.1458  | 5.024824 | 2.900226 | 10.14626 | 5.046173 | 2.859781 | 10.12634 | 5.045214 | 2.88447  |
| H | 8.014365 | 5.819992 | 3.62701  | 8.03366  | 5.791283 | 3.67101  | 8.003717 | 5.791342 | 3.672337 |
| H | 8.147149 | 6.896187 | -0.55754 | 7.969395 | 6.89929  | -0.50823 | 7.991709 | 6.902733 | -0.50647 |
| H | 8.067104 | 8.222577 | 4.246222 | 8.055409 | 8.189767 | 4.305498 | 8.022259 | 8.189307 | 4.308976 |
| H | 8.182187 | 9.302753 | 0.064732 | 7.97569  | 9.301252 | 0.131234 | 7.994379 | 9.304154 | 0.134954 |
| H | 8.151289 | 9.975725 | 2.469437 | 8.026893 | 9.956048 | 2.540414 | 8.018072 | 9.957016 | 2.545083 |
| H | 10.86925 | 1.867555 | 5.763233 | 10.99243 | 1.896988 | 5.680001 | 10.95002 | 1.890924 | 5.703908 |
| H | 13.54679 | -0.66387 | 3.503488 | 13.64471 | -0.60374 | 3.354827 | 13.62423 | -0.60512 | 3.398391 |
| H | 12.548   | 2.016577 | 7.584924 | 12.71253 | 2.064531 | 7.460478 | 12.65329 | 2.05456  | 7.500682 |
| H | 15.21982 | -0.52805 | 5.337334 | 15.35988 | -0.44673 | 5.147149 | 15.3222  | -0.45199 | 5.207041 |
| H | 14.73074 | 0.819964 | 7.382036 | 14.90375 | 0.894675 | 7.20344  | 14.84676 | 0.885107 | 7.261756 |
| H | 10.86925 | -1.86756 | -5.76323 | 10.99243 | -1.89699 | -5.68    | 10.95002 | -1.89092 | -5.70391 |
| H | 13.54679 | 0.663874 | -3.50349 | 13.64471 | 0.603737 | -3.35483 | 13.62423 | 0.605121 | -3.39839 |
| H | 12.548   | -2.01658 | -7.58492 | 12.71253 | -2.06453 | -7.46048 | 12.65329 | -2.05456 | -7.50068 |
| H | 15.21982 | 0.528046 | -5.33733 | 15.35988 | 0.446727 | -5.14715 | 15.3222  | 0.451988 | -5.20704 |
| H | 14.73074 | -0.81996 | -7.38204 | 14.90375 | -0.89468 | -7.20344 | 14.84676 | -0.88511 | -7.26176 |
| H | 8.014365 | -5.81999 | -3.62701 | 8.03366  | -5.79128 | -3.67101 | 8.003717 | -5.79134 | -3.67234 |
| H | 8.147149 | -6.89619 | 0.557536 | 7.969395 | -6.89929 | 0.50823  | 7.991709 | -6.90273 | 0.50647  |
| H | 8.067104 | -8.22258 | -4.24622 | 8.055409 | -8.18977 | -4.3055  | 8.022259 | -8.18931 | -4.30898 |
| H | 8.182187 | -9.30275 | -0.06473 | 7.97569  | -9.30125 | -0.13123 | 7.994379 | -9.30415 | -0.13495 |
| H | 8.151289 | -9.97573 | -2.46944 | 8.026893 | -9.95605 | -2.54041 | 8.018072 | -9.95702 | -2.54508 |
| H | -8.01437 | 5.819992 | -3.62701 | -8.03366 | 5.791283 | -3.67101 | -8.00372 | 5.791342 | -3.67234 |
| H | -8.14715 | 6.896187 | 0.557536 | -7.9694  | 6.89929  | 0.50823  | -7.99171 | 6.902733 | 0.50647  |
| H | -8.0671  | 8.222577 | -4.24622 | -8.05541 | 8.189767 | -4.3055  | -8.02226 | 8.189307 | -4.30898 |
| H | -8.18219 | 9.302753 | -0.06473 | -7.97569 | 9.301252 | -0.13123 | -7.99438 | 9.304154 | -0.13495 |
| H | -8.15129 | 9.975725 | -2.46944 | -8.02689 | 9.956048 | -2.54041 | -8.01807 | 9.957016 | -2.54508 |
| H | -10.8693 | 1.867555 | -5.76323 | -10.9924 | 1.896988 | -5.68    | -10.95   | 1.890924 | -5.70391 |
| H | -13.5468 | -0.66387 | -3.50349 | -13.6447 | -0.60374 | -3.35483 | -13.6242 | -0.60512 | -3.39839 |
| H | -12.548  | 2.016577 | -7.58492 | -12.7125 | 2.064531 | -7.46048 | -12.6533 | 2.05456  | -7.50068 |
| H | -15.2198 | -0.52805 | -5.33733 | -15.3599 | -0.44673 | -5.14715 | -15.3222 | -0.45199 | -5.20704 |
| H | -14.7307 | 0.819964 | -7.38204 | -14.9037 | 0.894675 | -7.20344 | -14.8468 | 0.885107 | -7.26176 |
| H | -10.8693 | -1.86756 | 5.763233 | -10.9924 | -1.89699 | 5.680001 | -10.95   | -1.89092 | 5.703908 |
| H | -13.5468 | 0.663874 | 3.503488 | -13.6447 | 0.603737 | 3.354827 | -13.6242 | 0.605121 | 3.398391 |

|   |          |          |          |          |          |          |          |          |          |
|---|----------|----------|----------|----------|----------|----------|----------|----------|----------|
| H | -12.548  | -2.01658 | 7.584924 | -12.7125 | -2.06453 | 7.460478 | -12.6533 | -2.05456 | 7.500682 |
| H | -15.2198 | 0.528046 | 5.337334 | -15.3599 | 0.446727 | 5.147149 | -15.3222 | 0.451988 | 5.207041 |
| H | -14.7307 | -0.81996 | 7.382036 | -14.9037 | -0.89468 | 7.20344  | -14.8468 | -0.88511 | 7.261756 |
| H | -8.01437 | -5.81999 | 3.62701  | -8.03366 | -5.79128 | 3.67101  | -8.00372 | -5.79134 | 3.672337 |
| H | -8.14715 | -6.89619 | -0.55754 | -7.9694  | -6.89929 | -0.50823 | -7.99171 | -6.90273 | -0.50647 |
| H | -8.0671  | -8.22258 | 4.246222 | -8.05541 | -8.18977 | 4.305498 | -8.02226 | -8.18931 | 4.308976 |
| H | -8.18219 | -9.30275 | 0.064732 | -7.97569 | -9.30125 | 0.131234 | -7.99438 | -9.30415 | 0.134954 |
| H | -8.15129 | -9.97573 | 2.469437 | -8.02689 | -9.95605 | 2.540414 | -8.01807 | -9.95702 | 2.545083 |

---

## 8. Reference

- 1 M. Yamada, Y. Tanaka, Y. Yoshimoto, S. Kuroda and I. Shima, *Bull. Chem. Soc. Jpn.*, 1992, **65**, 1006-1011.
- 2 E. M. Kober, J. V. Caspar, B. P. Sullivan and T. J. Meyer, *Inorg. Chem.*, 1988, **27**, 4587-4598.
- 3 M.-F. Wang, R. Yang, S.-J. Tang, Y.-A. Deng, G.-K. Li, D. Zhang, D. Chen, X. Ren and F. Gao, *Angew. Chem. Int. Ed.*, 2022, **61**, e202208721.
- 4 *Gaussian 16 Rev. C.01*, M. J. Frisch, G. W. Trucks, H. B. Schlegel, G. E. Scuseria, M. A. Robb, J. R. Cheeseman, G. Scalmani, V. Barone, G. A. Petersson, H. Nakatsuji, X. Li, M. Caricato, A. V. Marenich, J. Bloino, B. G. Janesko, R. Gomperts, B. Mennucci, H. P. Hratchian, J. V. Ortiz, A. F. Izmaylov, J. L. Sonnenberg, Williams, F. Ding, F. Lipparini, F. Egidi, J. Goings, B. Peng, A. Petrone, T. Henderson, D. Ranasinghe, V. G. Zakrzewski, J. Gao, N. Rega, G. Zheng, W. Liang, M. Hada, M. Ehara, K. Toyota, R. Fukuda, J. Hasegawa, M. Ishida, T. Nakajima, Y. Honda, O. Kitao, H. Nakai, T. Vreven, K. Throssell, J. A. Montgomery Jr., J. E. Peralta, F. Ogliaro, M. J. Bearpark, J. J. Heyd, E. N. Brothers, K. N. Kudin, V. N. Staroverov, T. A. Keith, R. Kobayashi, J. Normand, K. Raghavachari, A. P. Rendell, J. C. Burant, S. S. Iyengar, J. Tomasi, M. Cossi, J. M. Millam, M. Klene, C. Adamo, R. Cammi, J. W. Ochterski, R. L. Martin, K. Morokuma, O. Farkas, J. B. Foresman and D. J. Fox, Wallingford, CT, 2016.
- 5 H. S. Yu, X. He, S. L. Li and D. G. Truhlar, *Chem. Sci.*, 2016, **7**, 5032-5051.
- 6 T. Yanai, D. P. Tew and N. C. Handy, *Chem. Phys. Lett.*, 2004, **393**, 51-57.
- 7 Y. Zhao and D. G. Truhlar, *Theor. Chem. Acc.*, 2008, **120**, 215-241.
- 8 H. S. Yu, X. He and D. G. Truhlar, *J. Chem. Theory Comput.*, 2016, **12**, 1280-1293.
- 9 S. Grimme, J. Antony, S. Ehrlich and H. Krieg, *J. Chem. Phys.*, 2010, **132**, 154104.
- 10 S. Grimme, S. Ehrlich and L. Goerigk, *J. Comput. Chem.*, 2011, **32**, 1456-1465.
- 11 V. Barone, M. Cossi and J. Tomasi, *J. Comput. Chem.*, 1998, **19**, 404-417.
- 12 R. L. Martin, *J. Chem. Phys.*, 2003, **118**, 4775-4777.
- 13 Z. X. Zhou, F. Gao, X. Chen, X. J. Tian and L. N. Ji, *Inorg. Chem.*, 2014, **53**, 10015-10017.
- 14 Z. Yu, W. K. Chan, Y. Zhang and T. T. Y. Tan, *Biomaterials*, 2021, **269**, 120459.
- 15 W. J. Xu, S. J. Liu, X. Zhao, N. Zhao, Z. Q. Liu, H. Xu, H. Liang, Q. Zhao, X. Q. Yu and W. Huang, *Chem. Eur. J.*, 2013, **19**, 621-629.
- 16 N. P. Toupin, S. Nadella, S. J. Steinke, C. Turro and J. J. Kodanko, *Inorg. Chem.*, 2020, **59**, 3919-3933.
- 17 G.-L. Ma, X.-D. Bi, F. Gao, Z. Feng, D.-C. Zhao, F.-J. Lin, R. Yan, D. Liu, P. Liu, J. Chen and H. Zhang, *J. Inorg. Biochem.*, 2018, **185**, 1-9.
